# Supplementary material for: Diversified secondary metabolite biosynthesis gene repertoire revealed in symbiotic dinoflagellates
Source: PubMed Central journal article supplement (PMC6361889; doi:10.1038/s41598-018-37792-0), 2019-02-04
Supplement: 41598_2018_37792_MOESM1_ESM.pdf [file 41598_2018_37792_MOESM1_ESM.pdf]

## **Supplementary Information**

### **Diversified secondary metabolite biosynthesis gene repertoire revealed in symbiotic dinoflagellates**

Girish Beedessee<sup>1\*</sup>, Kanako Hisata<sup>1</sup>, Michael C. Roy<sup>2</sup>, Frances M. Van Dolah<sup>3</sup>, Noriyuki Satoh<sup>1</sup>, Eiichi Shoguchi<sup>1\*</sup>

<sup>1</sup>Marine Genomics Unit, Okinawa Institute of Science and Technology Graduate University, Onna, Okinawa 904-0495, Japan.

<sup>2</sup>Instrumental Analysis Section, Okinawa Institute of Science and Technology Graduate University, Onna, Okinawa 904-0495, Japan

<sup>3</sup>College of Charleston, School of Sciences and Mathematics, 66 George St., Charleston, South Carolina, 29424, USA.

## Supplementary Figures

**Figure S1.** Molecular phylogenetic tree of ketosynthase domain from prokaryotes and eukaryotes analyzed using Bayesian inference.

**Figure S2.** Molecular phylogenetic tree of ketosynthase domain from prokaryotes and eukaryotes analyzed using maximum likelihood.

**Figure S3.** GC plots of 4 scaffolds associated with dinoflagellate PKS-I (Fig. 1). Gaps less than 1% of the input scaffold fasta sequence were filtered. Plots generated using a halting parameter of 100. The GC profile is shown in red while segmentation points are depicted by the numbered green boxes.

**Figure S4.** Molecular phylogenetic tree of acyltransferase domain from prokaryotes and eukaryotes analyzed using Bayesian inference.

**Figure S5.** Molecular phylogenetic tree of acyltransferase domain from prokaryotes and eukaryotes analyzed using maximum likelihood.

**Figure S6.** Pathway duplication and conservation within and across *Symbiodinium* clades. **a** Plot showing duplicate gene distribution within *PKS*-containing scaffolds of three *Symbiodinium* genomes. Colored sections (black = clade B1, orange = clade C, blue = clade A3) represent scaffolds studied in Fig. 1. A link represents a possible duplication event between two domains. **b** Synteny plot of clade A3 and B1 *PKS*-containing scaffolds. **c** Synteny plot of clade B1 and C *PKS*-containing scaffolds. **d** Synteny plot of clade A3 and C *PKS*-containing scaffolds. Dotted boxes highlight regions of significant homology between genomes. Green colored dotted boxes show common regions shared among the three genomes.

**Figure S7.** Molecular phylogenetic tree of adenylation domain from prokaryotes and eukaryotes analyzed using Bayesian inference.

**Figure S8.** Molecular phylogenetic tree of adenylation domain from prokaryotes and eukaryotes

analyzed using maximum likelihood.

**Figure S9.** Molecular phylogenetic tree of condensation domain from prokaryotes and eukaryotes analyzed using Bayesian inference.

**Figure S10.** Molecular phylogenetic tree of condensation domain from prokaryotes and eukaryotes analyzed using maximum likelihood.

**Figure S11. a.** NanoLC-MS (negative ion) profile and mass spectrum (expanded) of the methanol extract of Clade A3. **b.** Nano-LC-MS (positive ion) profile and mass spectrum (expanded) of the methanol extract of Clade B1. **c.** NanoLC-MS (positive ion) profile and mass spectrum (expanded) of the methanol extract of Clade C.

**Figure S12. a.** NanoLC-MS (negative ion) profile and mass spectrum (expanded) of the methanol extract of Clade C. **b.** Similarity of nanoLC-MS (negative ion) profile and mass spectrum (expanded) of the methanol extract of Clade C and B1.

**Figure S13.** Immunofluorescent staining of *Symbiodinium* cells with anti-KS antibody. **a.** Differential interference contrast (DIC) imaging showing the spherical shape and internal complexity of cells at 40x magnification. **b-d.** Confocal images (63x) of clade C stained with KS antibody show localization of KS proteins (arrows). Nuclei are stained blue with DAPI (b), KS proteins are in green (c) and merged image of nuclei and KS protein staining (d) **e.** DIC imaging of cells at 63x showing detailed peripheral localization of chloroplasts (red autofluorescence) and nuclei (blue). **f-h.** Confocal images (63x) of control cells stained with only secondary antibody. Nuclei are stained with DAPI (f), no KS protein were stained (g) and merged image of nuclei and no-KS staining (h). White dotted lines show the cell outlines. Scale bars are 10  $\mu$ m in the panels.

## Supplementary Tables

**Table S1:** Ketosynthase domain containing genes in *Symbiodinium* clades used in this study.

**Table S2:** Acyltransferase domain containing genes in *Symbiodinium* clades used in this study.

**Table S3:** Condensation domain containing genes in *Symbiodinium* clades used in this study.

**Table S4:** Adenylation domain containing genes in *Symbiodinium* clades used in this study.

**Table S5:** Prediction scores of ChloroP and TargetP, supported by DeepLoc subcellular localization predictor.

**Table S6:** Features of LTR-retrotransposons identified from PKS-associated scaffolds studied in this paper.

**Table S7:** Features of LTR-retrotransposons identified with NRPS-associated scaffolds studied in this paper.

**Table S8:** Details of NCBI, MMETSP and *Symbiodinium kawagutii* sequences belonging to the Dinoflagellate PKS clade (Green insert) in Fig. 1.



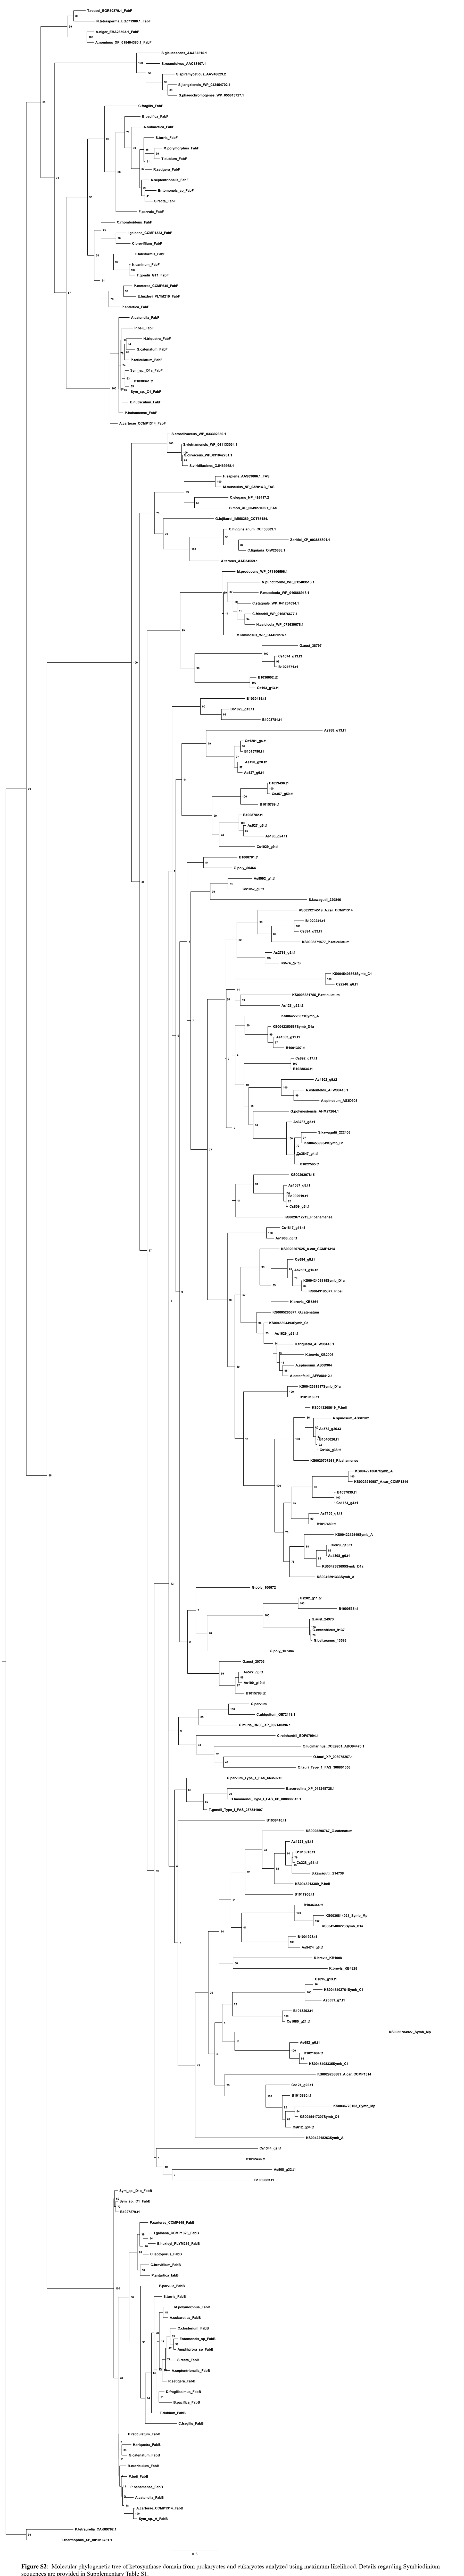

Figure S2: Molecular phylogenetic tree of the Symbiodinium domain from prokaryotes and eukaryotes analyzed using maximum likelihood. Details regarding Symbiodinium sequences are provided in Supplementary Table S1.

Scaffold 2857.1  
(B1027671.t1)

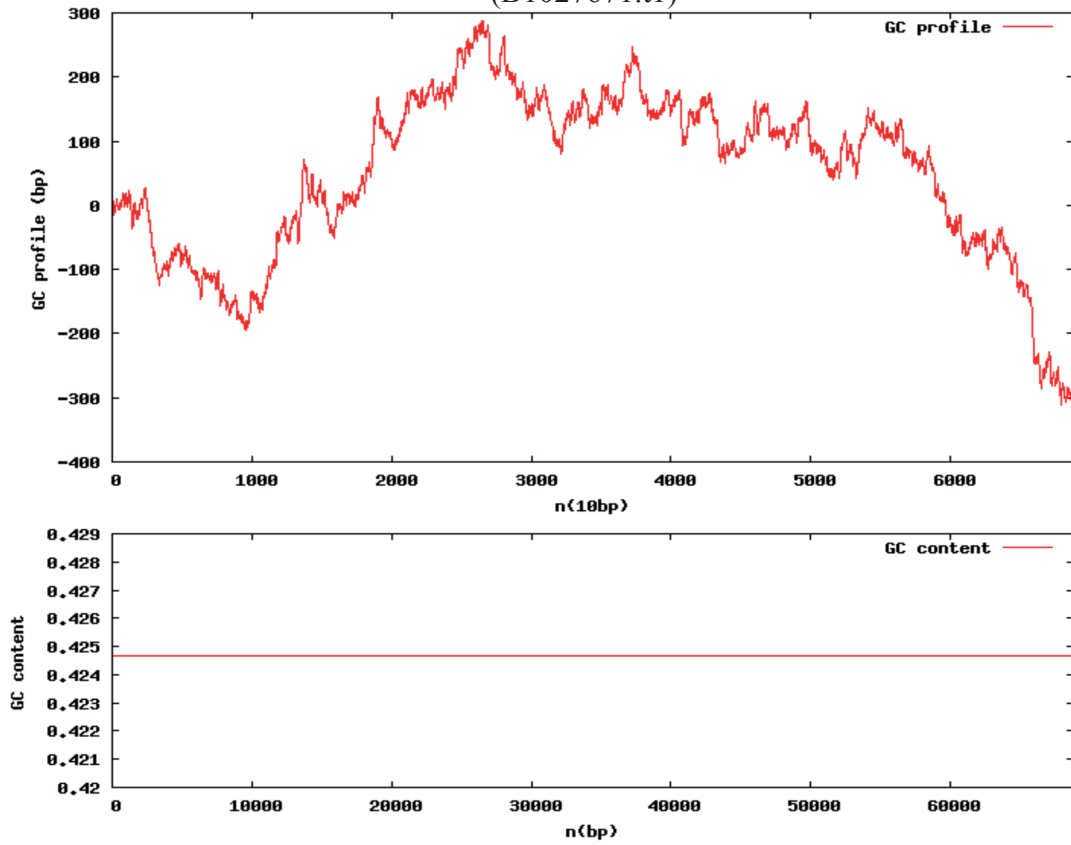

Scaffold 4981.1  
(B1036002.t2)

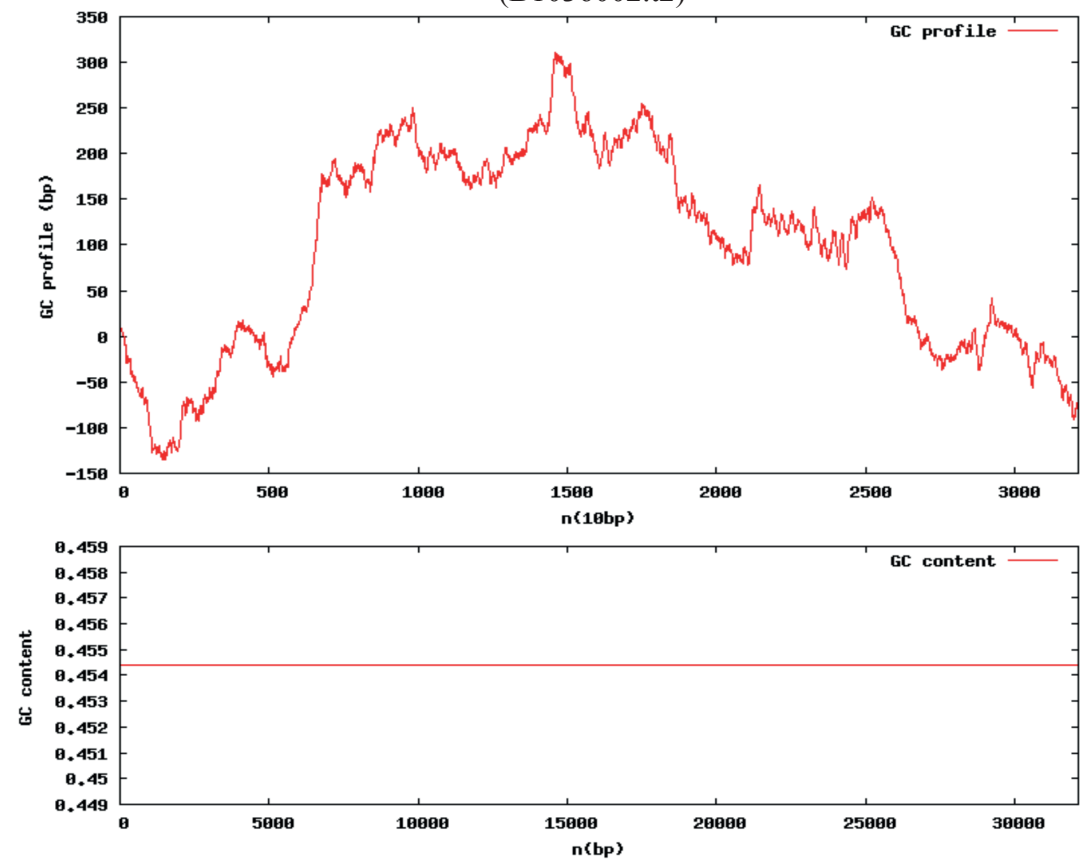

Scaffold 1074.1  
(Cs1074\_g13.t3)

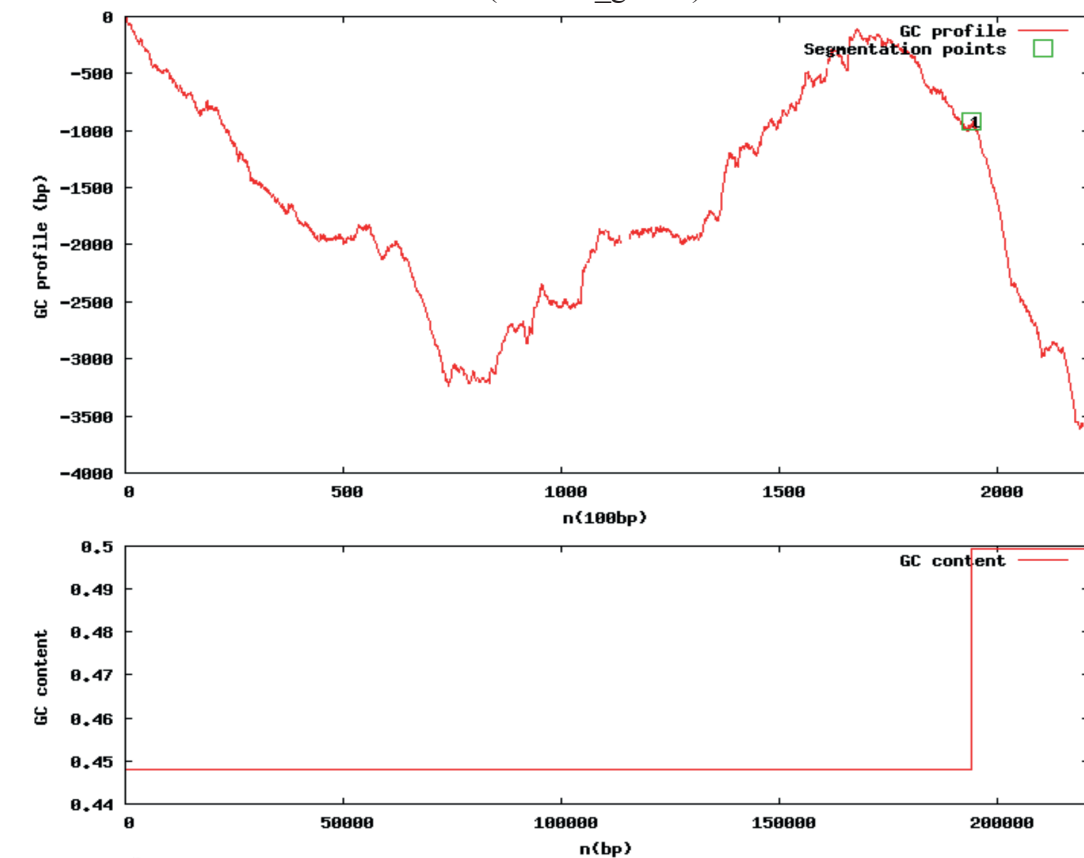

Scaffold 193.1  
(Cs193\_g13.t1)

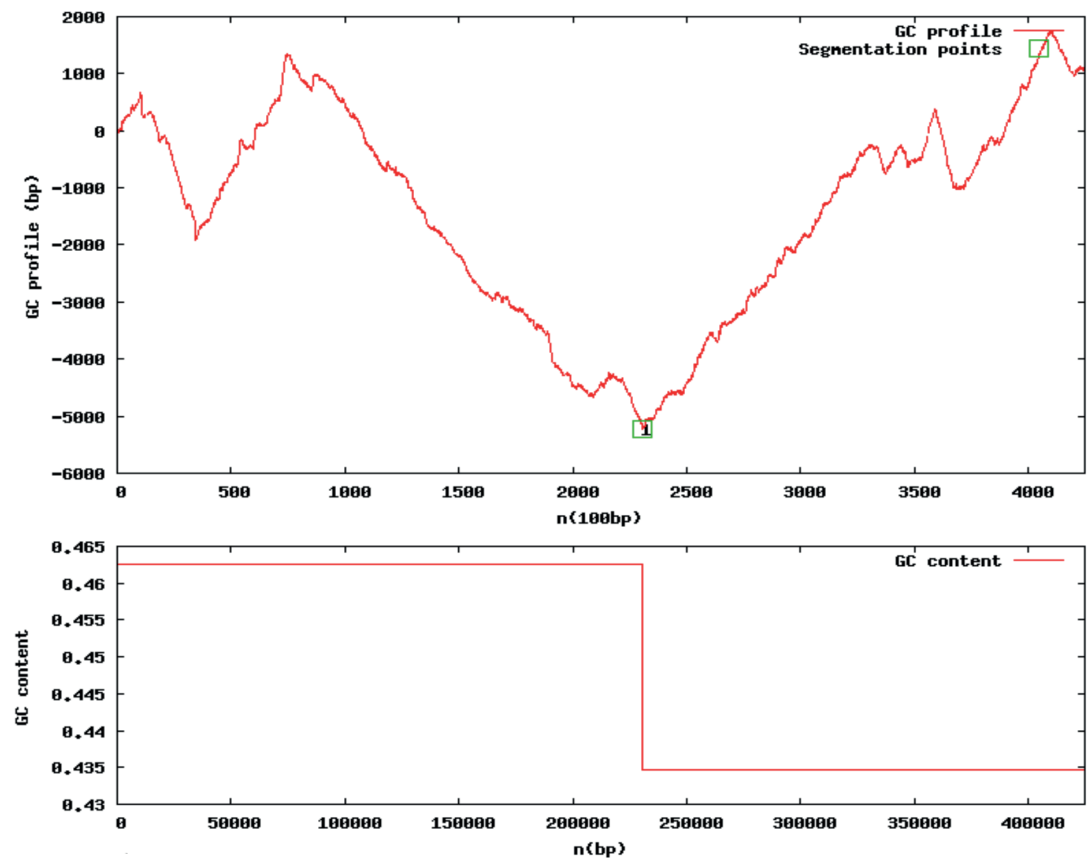

**Figure S3:** GC plots of 4 scaffolds associated with dinoflagellate clade PKS-I (Figure 1a). Gaps less than 1% of the input scaffold fasta sequence were filtered. Plots generated using a halting parameter of 100. The GC profile is shown by the red line while segmentation points are depicted by the numbered green boxes.

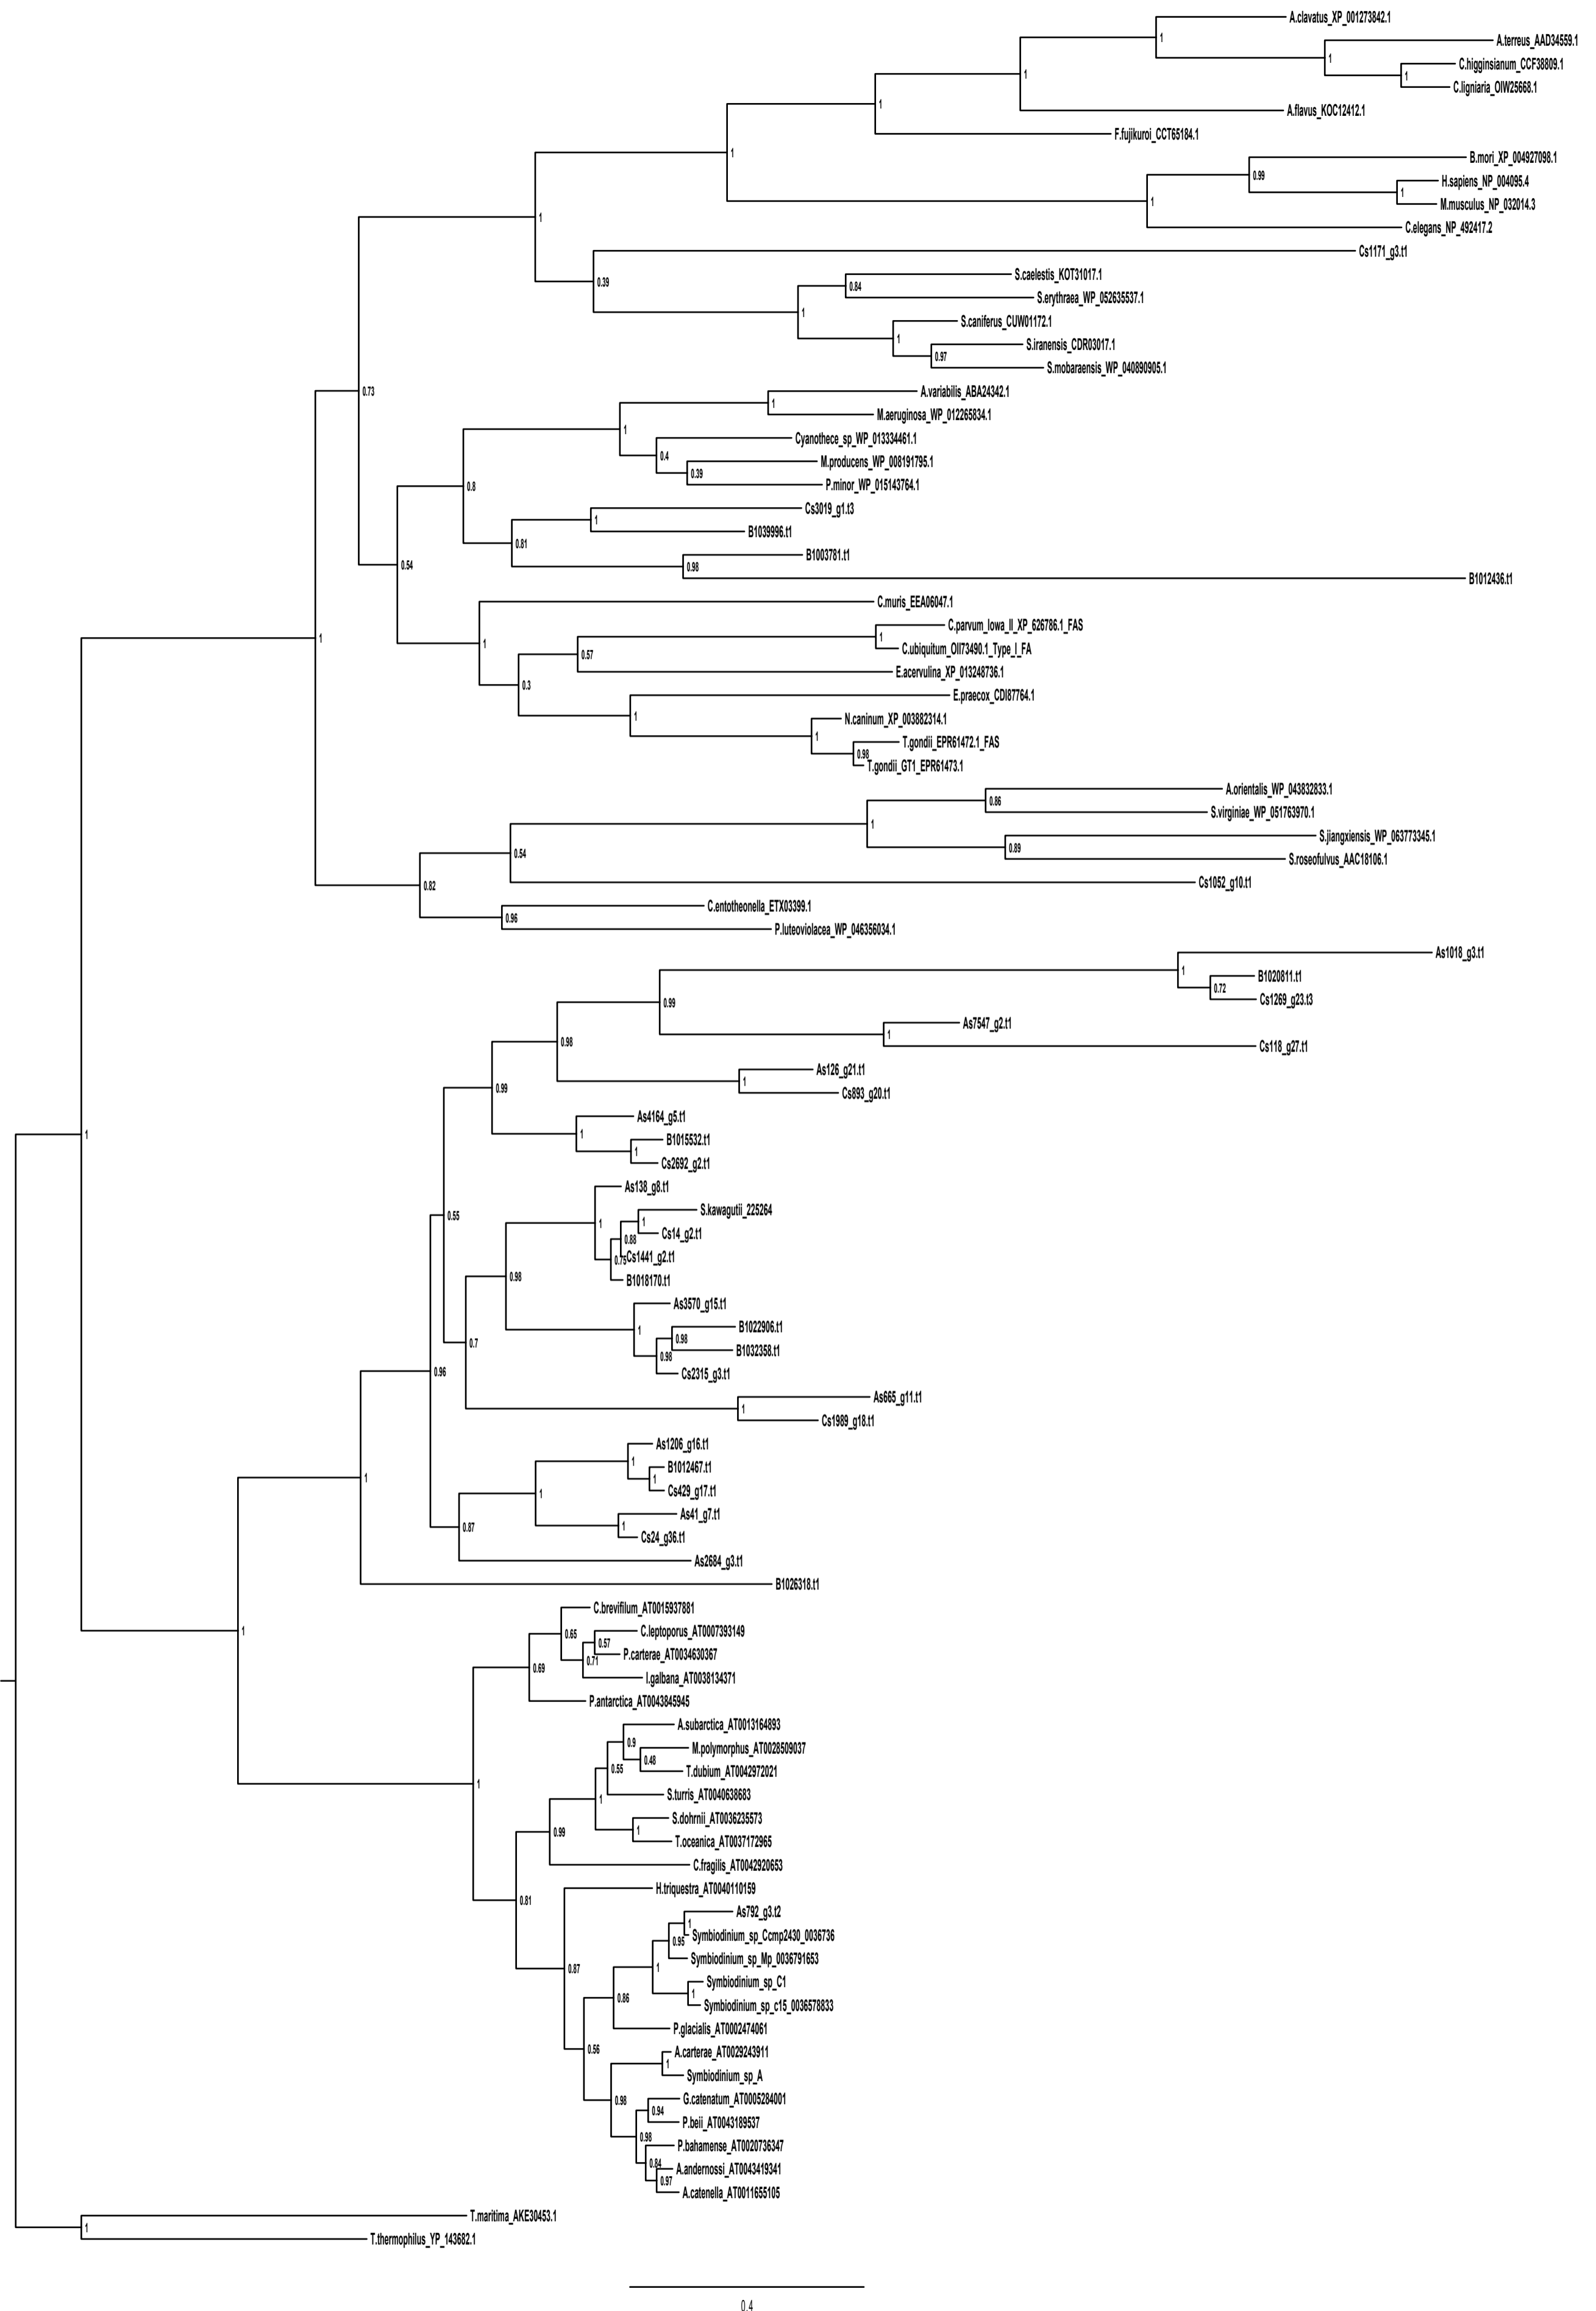

**Figure S4:** Molecular phylogenetic tree of acyltransferase domain from prokaryotes and eukaryotes analyzed using Bayesian inference. Details regarding Symbiodinium sequences are provided in Supplementary Table S2.



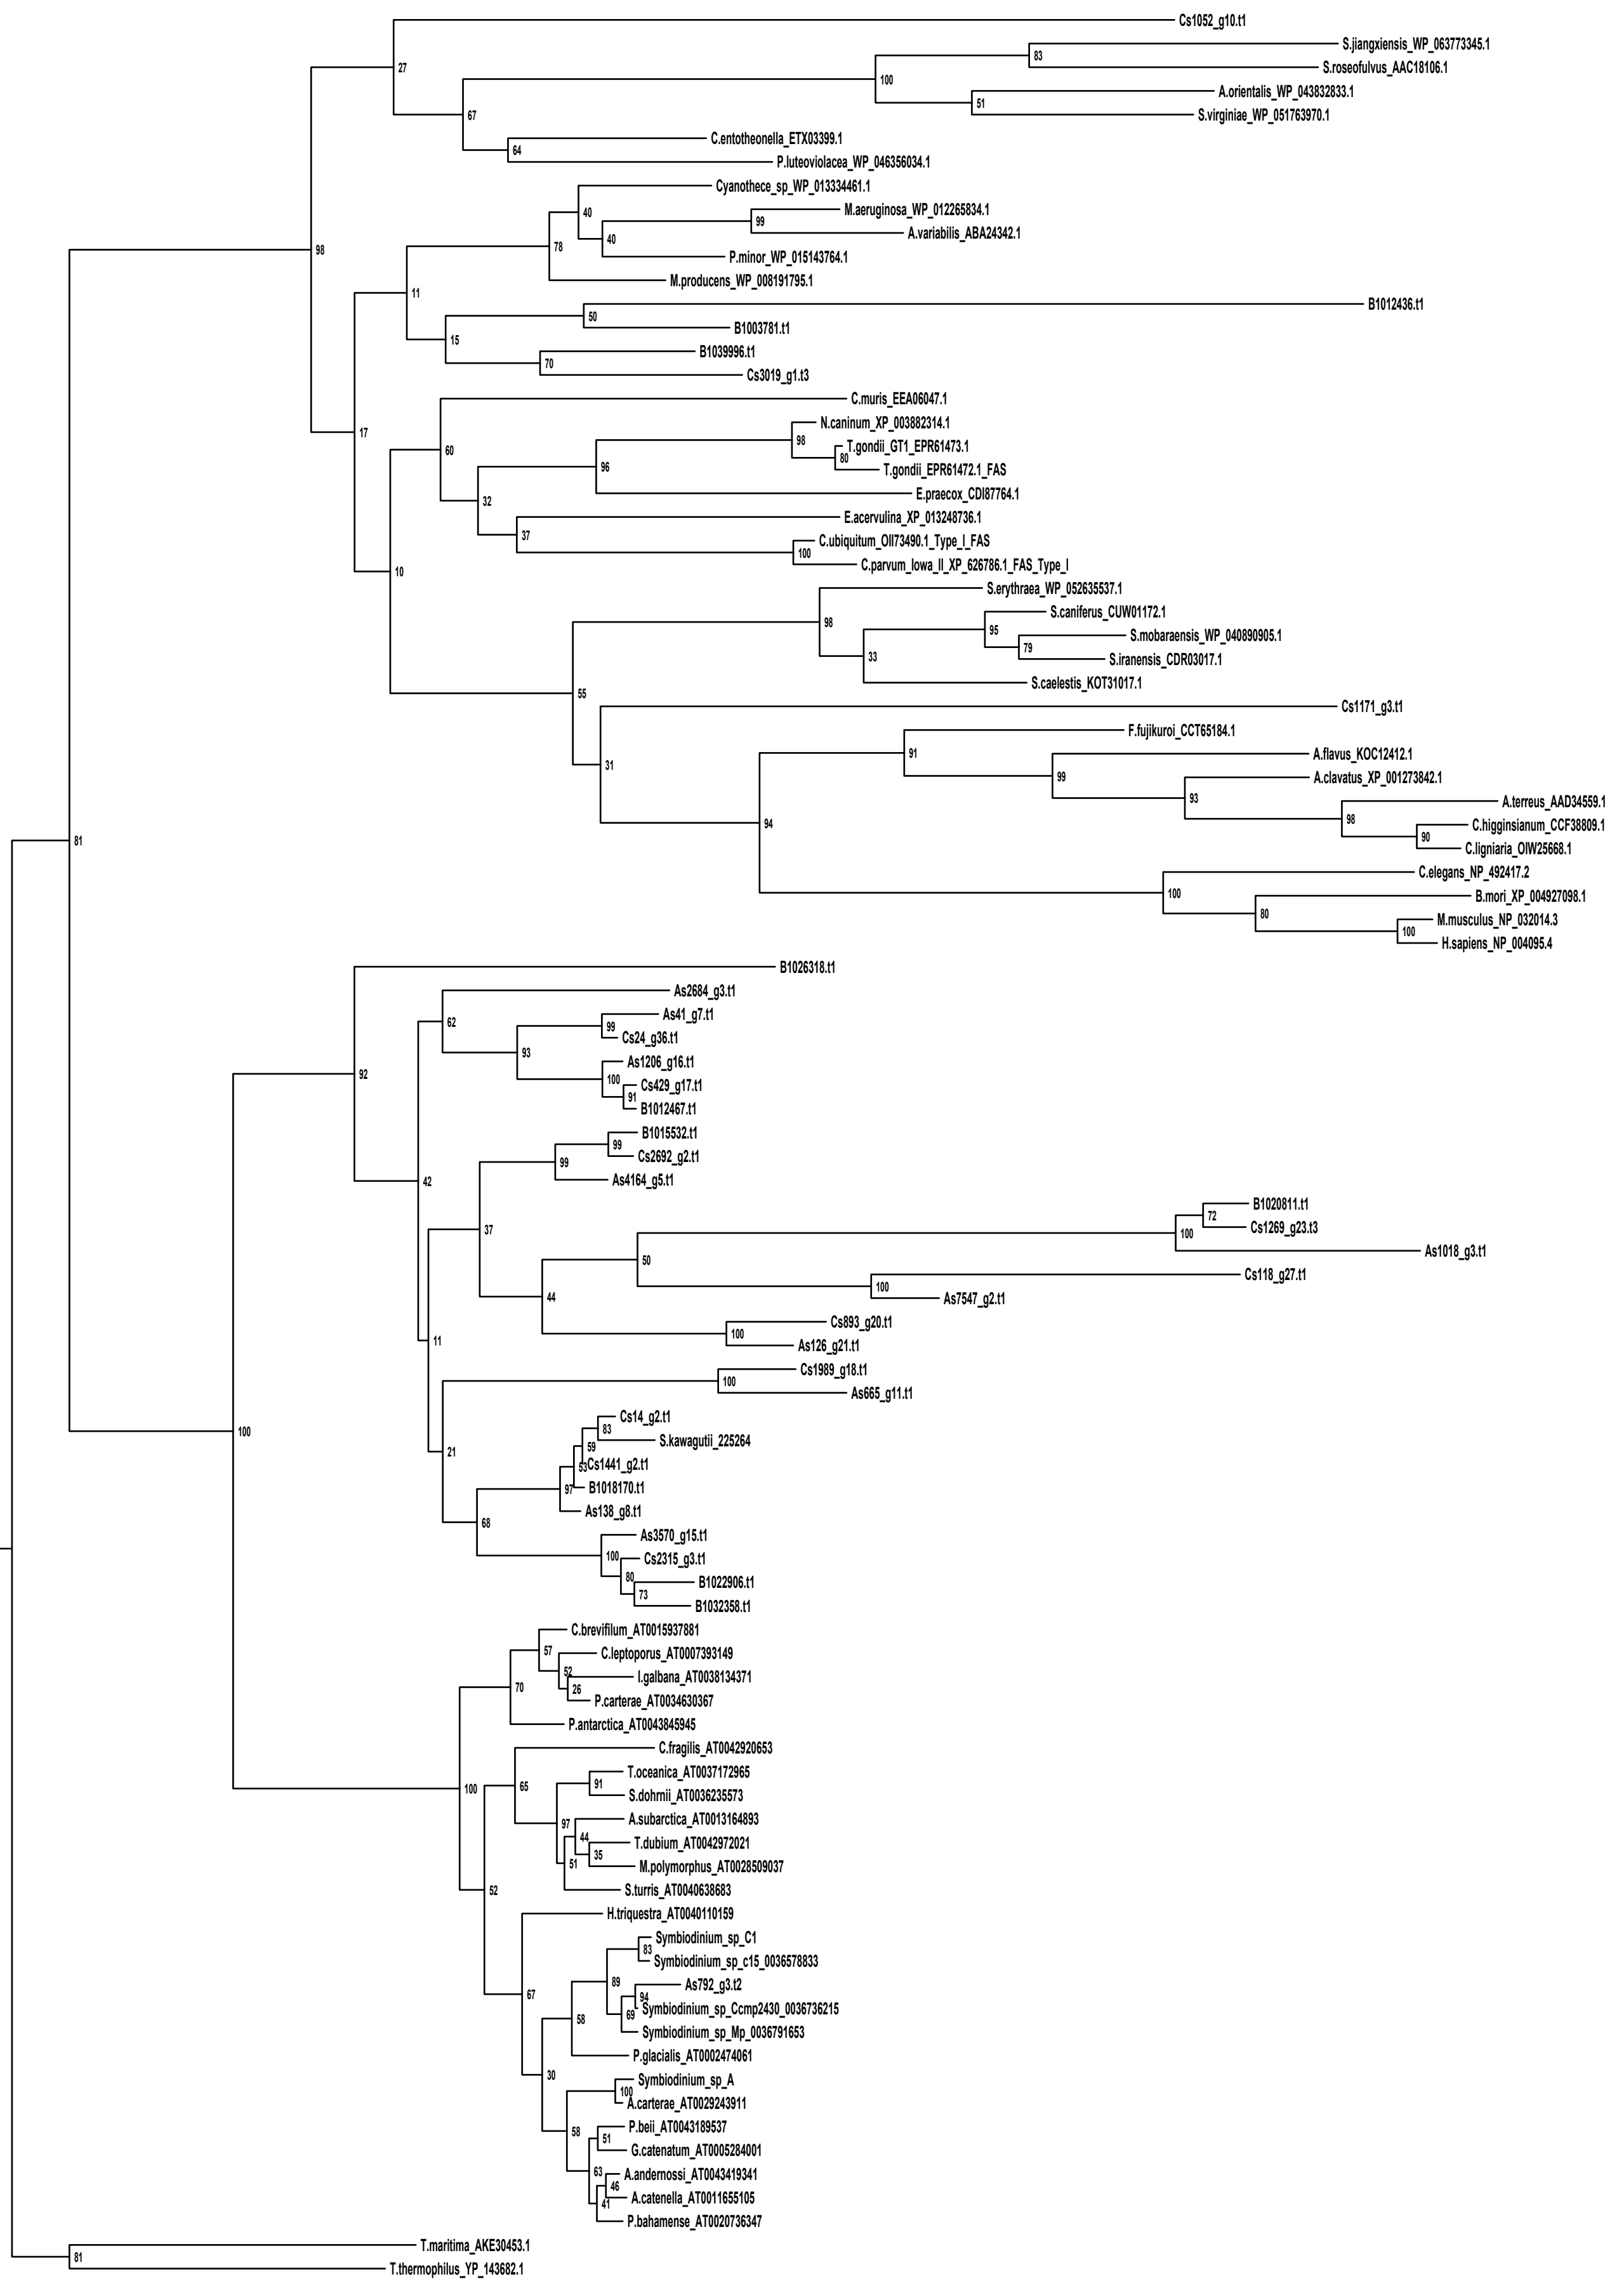

**Figure S5:** Molecular phylogenetic tree of acyltransferase domain from prokaryotes and eukaryotes analyzed using maximum likelihood. Details regarding Symbiodinium sequences are provided in Supplementary Table S2.

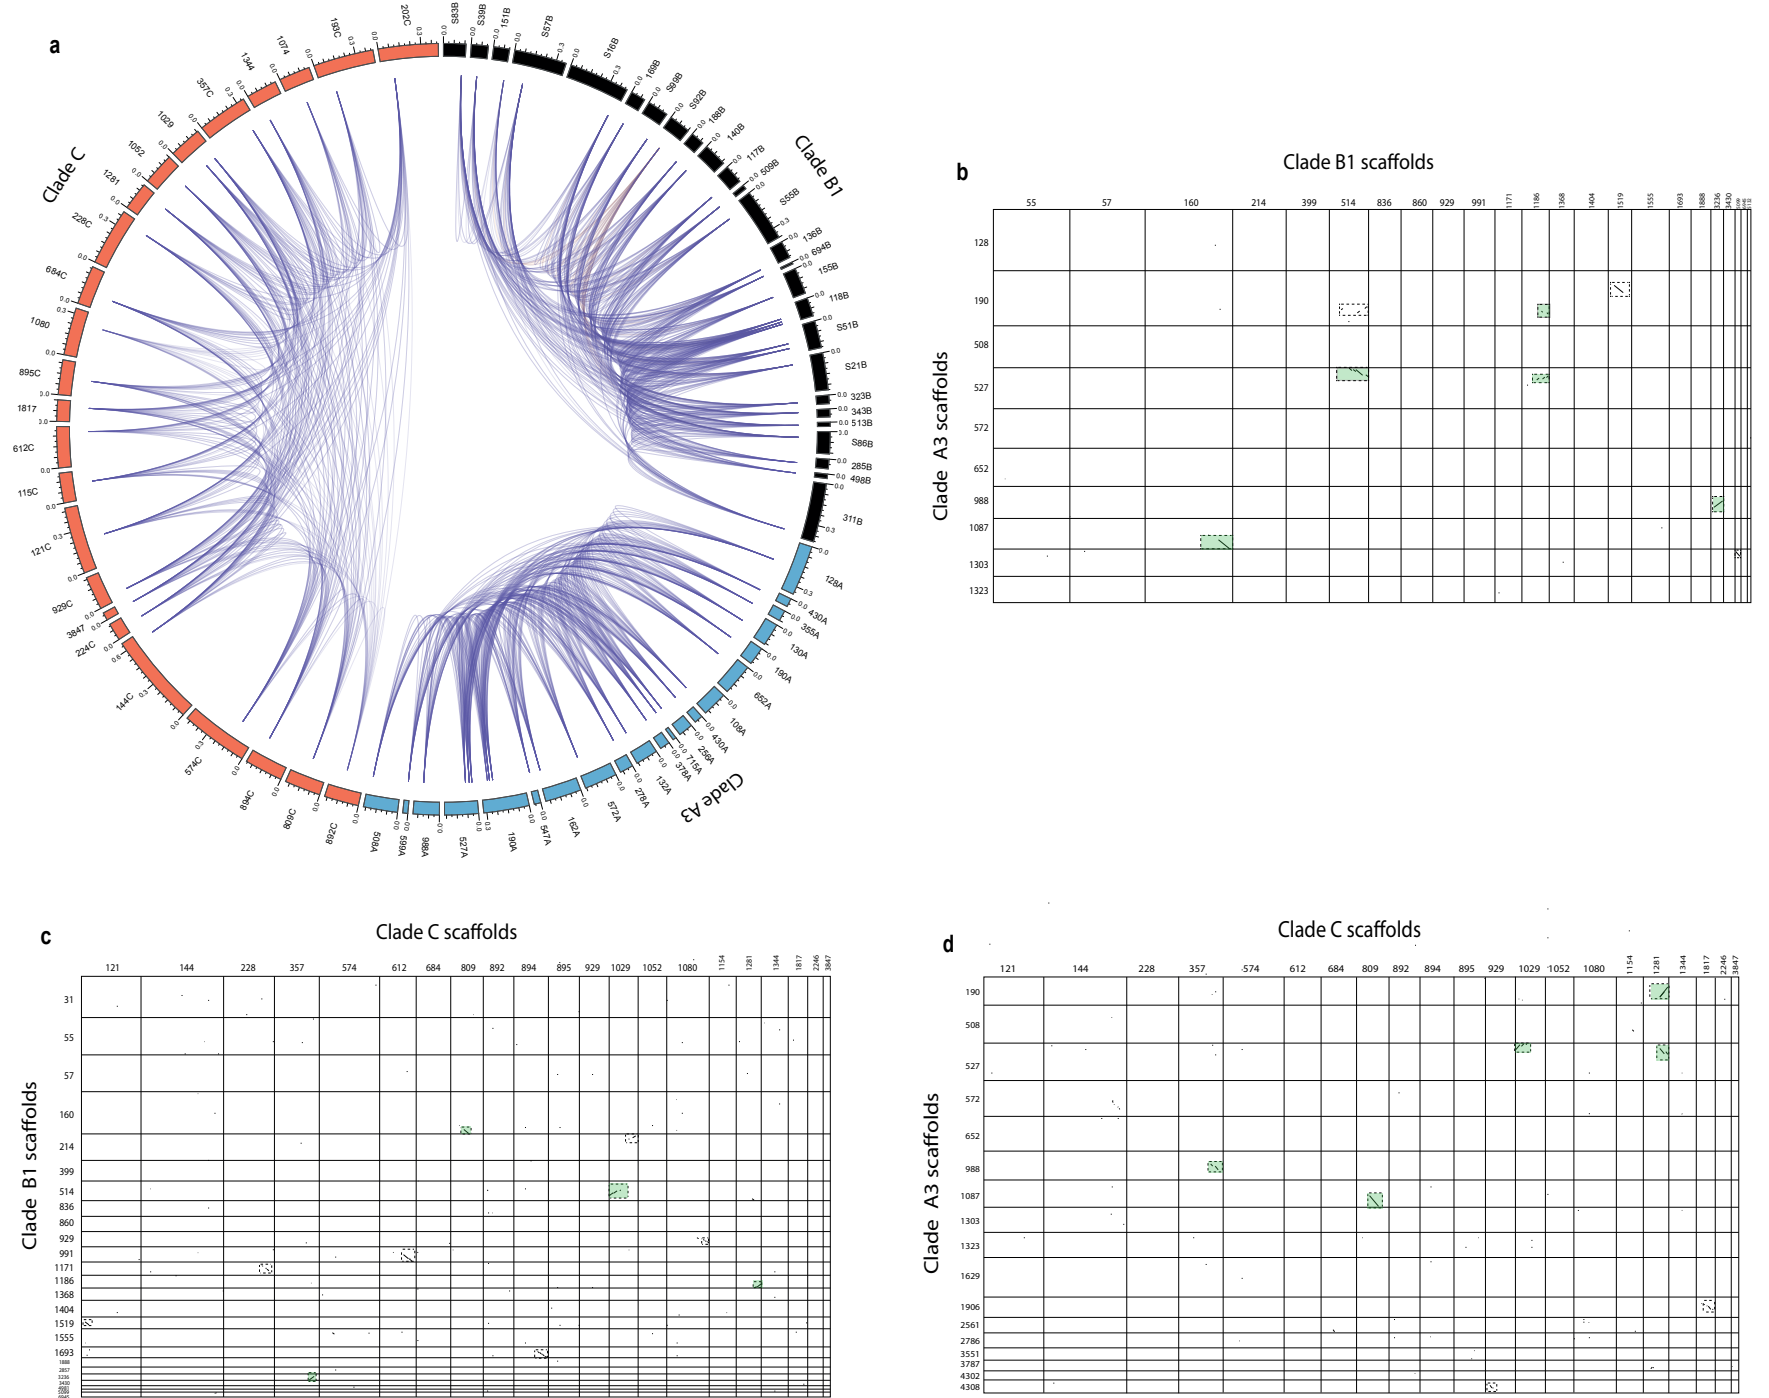

**Figure S6.** Pathway duplication and conservation within and across Symbiodinium clades. **a** Plot showing duplicate gene distribution within PKS-containing scaffolds of three Symbiodinium genomes. Colored sections (black = clade B1, orange = clade C, blue = clade A3) represent scaffolds studied in Fig. 1. A link represents a possible duplication event between two domains. **b** Synteny plot of clade A3 and B1 PKS-containing scaffolds. **c** Synteny plot of clade B1 and C PKS-containing scaffolds. **d** Synteny plot of clade A3 and C PKS-containing scaffolds. Dotted boxes highlight regions of significant homology between genomes. Green colored dotted boxes show common regions shared among the three genomes.

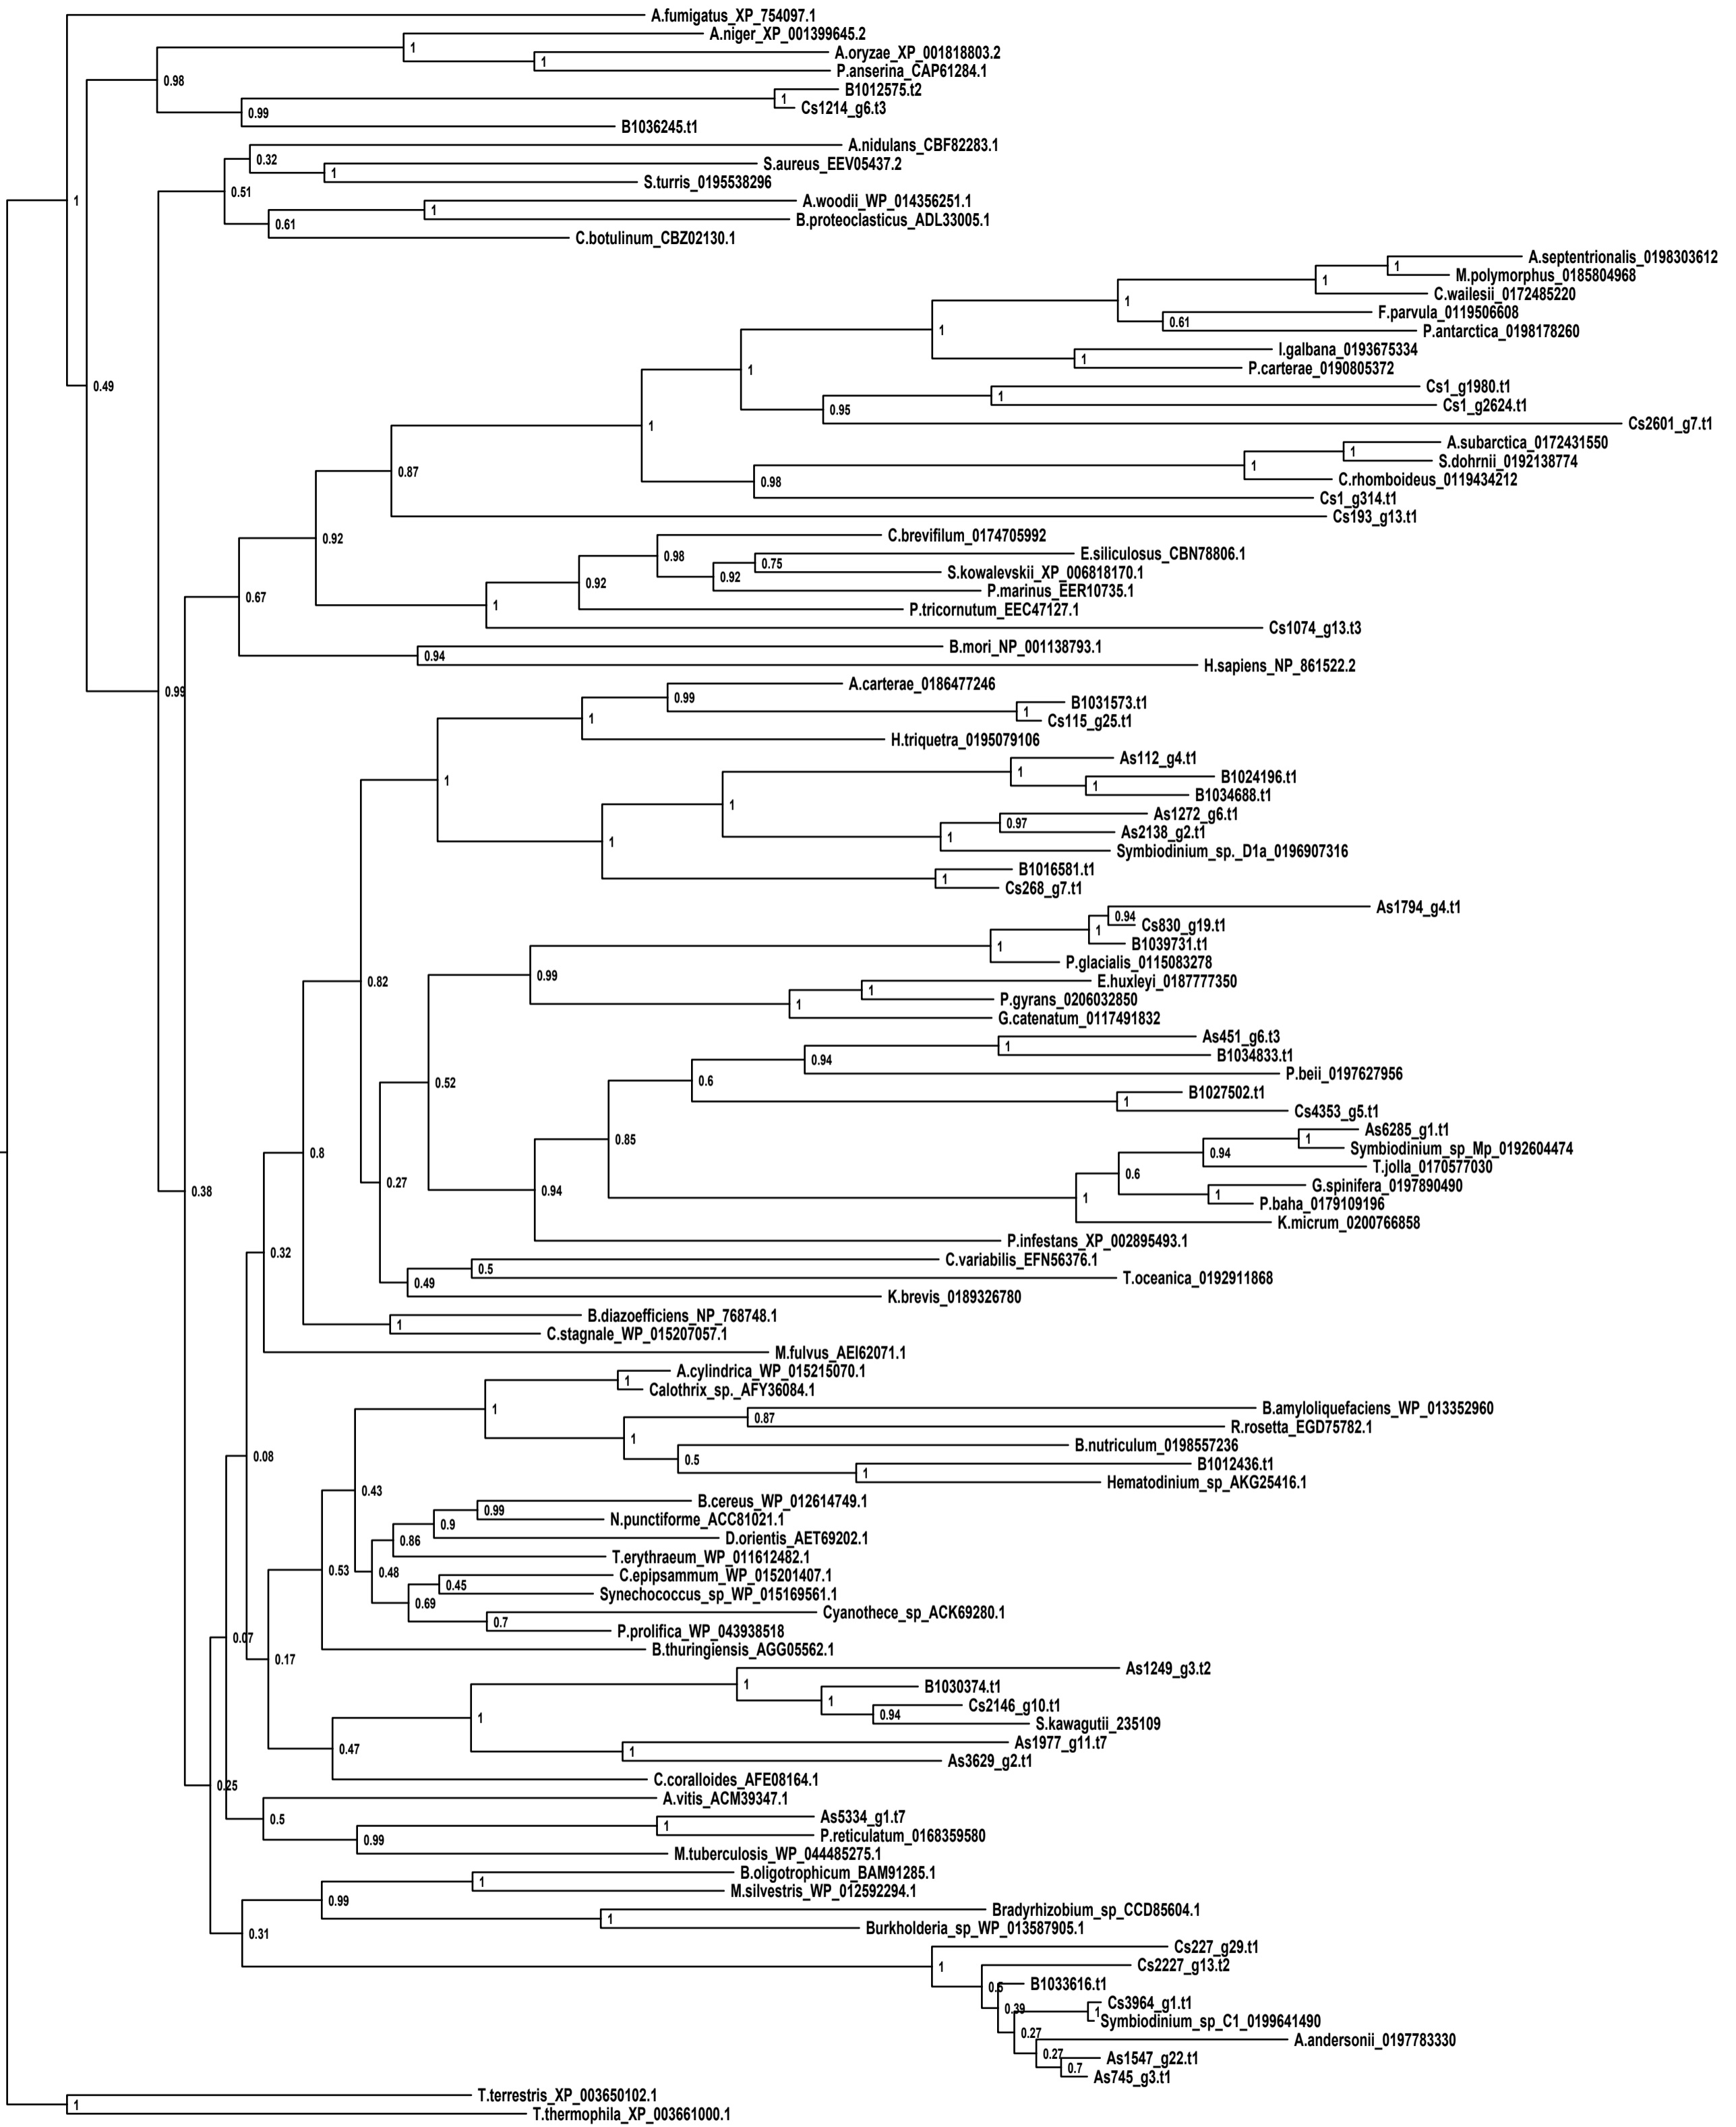

0.6

**Figure S7:** Molecular phylogenetic tree of adenylation domain from prokaryotes and eukaryotes analyzed using Bayesian inference. Details regarding Symbiodinium sequences are provided in Supplementary Table S4.

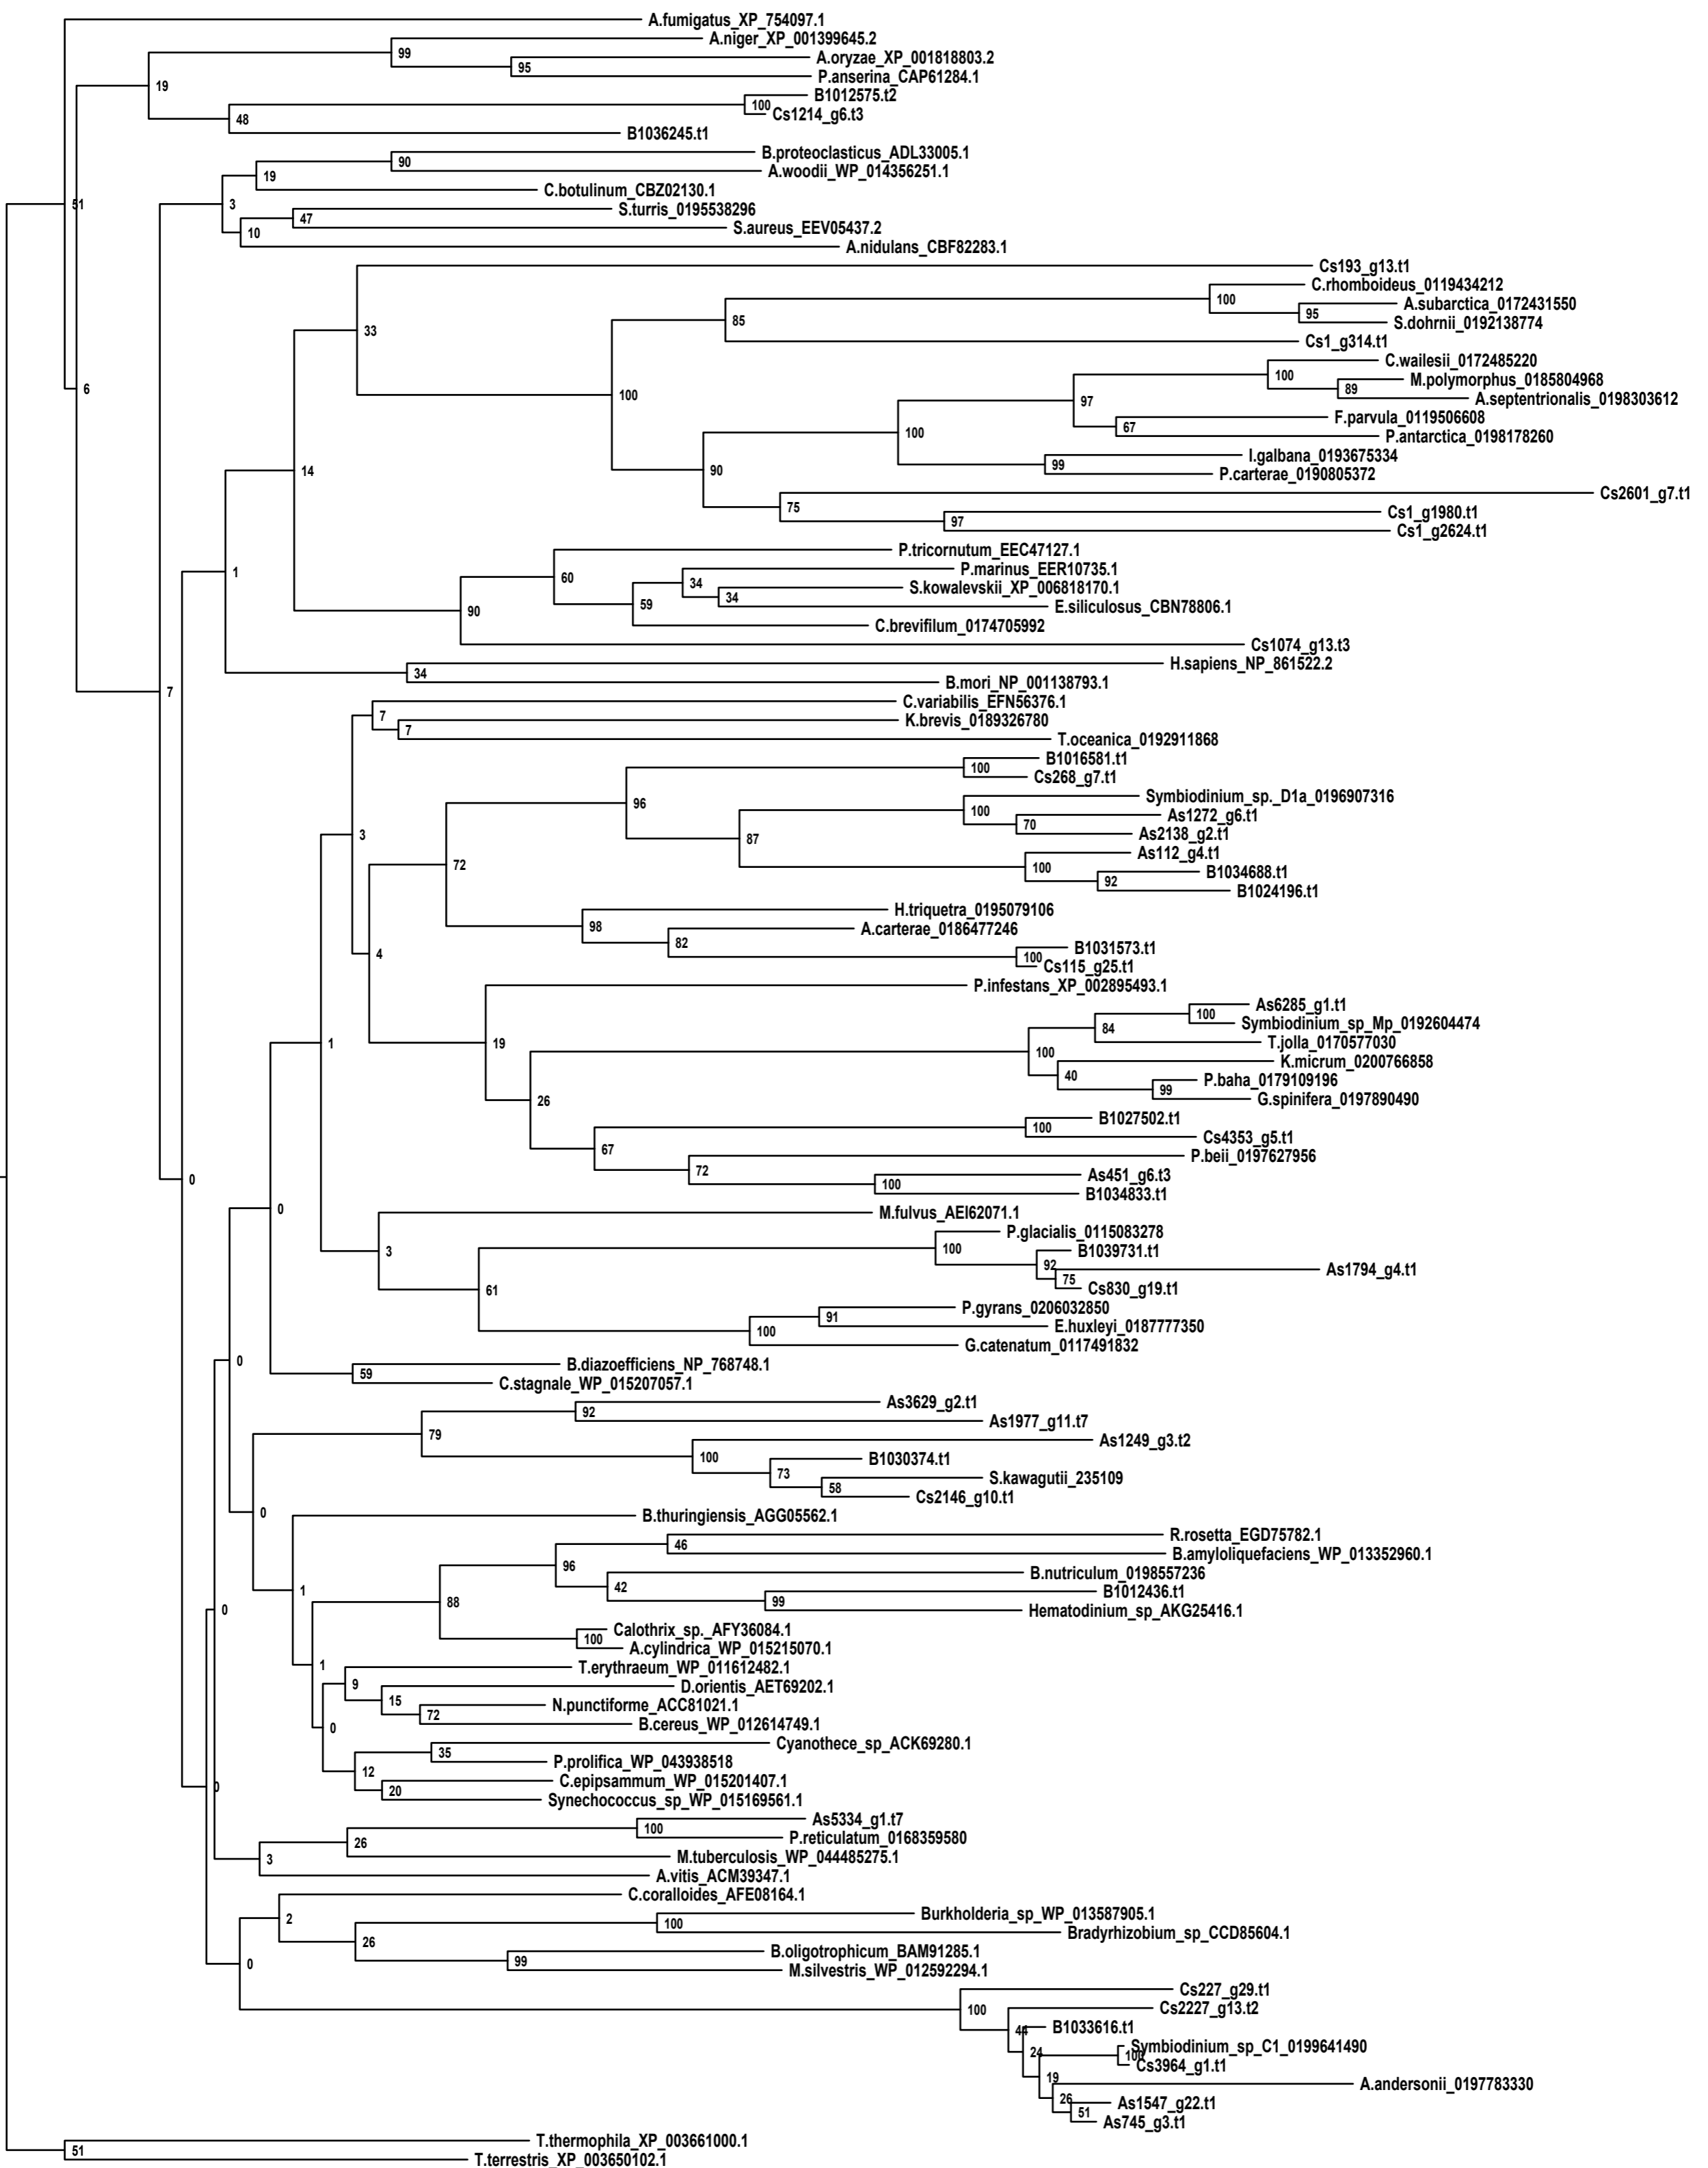

**Figure S8:** Molecular phylogenetic tree of adenylation domain from prokaryotes and eukaryotes analyzed using maximum likelihood. Details regarding Symbiodinium sequences are provided in Supplementary Table S4.

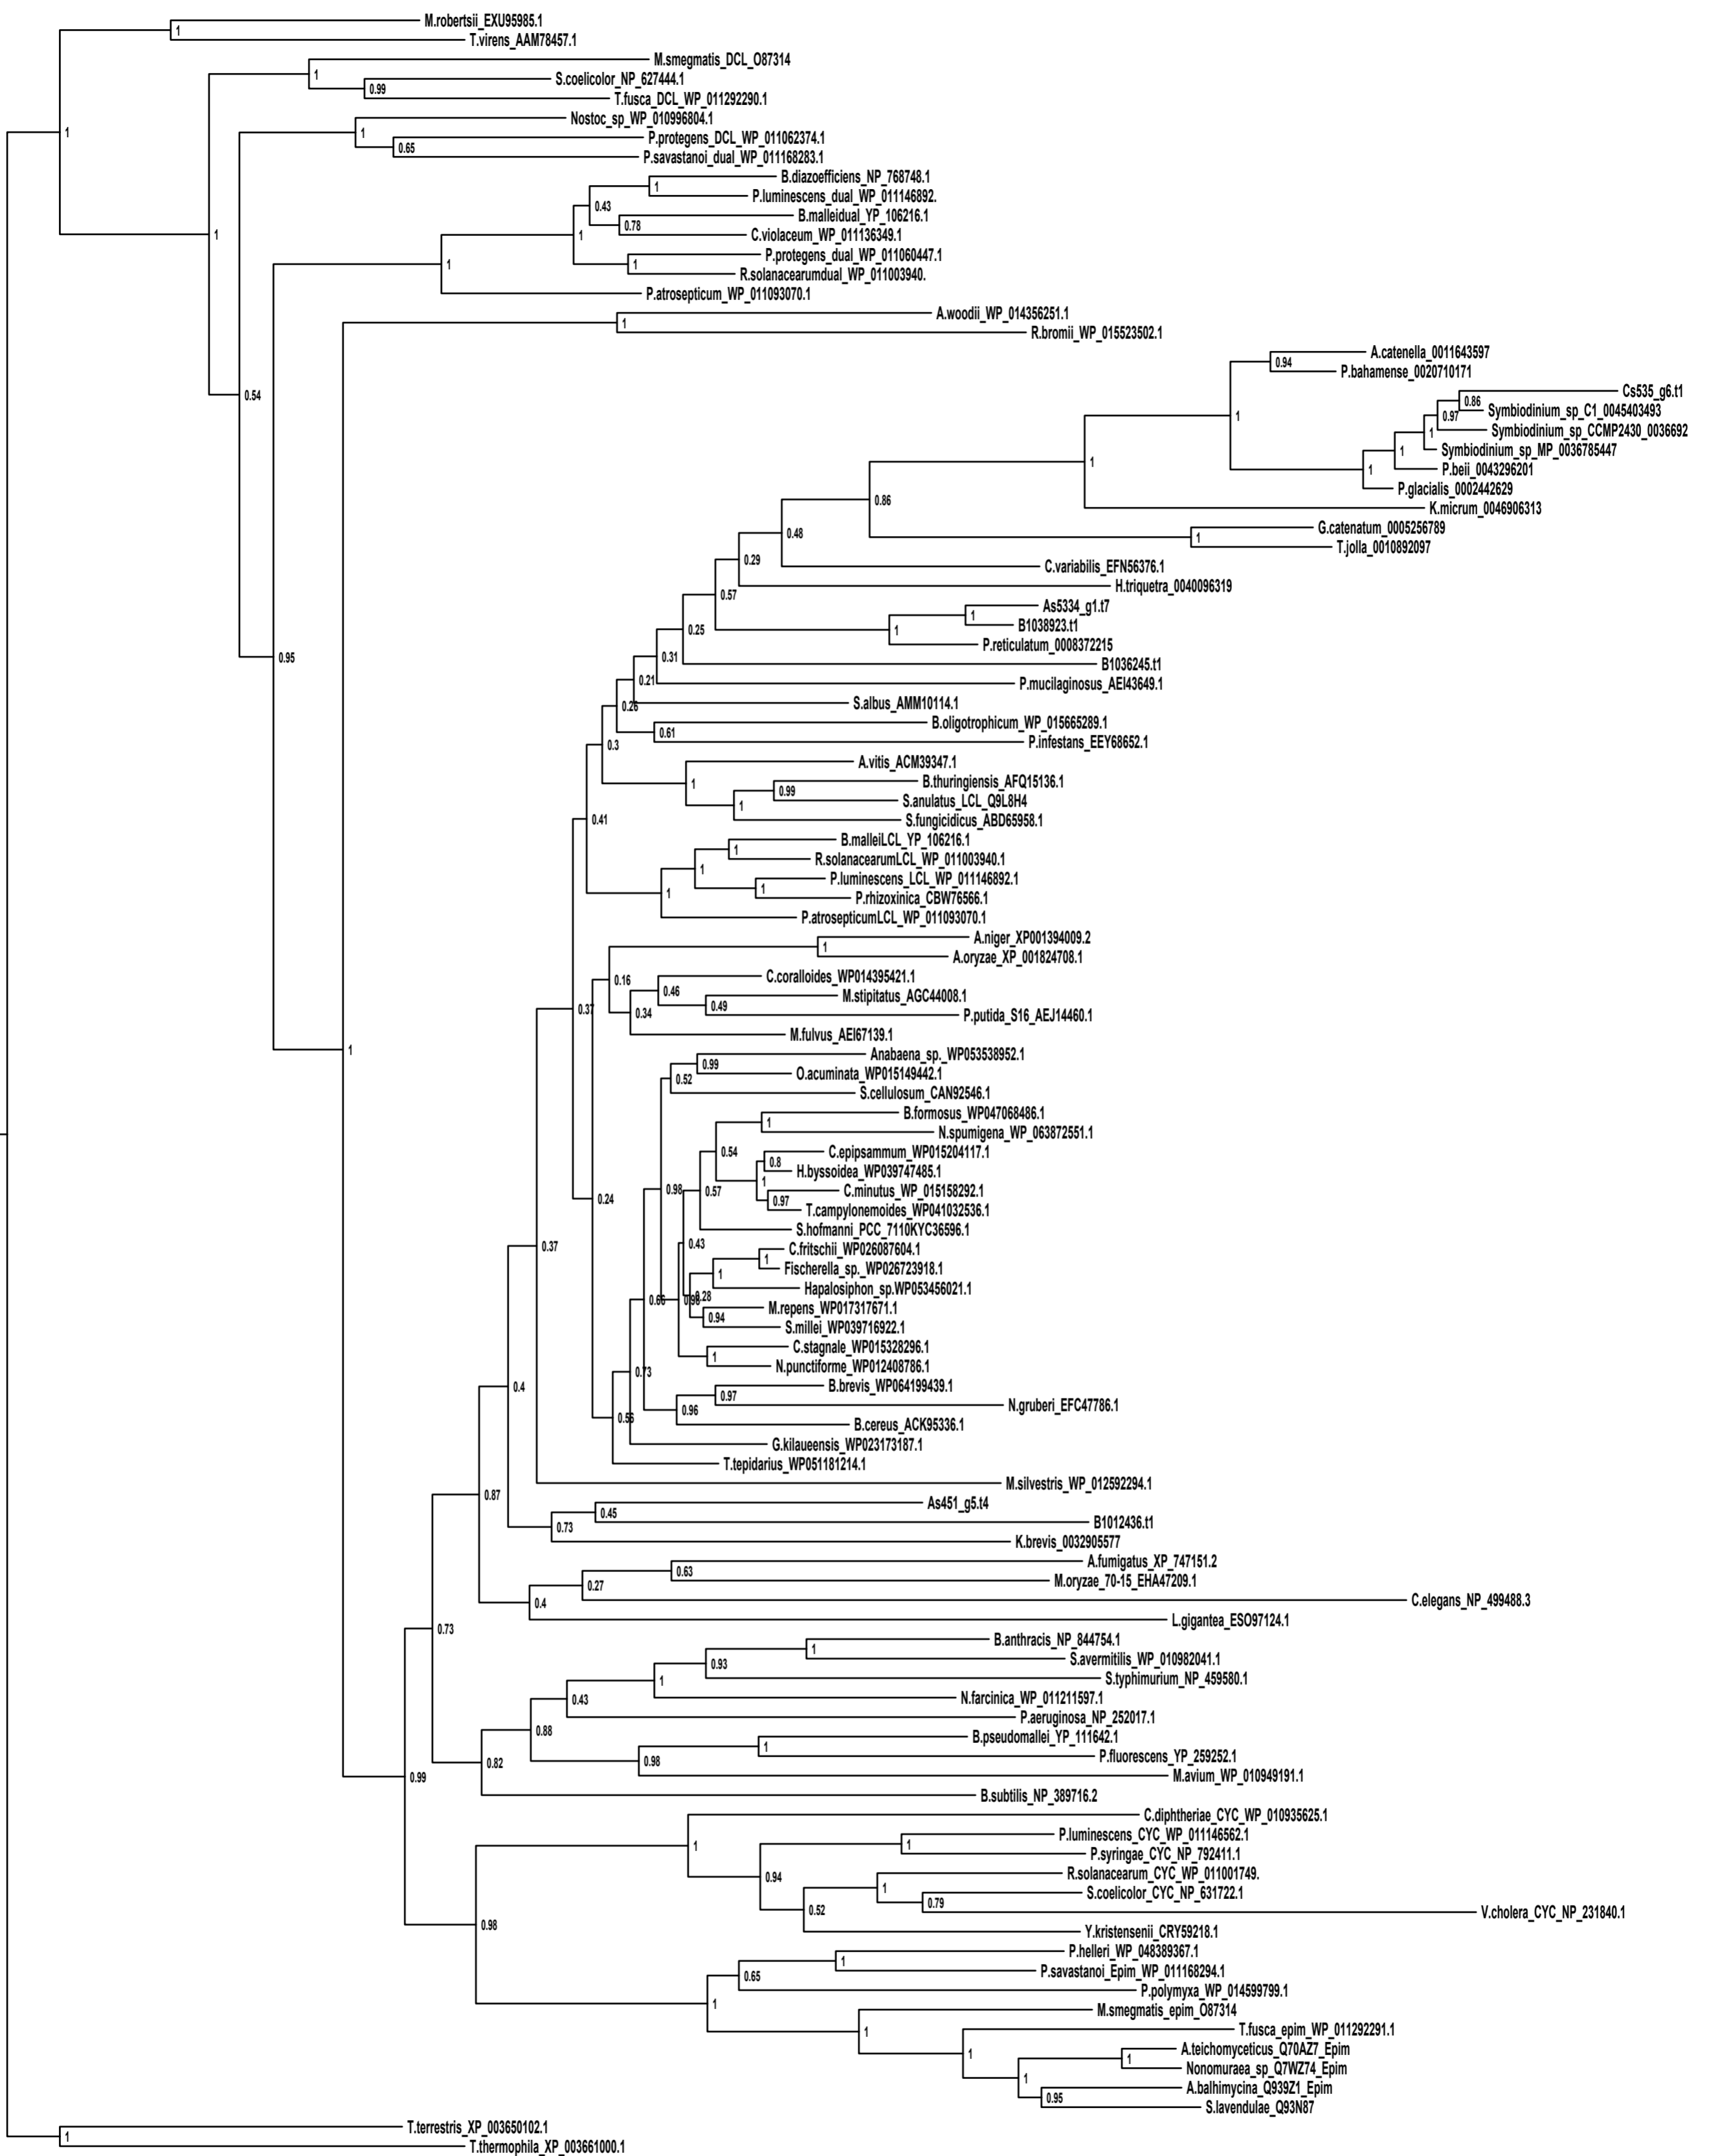

**Figure S9:** Molecular phylogenetic tree of condensation domain from prokaryotes and eukaryotes analyzed using Bayesian inference. Details regarding Symbiodinium sequences are provided in Supplementary Table S3.

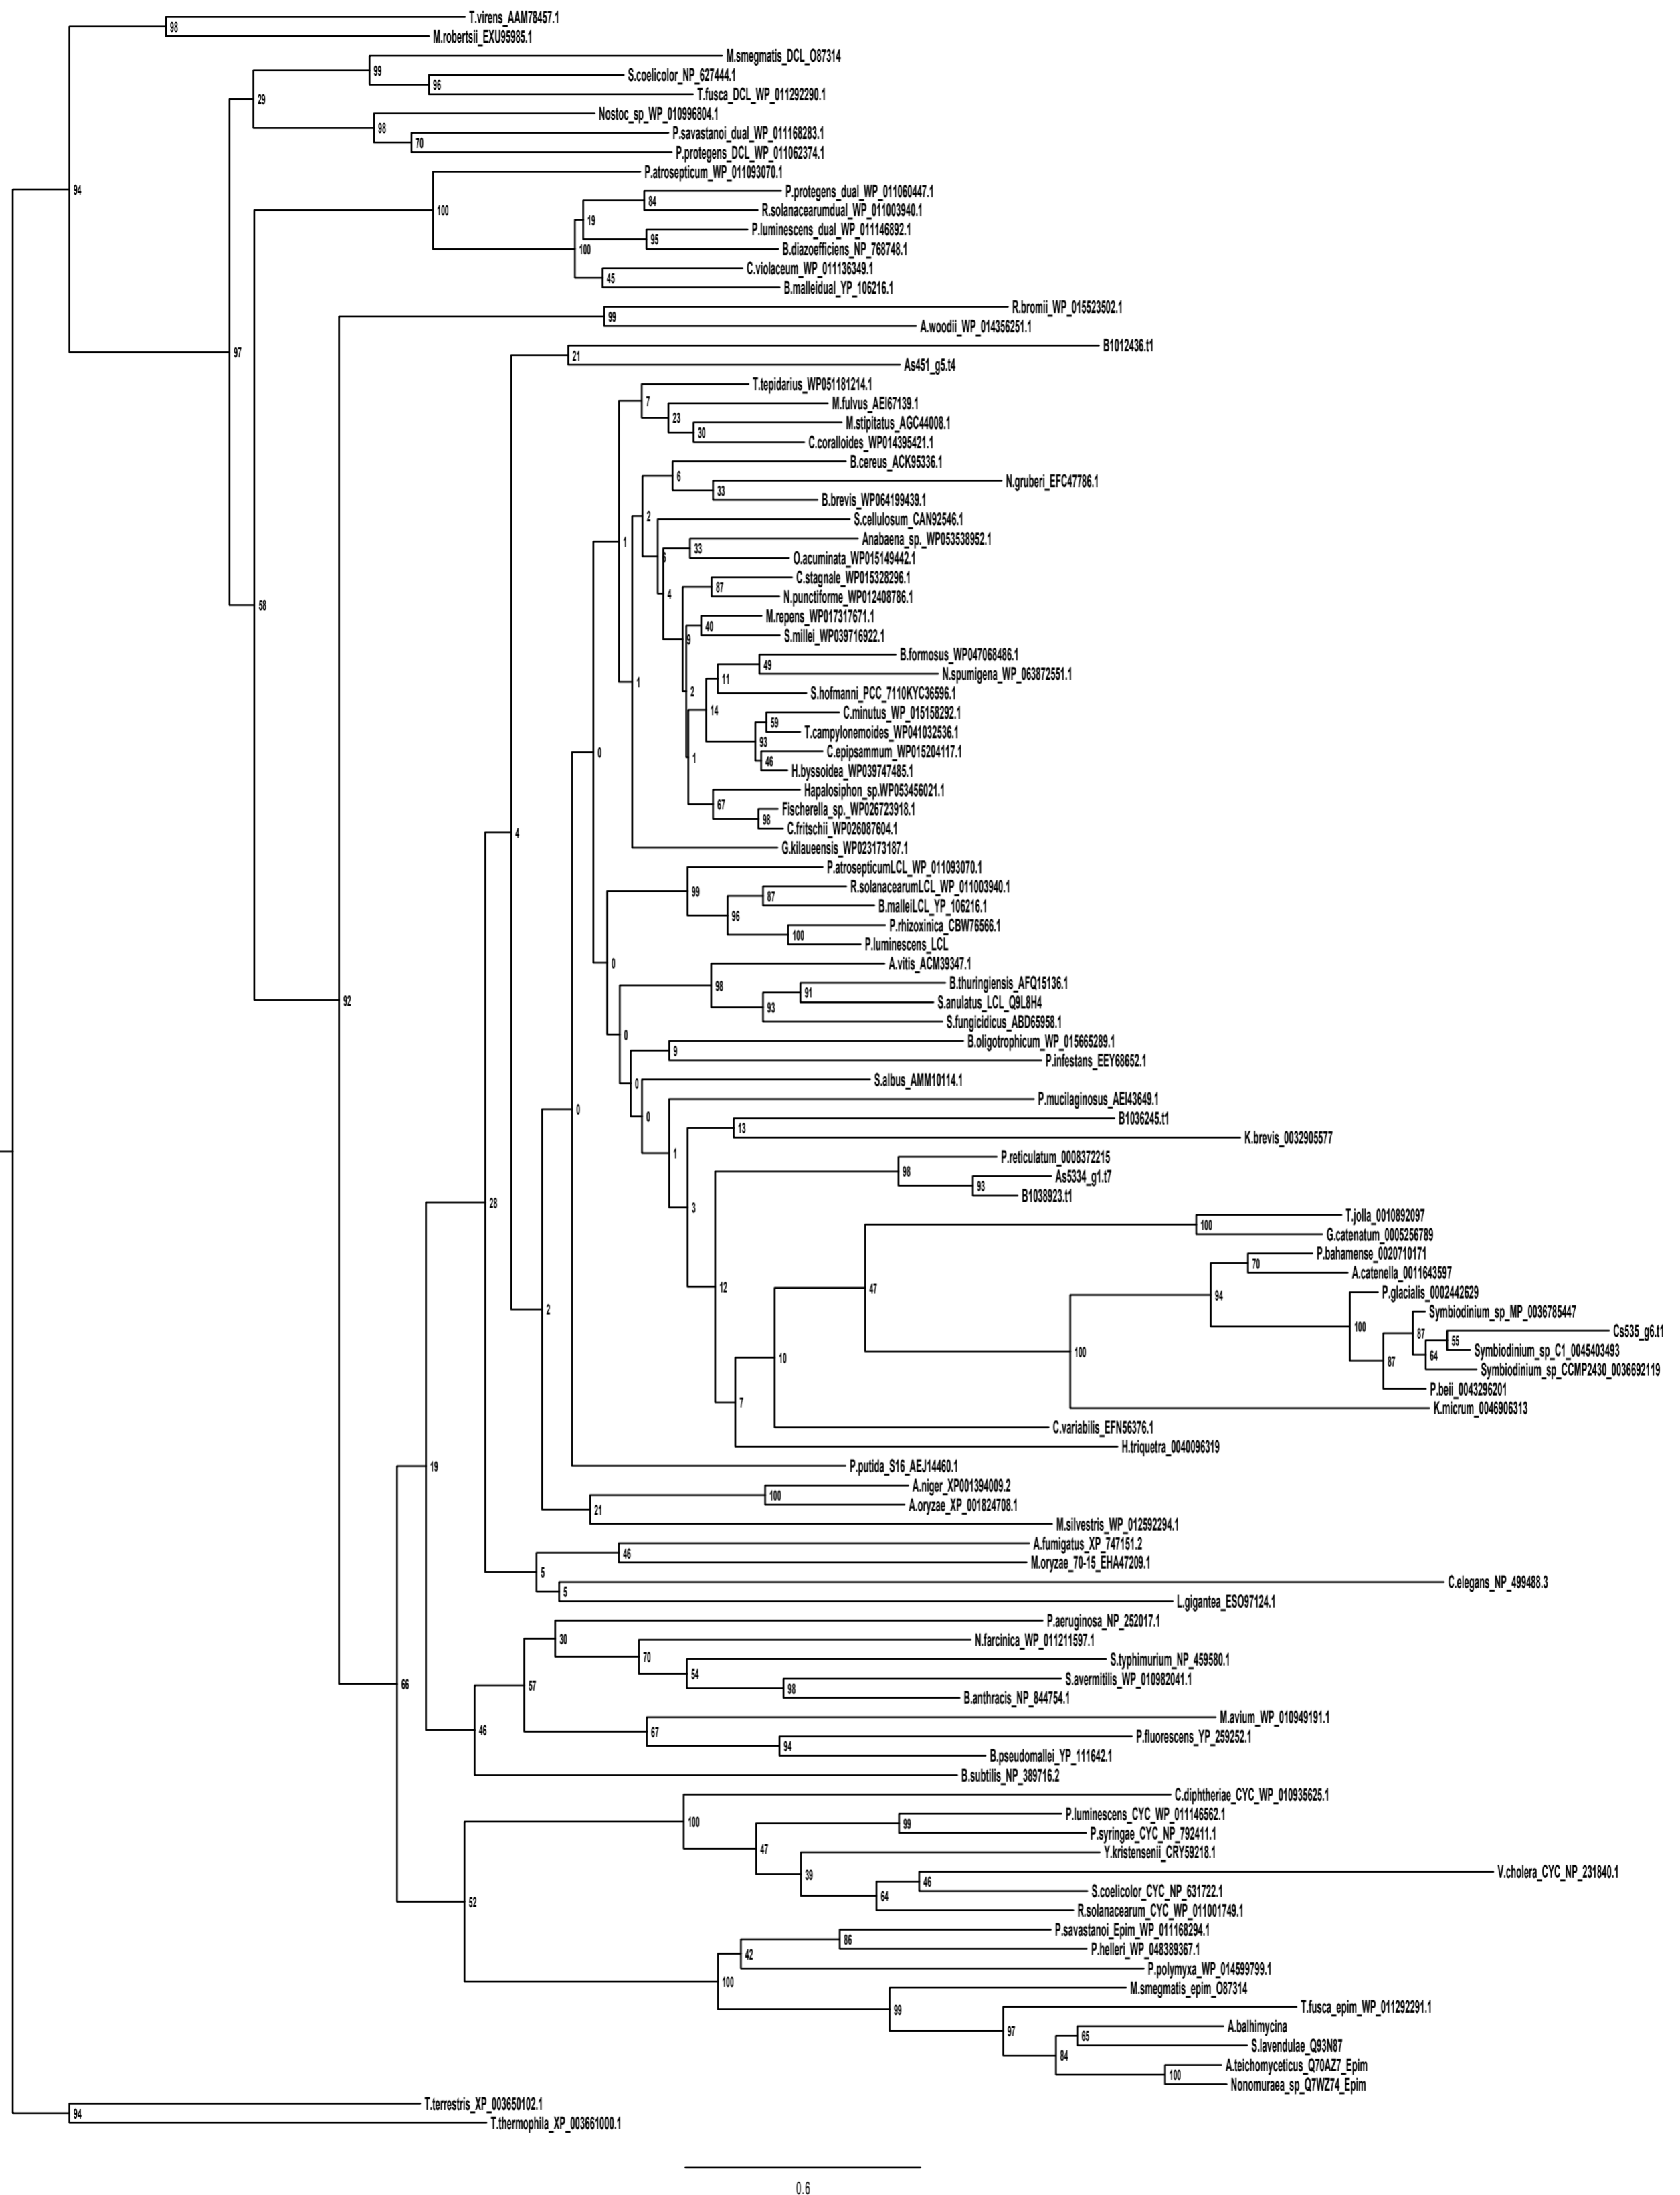

**Figure S10:** Molecular phylogenetic tree of condensation domain from prokaryotes and eukaryotes analyzed using maximum likelihood. Details regarding Symbiodinium sequences are provided in Supplementary Table S3.



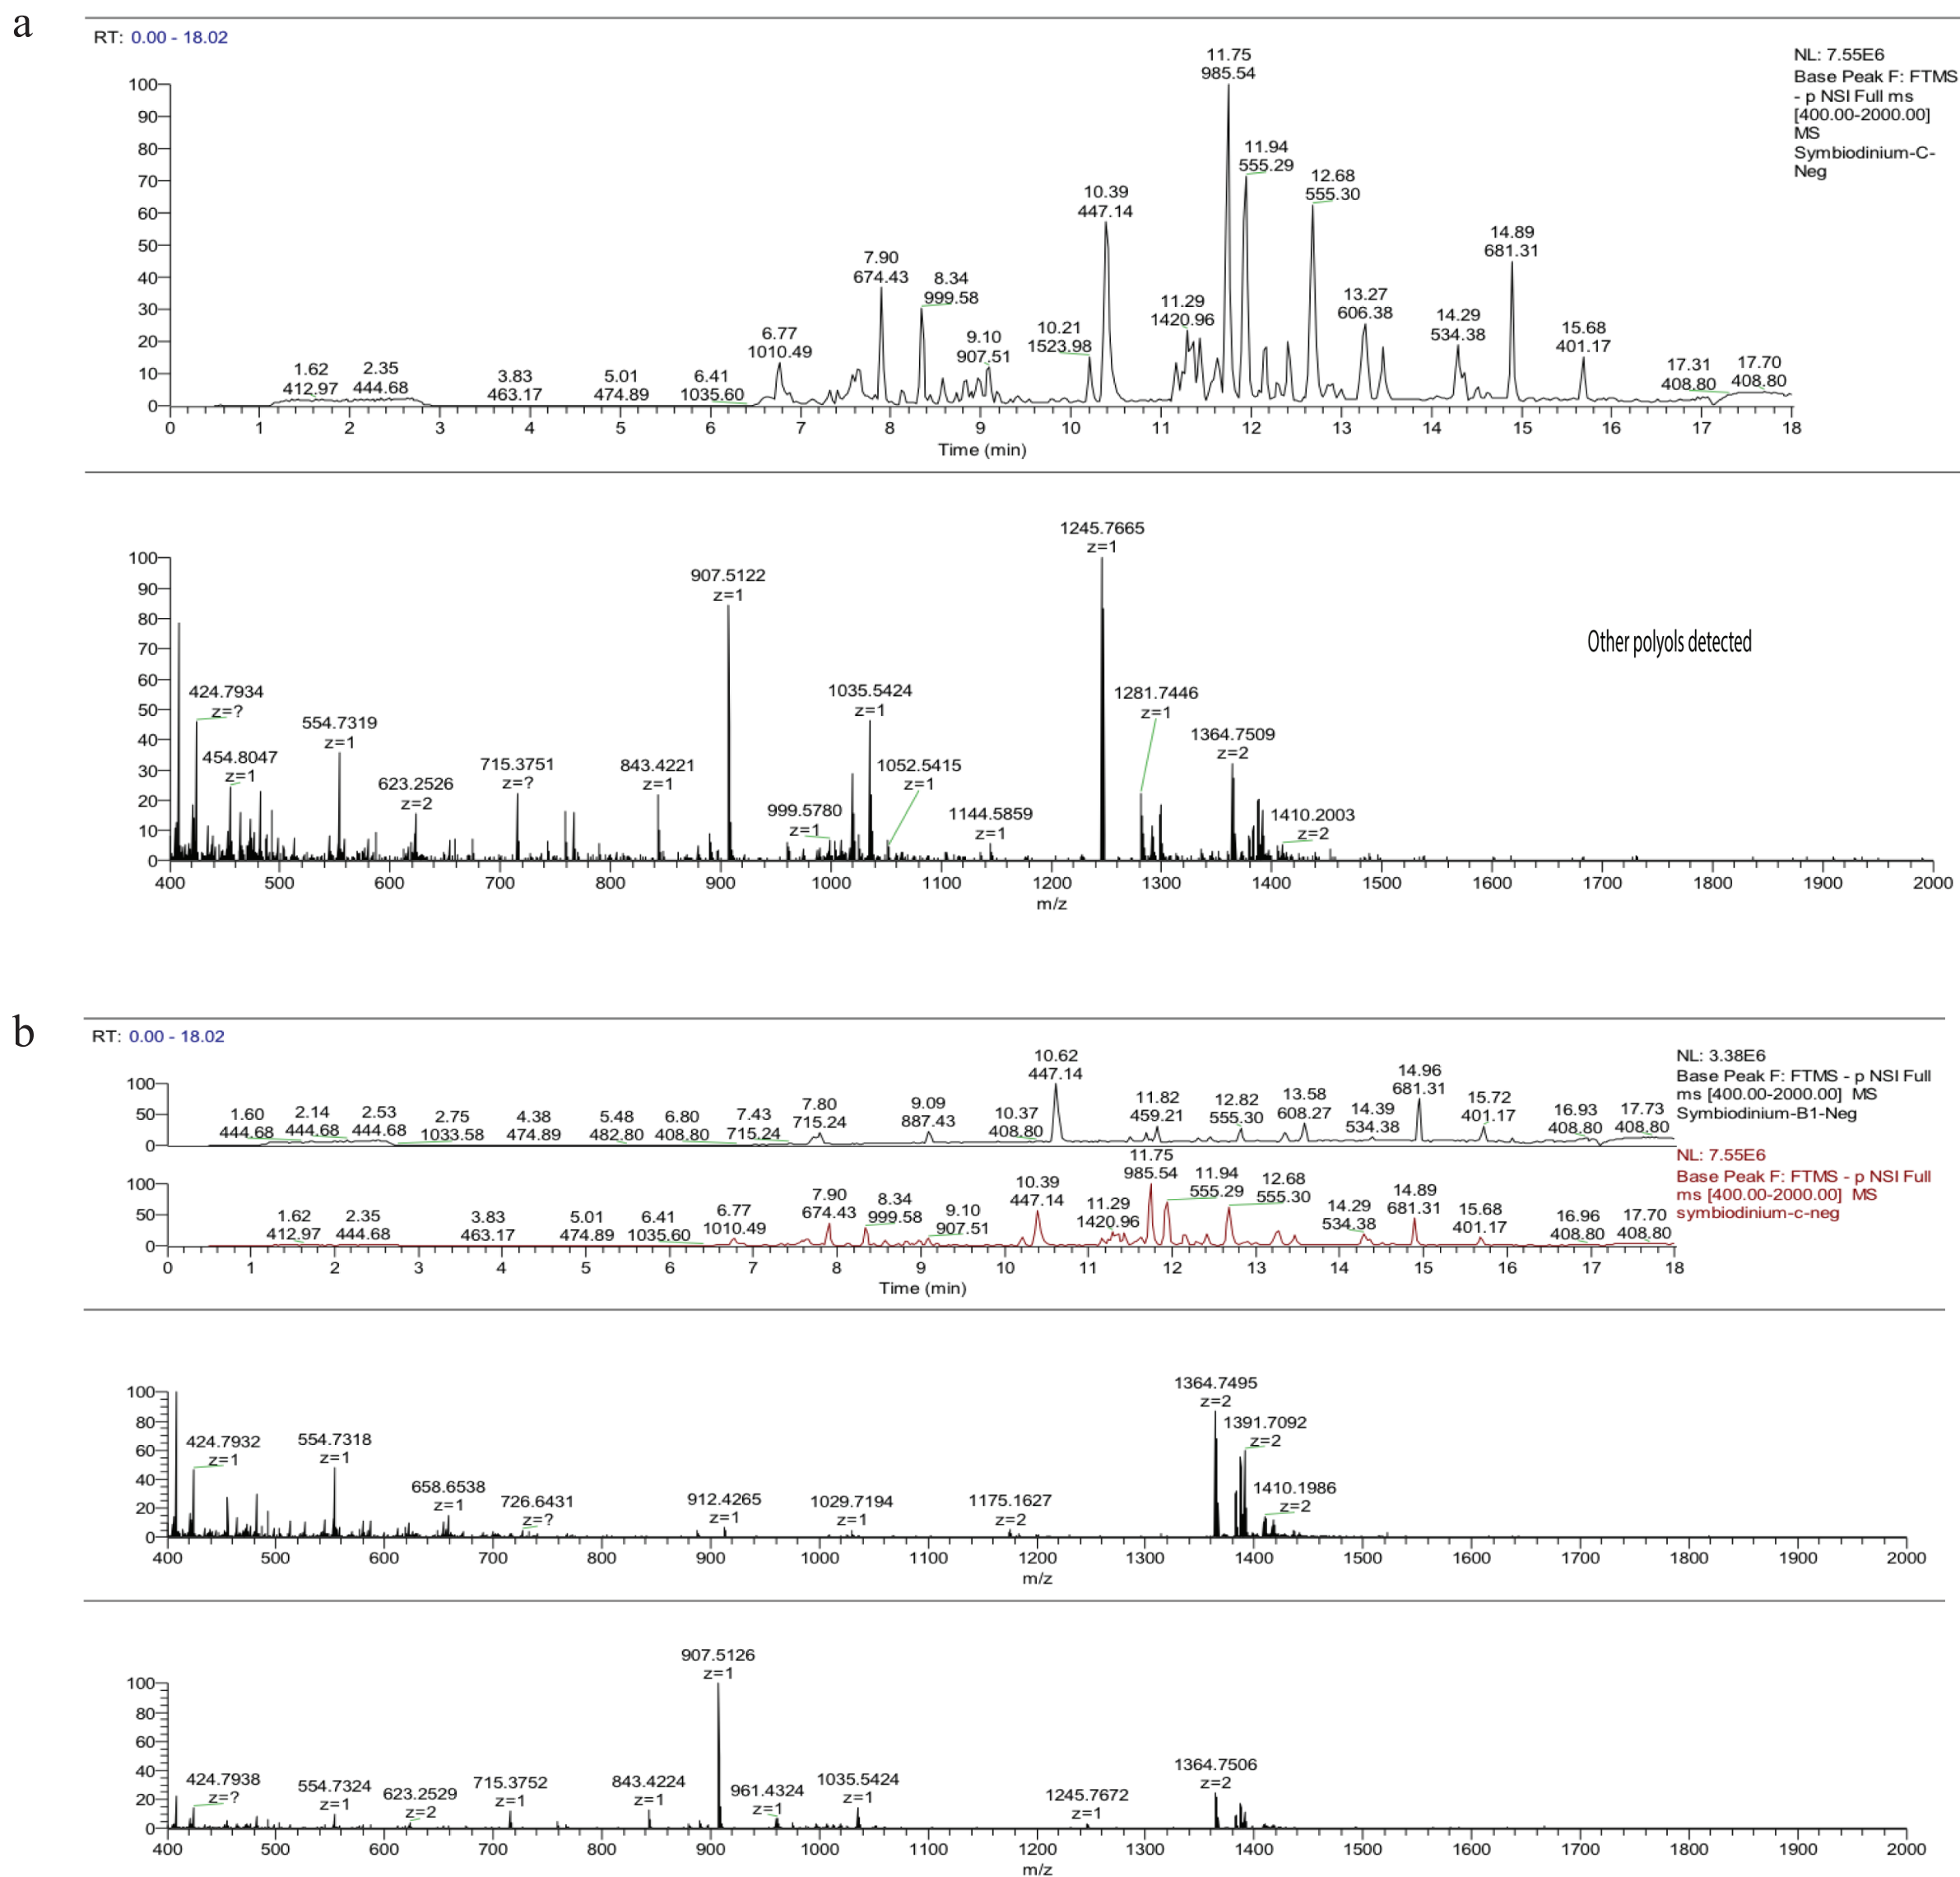

**Figure S12: a.** NanoLC-MS (negative ion) profile and mass spectrum (expanded) of the methanol extract of Clade C. **b.** Similarity of nanoLC-MS (negative ion) profile and mass spectrum (expanded) of the methanol extract of Clade C and B1.



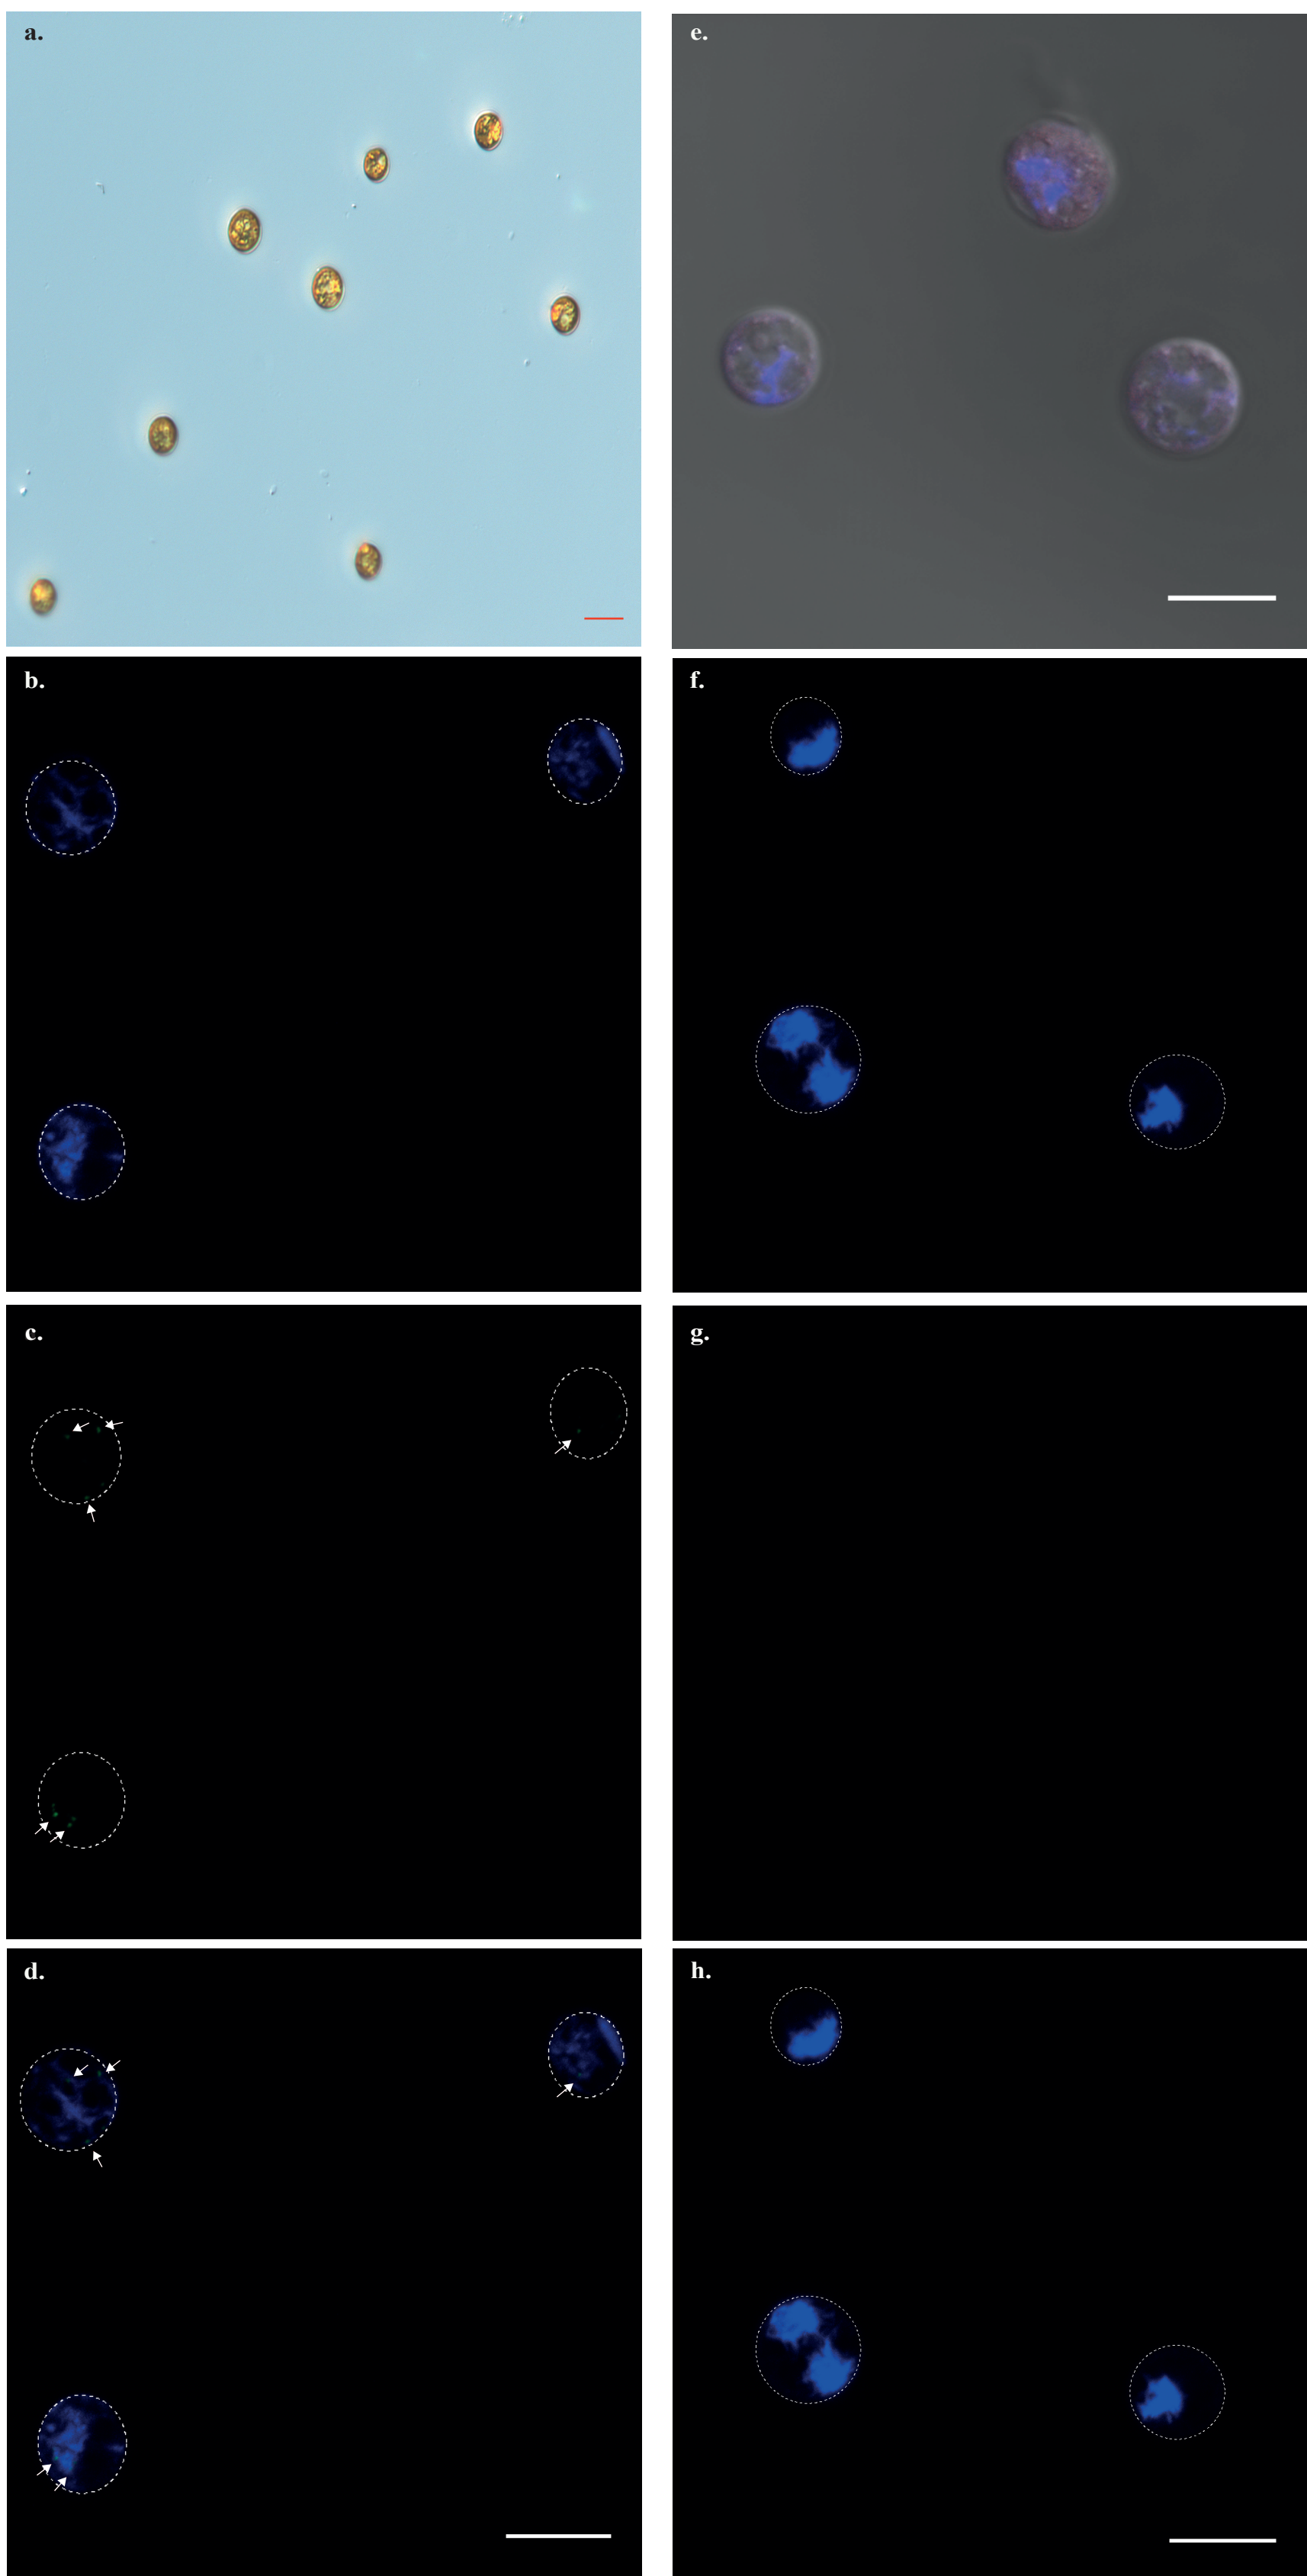

**Figure S13.** Immunofluorescent staining of Symbiodinium cells with anti-KS antibody. a. Differential interference contrast (DIC) imaging showing the spherical shape and internal complexity of cells at 40x magnification. b-d. Confocal images (63x) of clade C stained with KS antibody show localization of KS proteins (arrows). Nuclei are stained blue with DAPI (b), KS proteins are in green (c) and merged image of nuclei and KS protein staining (d) e. DIC imaging of cells at 63x showing detailed peripheral localization of chloroplasts (red autofluorescence) and nuclei (blue). f-h. Confocal images (63x) of control cells stained with only secondary antibody. Nuclei are stained with DAPI (f), no KS protein were stained (g) and merged image of nuclei and no-KS staining (h). White dotted lines show the cell outlines. Scale bars are 10  $\mu\text{m}$  in the panels.

Supplementary Table S1: Ketosynthase domain containing genes in *Symbiodinium* clades used in this study

| Gene ID<br>(as used in this<br>study)  | Total<br>AA | Pfam domain                                   | BLASTP best hit in<br>NCBI database<br>(Accession #) / Organism | E-<br>value | Identities/<br>Similarities<br>(% AA) | Scaffold # | Assembled<br>transcriptome ID |
|----------------------------------------|-------------|-----------------------------------------------|-----------------------------------------------------------------|-------------|---------------------------------------|------------|-------------------------------|
| symbB1.v1.2.015913.t1<br>(B1015913.t1) | 1671        | KS                                            | AQS99262.1<br><i>Gambierdiscus polynesiensis</i>                | 0           | 53/69                                 | 1171.1     | symbB1.comp20639_c0_seq1      |
| symbB1.v1.2.015790.t1<br>(B1015790.t1) | 427         | KS                                            | OLQ06784.1<br><i>Symbiodinium microadriaticum</i>               | 0           | 78/86                                 | 1186.1     | symbB1.comp52059_c0_seq1      |
| symbB1.v1.2.015789.t1<br>(B1015789.t1) | 1216        | KR-PP-KS                                      | OLQ06784.1<br><i>Symbiodinium microadriaticum</i>               | 0           | 73/81                                 | 1186.1     | symbB1.EST_k37c20_822         |
| symbB1.v1.2.017689.t1<br>(B1017689.t1) | 2261        | KS-Cupin 8                                    | OLP92465.1<br><i>Symbiodinium microadriaticum</i>               | 0           | 70/80                                 | 1368.1     | symbB1.EST_k37c20_37774       |
| symbB1.v1.2.019160.t1<br>(B1019160.t1) | 1068        | KS                                            | AQS99255.1<br><i>Gambierdiscus polynesiensis</i>                | 0           | 55/69                                 | 1555.1     | symbB1.EST_k37c20_8679        |
| symbB1.v1.2.002919.t1<br>(B1002919.t1) | 1105        | KS                                            | AQS99273.1<br><i>Gambierdiscus excentricus</i>                  | 0           | 52/67                                 | 160.1      | symbB1.EST_k37c20_17447       |
| symbB1.v1.2.020241.t1<br>(B1020241.t1) | 656         | KS                                            | AQS99271.1<br><i>Gambierdiscus excentricus</i>                  | 0           | 55/67                                 | 1693.1     | symbB1.EST_k37c20_3634        |
| symbB1.v1.2.022565.t1<br>(B1022565.t1) | 1547        | KS-CNBD                                       | OLP97452.1<br><i>Symbiodinium microadriaticum</i>               | 0           | 67/80                                 | 2011.1     | symbB1.EST_k37c20_6838        |
| symbB1.v1.2.028834.t1<br>(B1028834.t1) | 2431        | KS                                            | OLQ02136.1<br><i>Symbiodinium microadriaticum</i>               | 0           | 81/91                                 | 3094.1     | symbB1.EST_k37c20_17396       |
| symbB1.v1.2.030435.t1<br>(B1030435.t1) | 481         | KS-AT                                         | OLP78851.1<br><i>Symbiodinium microadriaticum</i>               | 6E-120      | 59/73                                 | 3430.1     | symbB1.comp58270_c0_seq1      |
| symbB1.v1.2.036410.t1<br>(B1036410.t1) | 3519        | A-KS-KR-PP-KS-DH-KR-PP-KS                     | OLP85931.1<br><i>Symbiodinium microadriaticum</i>               | 0           | 42/55                                 | 5132.1     | symbB1.comp56297_c0_seq6      |
| symbB1.v1.2.008781.t1<br>(B1008781.t1) | 2107        | DH-KR-PP-PP-KS-DH                             | OLQ06785.1<br><i>Symbiodinium microadriaticum</i>               | 0           | 80/85                                 | 514.1      | symbB1.comp69166_c0_seq1      |
| symbB1.v1.2.008782.t1<br>(B1008782.t1) | 1848        | KR-PP-KS-KR-PP-KS                             | OLQ06785.1<br><i>Symbiodinium microadriaticum</i>               | 0           | 75/84                                 | 514.1      | symbB1.comp53648_c0_seq1      |
| symbB1.v1.2.001928.t1<br>(B1001928.t1) | 1164        | KS                                            | AQS99229.1<br><i>Gambierdiscus excentricus</i>                  | 0           | 45/60                                 | 55.1       | symbB1.comp17616_c0_seq1      |
| symbB1.v1.2.001307.t1<br>(B1001307.t1) | 797         | KS                                            | OLP77034.1<br><i>Symbiodinium microadriaticum</i>               | 0           | 76/82                                 | 57.1       | symbB1.EST_k37c20_6869        |
| symbB1.v1.2.037839.t1<br>(B1037839.t1) | 604         | KS                                            | OLP95534.1<br><i>Symbiodinium microadriaticum</i>               | 0           | 81/91                                 | 5703.1     | symbB1.comp5164_c0_seq1       |
| symbB1.v1.2.040026.t1<br>(B1040026.t1) | 582         | KS                                            | AFW98411.1<br><i>Alexandrium ostenfeldii</i>                    | 0           | 68/81                                 | 6945.1     | symbB1.comp4031_c0_seq1       |
| symbB1.v1.2.013880.t1<br>(B1013880.t1) | 1071        | KS                                            | AQS99258.1<br><i>Gambierdiscus excentricus</i>                  | 0           | 40/57                                 | 991.1      | symbB1.comp24939_c0_seq1      |
| symbB1.v1.2.012436.t1<br>(B1012436.t1) | 10601       | See Figure 2 (Beedessee et al.,<br>2015)      | —                                                               | —           | —                                     | 860.1      | symbB1.comp70898_c0_seq1      |
| symbB1.v1.2.013202.t1<br>(B1013202.t1) | 940         | KS                                            | AQS99274.1<br><i>Gambierdiscus excentricus</i>                  | 0           | 51/65                                 | 929.1      | symbB1.comp10295_c0_seq1      |
| symbB1.v1.2.021684.t1<br>(B1021684.t1) | 805         | KS                                            | OLQ02729.1<br><i>Symbiodinium microadriaticum</i>               | 0           | 76/87                                 | 1888.1     | symbB1.comp7458_c0_seq1       |
| symbB1.v1.2.029496.t1<br>(B1029496.t1) | 4982        | VCBS-KS-DH-KR-PP-KS-KR-PP                     | OLP85322.1<br><i>Symbiodinium microadriaticum</i>               | 0           | 65/75                                 | 3236.1     | symbB1.comp53836_c0_seq1      |
| symbB1.v1.2.003781.t1<br>(B1003781.t1) | 4222        | KS-AT-DH-PP-ER(ADH_zinc)-<br>KR-DNA methylase | OLQ06785.1<br><i>Symbiodinium microadriaticum</i>               | 0           | 67/78                                 | 214.1      | symbB1.comp84707_c0_seq1      |
| symbB1.v1.2.017906.t1<br>(B1017906.t1) | 615         | KS                                            | OLP82529.1<br><i>Symbiodinium microadriaticum</i>               | 0           | 87/93                                 | 1404.1     | symbB1.comp2635_c0_seq1       |
| symbB1.v1.2.036344.t1<br>(B1036344.t1) | 722         | KS                                            | AQS99221.1<br><i>Gambierdiscus polynesiensis</i>                | 0           | 46/65                                 | 5099.1     | symbB1.comp13568_c0_seq1      |
| symbB1.v1.2.027671.t1<br>(B1027671.t1) | 957         | A-PP-KS-AT                                    | OLP83938.1<br><i>Symbiodinium microadriaticum</i>               | 0           | 72/79                                 | 2857.1     | symbB1.EST_k37c20_5813        |
| symbB1.v1.2.036002.t1<br>(B1036002.t1) | 2987        | A-PP-KS-KR-DH                                 | OLQ14315.1<br><i>Symbiodinium microadriaticum</i>               | 0           | 55/68                                 | 4981.1     | symbB1.EST_k37c20_11234       |

|                                        |      |                                            |                                                   |   |       |        |                          |
|----------------------------------------|------|--------------------------------------------|---------------------------------------------------|---|-------|--------|--------------------------|
| symbB1.v1.2.015788.t2<br>(B1015788.t2) | 920  | KR-PP-KS-AT                                | OLQ06784.1<br><i>Symbiodinium microadriaticum</i> | 0 | 75/84 | 1186.1 | symbB1.comp40305_c0_seq1 |
| symbB1.v1.2.000535.t1<br>(B1000535.t1) | 4838 | KS                                         | OLQ08992.1<br><i>Symbiodinium microadriaticum</i> | 0 | 42/59 | 31.1   | symbB1.EST_k37c20_11702  |
| s128_g23.t2<br>(As128_g23.t2)          | 879  | Heme oxygenase-KS-Heme oxygenase           | OLQ07573.1<br><i>Symbiodinium microadriaticum</i> | 0 | 88/88 | 128.1  | comp44668_c0_seq1        |
| s4308_g6.t1<br>(A s4308_g6.t1)         | 991  | KS                                         | OLP88203.1<br><i>Symbiodinium microadriaticum</i> | 0 | 99/99 | 4308.1 | comp28303_c0_seq1        |
| s3551_g7.t1<br>(As3551_g7.t1)          | 1027 | RRM1-RRM1-KS                               | OLP78656.1<br><i>Symbiodinium microadriaticum</i> | 0 | 94/95 | 3551.1 | comp8100_c0_seq1         |
| s1303_g11.t1<br>(As1303_g11.t1)        | 1353 | PKinase-KS                                 | OLP77034.1<br><i>Symbiodinium microadriaticum</i> | 0 | 78/80 | 1303.1 | comp29404_c0_seq1        |
| s1906_g6.t1<br>(As1906_g6.t1)          | 2244 | KS-RAP-Cyt-b5                              | OLP84449.1<br><i>Symbiodinium microadriaticum</i> | 0 | 93/93 | 1906.1 | comp41299_c0_seq1        |
| s652_g6.t1<br>(As652_g6.t1)            | 813  | Ank2-Ank2-Ank2-KS                          | OLQ02729.1<br><i>Symbiodinium microadriaticum</i> | 0 | 90/92 | 652.1  | comp39686_c0_seq1        |
| s1087_g8.t1<br>(As1087_g8.t1)          | 1902 | AAA-MgA_C-KS                               | AQS99273.1<br><i>Gambierdiscus excentricus</i>    | 0 | 51/67 | 1087.1 | comp34635_c0_seq1        |
| s4302_g9.t2<br>(As4302_g9.t2)          | 784  | KS                                         | OLP88440.1<br><i>Symbiodinium microadriaticum</i> | 0 | 98/98 | 4302.1 | comp34198_c0_seq1        |
| s2561_g15.t2<br>(As2561_g15.t2)        | 1033 | KS                                         | AQS99289.1<br><i>Gambierdiscus excentricus</i>    | 0 | 66/80 | 2561.1 | comp24392_c0_seq2        |
| s7155_g1.t1<br>(As7155_g1.t1)          | 1042 | KS                                         | OLP92465.1<br><i>Symbiodinium microadriaticum</i> | 0 | 83/84 | 7155.1 | comp33794_c0_seq1        |
| s3787_g5.t1<br>(As3787_g5.t1)          | 1188 | KS                                         | OLP97452.1<br><i>Symbiodinium microadriaticum</i> | 0 | 97/97 | 3787.1 | comp18293_c0_seq1        |
| s1323_g8.t1<br>(As1323_g8.t1)          | 1040 | KS                                         | AQS99262.1<br><i>Gambierdiscus excentricus</i>    | 0 | 52/69 | 1323.1 | comp6314_c0_seq1         |
| s2786_g5.t4<br>(As2786_g5.t4)          | 1245 | KS                                         | AQS99286.1<br><i>Gambierdiscus polynesiensis</i>  | 0 | 49/65 | 2786.1 | comp9936_c0_seq1         |
| s572_g26.t3<br>(As572_g26.t3)          | 2604 | RVT2-Fucokinase-KS                         | AQS99318.1<br><i>Gambierdiscus polynesiensis</i>  | 0 | 62/76 | 572.1  | comp30690_c0_seq1        |
| s1629_g33.t1<br>(As1629_g33.t1)        | 944  | KS                                         | OLP88021.1<br><i>Symbiodinium microadriaticum</i> | 0 | 85/85 | 1629.1 | comp28622_c0_seq1        |
| s5474_g6.t1<br>(As5474_g6.t1)          | 1160 | KS                                         | AQS99229.1<br><i>Gambierdiscus excentricus</i>    | 0 | 45/60 | 5474.1 | comp31618_c0_seq1        |
| s190_g20.t2<br>(A s190_g20.t2)         | 2172 | DH-ER(ADH_zinc)-KR-PP-KS-DH                | OLQ06784.1<br><i>Symbiodinium microadriaticum</i> | 0 | 77/85 | 190.1  | comp23579_c1_seq4        |
| s527_g6.t1<br>(As527_g6.t1)            | 1671 | ER(ADH_zinc)-PP-PP-KS-DH                   | OLQ06784.1<br><i>Symbiodinium microadriaticum</i> | 0 | 97/98 | 527.1  | comp23579_c0_seq1        |
| s988_g13.t1<br>(As988_g13.t1)          | 4258 | KS-DH-PP-KS-KR-PP-KS                       | OLP85322.1<br><i>Symbiodinium microadriaticum</i> | 0 | 80/83 | 988.1  | comp25448_c0_seq1        |
| s5992_g1.t1<br>(As5992_g1.t1)          | 2066 | KR-PP-KS-DH                                | OLP78851.1<br><i>Symbiodinium microadriaticum</i> | 0 | 87/90 | 5992.1 | comp8106_c0_seq1         |
| s190_g24.t1<br>(As190_g24.t1)          | 964  | PP-KS-KR                                   | OLQ06785.1<br><i>Symbiodinium microadriaticum</i> | 0 | 67/79 | 190.1  | comp73459_c0_seq1        |
| s527_g5.t1<br>(As527_g5.t1)            | 3108 | PP-KS-KR-PP-KS-KR-PP-KS-DH                 | OLQ06785.1<br><i>Symbiodinium microadriaticum</i> | 0 | 88/89 | 527.1  | comp74995_c0_seq1        |
| s508_g32.t1<br>(As508_g32.t1)          | 1754 | A-KS-TE                                    | OLP95547.1<br><i>Symbiodinium microadriaticum</i> | 0 | 92/65 | 508.1  | comp27989_c0_seq1        |
| s190_g19.t1<br>(As190_g19.t1)          | 3439 | KR-PP-KS-KR-PP-KS-DH-ER(ADH_zinc)-KR-PP-TE | OLQ06784.1<br><i>Symbiodinium microadriaticum</i> | 0 | 84/88 | 190.1  | comp27159_c0_seq1        |
| s527_g8.t1<br>(As527_g8.t1)            | 2930 | KR-PP-KS-KR-PP-KS-DH-ER(ADH_zinc)-KR       | OLQ06784.1<br><i>Symbiodinium microadriaticum</i> | 0 | 91/92 | 527.1  | comp27159_c0_seq1        |
| s892_g17<br>(Cs892_g17)                | 976  | KS                                         | OLQ02136.1<br><i>Symbiodinium microadriaticum</i> | 0 | 82/90 | 892.1  | comp29141_c0_seq1        |
| s809_g5<br>(Cs809_g5.t1)               | 2768 | RVT2-AAA-MgsA_C-KS                         | AQS99273.1<br><i>Gambierdiscus excentricus</i>    | 0 | 47/63 | 809.1  | comp43784_c0_seq1        |
| s894_g33.t1<br>(Cs894_g33.t1)          | 789  | KS                                         | AQS99271.1<br><i>Gambierdiscus excentricus</i>    | 0 | 53/66 | 894.1  | comp27826_c0_seq1        |
| s574_g7.t3<br>(Cs574_g7.t3)            | 824  | KS                                         | AQS99286.1<br><i>Gambierdiscus polynesiensis</i>  | 0 | 51/66 | 574.1  | comp37107_c0_seq1        |

|                                     |      |                                                |                                                   |               |       |        |                   |
|-------------------------------------|------|------------------------------------------------|---------------------------------------------------|---------------|-------|--------|-------------------|
| s144_g38.t1<br>(Cs144_g38.t1)       | 1761 | TPR12-TPR12-KS                                 | AIW63286.1<br><i>Azadinium spinosum</i>           | 0             | 63/77 | 144.1  | comp24864_c0_seq1 |
| s2246_g6.t1.t1<br>(Cs2246_g6.t1.t1) | 3744 | RVT2-LR-KS                                     | OLQ08682.1<br><i>Symbiodinium microadriaticum</i> | 0             | 55/67 | 2246.1 | comp46226_c0_seq1 |
| s3847_g4.t1<br>(Cs3847_g4.t1)       | 2777 | KS-cNMP-cNMP-cNMP-cNMP-<br>cNMP-cNMP-cNMP-cNMP | OLP97452.1<br><i>Symbiodinium microadriaticum</i> | 0             | 68/81 | 3847.1 | comp14688_c0_seq1 |
| s929_g10.t1<br>(Cs929_g10.t1)       | 1029 | KS                                             | OLP88203.1<br><i>Symbiodinium microadriaticum</i> | 0             | 85/92 | 929.1  | comp26470_c0_seq1 |
| s121_g22.t1<br>(Cs121_g22.t1)       | 1021 | KS                                             | AQS99258.1<br><i>Gambierdiscus excentricus</i>    | 0             | 51/67 | 121.1  | comp26243_c0_seq1 |
| s1154_g4.t1<br>(Cs1154_g4.t1)       | 949  | KS                                             | AQS99197.1<br><i>Gambierdiscus polynesiensis</i>  | 0             | 58/71 | 1154.1 | comp6775_c0_seq1  |
| s612_g34.t1<br>(Cs612_g34.t1)       | 1070 | KS                                             | AQS99258.1<br><i>Gambierdiscus excentricus</i>    | 0             | 42/57 | 612.1  | comp34408_c0_seq1 |
| s1817_g11.t1<br>(Cs1817_g11.t1)     | 1185 | KS-KS                                          | OLP84449.1<br><i>Symbiodinium microadriaticum</i> | 0             | 66/76 | 1817.1 | comp31553_c0_seq1 |
| s895_g13.t1<br>(Cs895_g13.t1)       | 1989 | KS-FA_hydroxylase-Cyt-b5                       | AQS99270.1<br><i>Gambierdiscus excentricus</i>    | 0             | 53/67 | 895.1  | comp31899_c0_seq1 |
| s1080_g21.t1<br>(Cs1080_g21.t1)     | 788  | KS                                             | AQS99274.1<br><i>Gambierdiscus excentricus</i>    | 0             | 51/65 | 1080.1 | comp26500_c0_seq1 |
| s684_g8.t1<br>(Cs684_g8.t1)         | 948  | KS                                             | AQS99289.1<br><i>Gambierdiscus excentricus</i>    | 0             | 65/80 | 684.1  | comp23033_c0_seq1 |
| s228_g31.t1<br>(Cs228_g31.t1)       | 2293 | Calx_beta-ABC_tran-KS                          | AQS99262.1<br><i>Gambierdiscus polynesiensis</i>  | 0             | 54/70 | 228.1  | comp32811_c0_seq1 |
| s1281_g4.t1<br>(Cs1281_g4.t1)       | 3069 | ER(ADH_zinc)-PP-PP-KS-DH-<br>KR-PP-KS          | OLQ06784.1<br><i>Symbiodinium microadriaticum</i> | 0             | 78/85 | 1281.1 | comp19708_c0_seq1 |
| s1052_g9.t1<br>(Cs1052_g9.t1)       | 2164 | DH-ER(ADH-zinc)-PP-KS-DH                       | OLP78851.1<br><i>Symbiodinium microadriaticum</i> | 0             | 50/65 | 1052.1 | comp4200_c0_seq1  |
| s1029_g9.t1<br>(Cs1029_g9.t1)       | 3843 | KR-PP-KS-AT-DH-KR-KS-KR-<br>PP-KS              | OLQ06785.1<br><i>Symbiodinium microadriaticum</i> | 0             | 62/71 | 1029.1 | comp60043_c0_seq1 |
| s357_g50.t1<br>(Cs357_g50.t1)       | 3523 | KS-DH-KR-PP-KS-KR-PP-KS-<br>DH-TPR12-PP        | OLP85322.1<br><i>Symbiodinium microadriaticum</i> | 0             | 66/75 | 357.1  | comp14008_c0_seq1 |
| s1029_g13.t1<br>(Cs1029_g13.t1)     | 1142 | KS                                             | OLQ06783.1<br><i>Symbiodinium microadriaticum</i> | 0             | 73/80 | 1029.1 | comp1496_c1_seq1  |
| s1344_g2.t4<br>(Cs1344_g2.t4)       | 3413 | A-KR-KS-KR-PP-Hexapep                          | XP_005847910.1<br><i>Chlorella variabilis</i>     | 9E-100        | 50/65 | 1344.1 | comp3199_c0_seq1  |
| s1074_g13.t1<br>(Cs1074_g13.t1)     | 1271 | A-PP-KS                                        | OLP83938.1<br><i>Symbiodinium microadriaticum</i> | 0             | 77/86 | 1074.1 | comp14731_c0_seq1 |
| s193_g13.t1<br>(Cs193_g13.t1)       | 1763 | A-PP-KS-KR-DH                                  | OLQ14315.1<br><i>Symbiodinium microadriaticum</i> | 0             | 55/69 | 193.1  | comp32064_c0_seq1 |
| s202_g11.t1<br>(Cs202_g11.t1)       | 913  | KS-PP                                          | AQS99203.1<br><i>Gambierdiscus excentricus</i>    | 4.00E-<br>145 | 43/57 | 202.1  | comp21095_c0_seq1 |

CNBD: Cyclic nucleotide-binding domain; AH: Aspartyl/Asparaginyl beta-hydroxylase; A: AMP-binding ; PP: PP-binding ; KR: Ketoreductase ; DH:dehydratase ; ER:Enoylreductase ; MT-methyltransferase

Supplementary Table S2: Acyltransferase domain containing genes in *Symbiodinium* clades used in this study

| Gene ID<br>(as used in this study)     | Total AA | Pfam domain                                | BLASTP best hit in NCBI database<br>(Accession #) / Organism | E-value | Identities/<br>Similarities<br>(% AA) | Scaffold # | Assembled transcriptome ID |
|----------------------------------------|----------|--------------------------------------------|--------------------------------------------------------------|---------|---------------------------------------|------------|----------------------------|
| symbB1.v1.2.039996.t1<br>(B1039996.t1) | 811      | KS-AT-DH                                   | OLQ06785.1<br><i>Symbiodinium microadriaticum</i>            | 0       | 73/84                                 | 6924.1     | symbB1.comp85342_c0_seq1   |
| symbB1.v1.2.003781.t1<br>(B1003781.t1) | 4222     | KS-AT-DH-ER(ADH_zinc)-<br>KR-DNA_methylase | OLQ06785.1<br><i>Symbiodinium microadriaticum</i>            | 0       | 67/78                                 | 214.1      | symbB1.comp94108_c0_seq1   |
| symbB1.v1.2.012436.t1<br>(B1012436.t1) | 10601    | See figure 2                               | —                                                            | —       | —                                     | 860.1      | symbB1.comp70898_c0_seq1   |
| symbB1.v1.2.026318.t1<br>(B1026318.t1) | 512      | Ank-AT                                     | OLQ10833.1<br><i>Symbiodinium microadriaticum</i>            | 1E-99   | 50/55                                 | 2620.1     | symbB1.comp29994_c0_seq1   |
| symbB1.v1.2.012467.t1<br>(B1012467.t1) | 592      | AT                                         | OLP88585.1<br><i>Symbiodinium microadriaticum</i>            | 0       | 89/95                                 | 858.1      | symbB1.comp14991_c0_seq1   |
| symbB1.v1.2.015532.t1<br>(B1015532.t1) | 750      | HEAT-AT                                    | OLQ05112.1<br><i>Symbiodinium microadriaticum</i>            | 0       | 66/77                                 | 1161.1     | symbB1.comp33473_c0_seq1   |
| symbB1.v1.2.020811.t1<br>(B1020811.t1) | 426      | —                                          | OLP78475.1<br><i>Symbiodinium microadriaticum</i>            | 5E-38   | 35/49                                 | 1768.1     | symbB1.comp22872_c0_seq1   |
| symbB1.v1.2.022906.t1<br>(B1022906.t1) | 2678     | AT-Pkinase-Cupin_4                         | OLP80999.1<br><i>Symbiodinium microadriaticum</i>            | 3E-137  | 51/65                                 | 2052.1     | symbB1.comp62393_c0_seq1   |
| symbB1.v1.2.032358.t1<br>(B1032358.t1) | 474      | AT                                         | OLP82995.1<br><i>Symbiodinium microadriaticum</i>            | 0       | 85/93                                 | 3874.1     | symbB1.comp513_c1_seq1     |
| symbB1.v1.2.018170.t1<br>(B1018170.t1) | 1162     | Ank-AT-FKBP_C                              | OLQ01506.1<br><i>Symbiodinium microadriaticum</i>            | 0       | 67/77                                 | 1438.1     | symbB1.comp18682_c0_seq1   |
| s2684_g3.t1<br>(As2684_g3.t1)          | 1080     | AT                                         | OLP78475.1<br><i>Symbiodinium microadriaticum</i>            | 0       | 95/97                                 | 2684.1     | comp21089_c0_seq2          |
| s41_g7.t1<br>(As41_g7.t1)              | 553      | AT                                         | OLP87520.1<br><i>Symbiodinium microadriaticum</i>            | 0       | 89/90                                 | 41.1       | comp30651_c0_seq1          |
| s1206_g16.t1<br>(As1206_g16.t1)        | 593      | Ank-AT                                     | OLP88585.1<br><i>Symbiodinium microadriaticum</i>            | 0       | 98/98                                 | 1206.1     | comp28052_c0_seq1          |
| s4164_g5.t1<br>(As4164_g5.t1)          | 723      | HEAT-HEAT-HEAT-HEAT-AT                     | OLQ05112.1<br><i>Symbiodinium microadriaticum</i>            | 0       | 89/91                                 | 4164.1     | comp32220_c0_seq1          |
| s126_g21.t1<br>(As126_g21.t1)          | 957      | AT                                         | OLP88585.1<br><i>Symbiodinium microadriaticum</i>            | 6E-77   | 33/48                                 | 126.1      | comp32072_c0_seq1          |
| s7547_g2.t1<br>(As7547_g2.t1)          | 545      | AT                                         | OLP85020.1<br><i>Symbiodinium microadriaticum</i>            | 0       | 94/98                                 | 7547.1     | comp46533_c0_seq1          |
| s1018_g3.t1<br>(As1018_g3.t1)          | 732      | AT                                         | OLQ01506.1<br><i>Symbiodinium microadriaticum</i>            | 2E-35   | 36/56                                 | 1018.1     | comp20971_c0_seq1          |
| s665_g11.t1<br>(As665_g11.t1)          | 342      | —                                          | OLP99092.1<br><i>Symbiodinium microadriaticum</i>            | 1E-110  | 88/92                                 | 665.1      | comp36726_c0_seq1          |
| s3570_g15.t1<br>(As3570_g15.t1)        | 601      | AT                                         | OLP82995.1<br><i>Symbiodinium microadriaticum</i>            | 0       | 87/87                                 | 3570.1     | comp27427_c0_seq1          |
| s138_g8.t1<br>(As138_g8.t1)            | 612      | AT                                         | OLQ01506.1<br><i>Symbiodinium microadriaticum</i>            | 0       | 92/95                                 | 138.1      | comp58116_c0_seq1          |
| s792_g3.t2<br>(As792_g3.t2)            | 535      | AT                                         | AQS99288.1<br><i>Gambierdiscus belizeanus</i>                | 4E-166  | 79/87                                 | 792.1      | comp29039_c0_seq1          |
| s3019_g1.t3<br>(Cs3019_g1.t3)          | 1085     | KR-PP-KS-AT                                | AQS99305.1<br><i>Gambierdiscus polynesiensis</i>             | 0       | 58/71                                 | 3019.1     | comp62915_c0_seq1          |
| s24_g36.t1<br>(Cs24_g36.t1)            | 590      | AT                                         | OLP87520.1<br><i>Symbiodinium microadriaticum</i>            | 0       | 75/83                                 | 24.1       | comp24242_c0_seq1          |
| s429_g17.t1<br>(Cs429_g17.t1)          | 1920     | RRM2-AT                                    | OLP88585.1<br><i>Symbiodinium microadriaticum</i>            | 0       | 88/94                                 | 429.1      | comp6509_c1_seq1           |
| s2692_g2.t1<br>(Cs2692_g2.t1)          | 502      | HEAT-AT                                    | OLQ05112.1<br><i>Symbiodinium microadriaticum</i>            | 0       | 71/81                                 | 2692.1     | comp33492_c0_seq1          |
| s893_g20.t1<br>(Cs893_g20.t1)          | 998      | AT-DUF3179                                 | OLP77179.1<br><i>Symbiodinium microadriaticum</i>            | 0       | 64/73                                 | 893.1      | comp33060_c0_seq1          |
| s118_g27.t1<br>(Cs118_g27.t1)          | 898      | AT                                         | OLP85020.1<br><i>Symbiodinium microadriaticum</i>            | 2E-75   | 74/83                                 | 118.1      | comp42492_c0_seq1          |
| s1269_g23.t3<br>(Cs1269_g23.t3)        | 931      | lon_trans                                  | OLP95654.1<br><i>Symbiodinium microadriaticum</i>            | 0       | 55/66                                 | 1269.1     | comp7307_c0_seq1           |

|                                 |      |               |                                                   |       |       |        |                   |
|---------------------------------|------|---------------|---------------------------------------------------|-------|-------|--------|-------------------|
| s1989_g18.t1<br>(Cs1989_g18.t1) | 741  | AT            | OLQ01506.1<br><i>Symbiodinium microadriaticum</i> | 1E-89 | 54/71 | 1989.1 | comp41384_c0_seq1 |
| s2315_g3.t1<br>(Cs2315_g3.t1)   | 446  | AT            | OLP82995.1<br><i>Symbiodinium microadriaticum</i> | 0     | 79/88 | 2315.1 | comp22776_c0_seq1 |
| s1441_g2.t1<br>(Cs1441_g2.t1)   | 1134 | Ank-AT-FKBP_C | OLQ01506.1<br><i>Symbiodinium microadriaticum</i> | 0     | 69/76 | 1441.1 | comp29346_c0_seq1 |

Ank: ankyrin repeat ; PP: PP-binding; KR: Ketoreductase ; DH: dehydratase; KS: ketosynthase ; DH:dehydratase ; ER:Enoylreductase

Supplementary Table S3: Condensation domain containing genes in *Symbiodinium* clades used in this study

| Gene ID<br>(as used in this study)     | Total AA | Pfam domain                              | BLASTP best hit in NCBI database<br>(Accession #) / Organism | E-value | Identities/<br>Similarities<br>(% AA) | Scaffold # | Assembled transcriptome ID |
|----------------------------------------|----------|------------------------------------------|--------------------------------------------------------------|---------|---------------------------------------|------------|----------------------------|
| s451_g5.t4<br>(As451_g5.t4)            | 2455     | tRNA-synt2-A-PP-C                        | OLP93967.1<br><i>Symbiodinium microadriaticum</i>            | 0       | 92/94                                 | 451.1      | comp28462_c0_seq1          |
| s5334_g1.t7<br>(As5334_g1.t7)          | 2613     | A-PP-C-A-PP-NAD_binding4                 | BAZ14320.1<br><i>Calothrix sp. NIES-4071</i>                 | 1E-151  | 35/53                                 | 5334.1     | comp26380_c0_seq1          |
| symbB1.v1.2.012436.t1<br>(B1012436.t1) | 10601    | See Figure 2<br>(Beedessee et al., 2015) | –                                                            | –       | –                                     | 860.1      | symbB1.comp70898_c0_seq1   |
| symbB1.v1.2.036245.t1<br>(B1036245.t1) | 1688     | A-PP-C-A                                 | SFJ64597.1<br><i>Thermoflavimicrobium dichotomicum</i>       | 0       | 31/48                                 | 5072.1     | symbB1.comp61452_c0_seq1   |
| symbB1.v1.2.038923.t1<br>(B038923.t1)  | 1424     | A-PP-C-A                                 | BAZ14320.1<br><i>Calothrix sp. NIES-4071</i>                 | 7E-148  | 36/53                                 | 6242.1     | symbB1.comp49186_c0_seq1   |
| s535_g6.t1<br>(Cs535_g6.t1)            | 1661     | C-Ank-Ank-Ank-Ank-Ank                    | OLP79889.1<br><i>Symbiodinium microadriaticum</i>            | 0       | 86/93                                 | 535.1      | comp20892_c1_seq1          |

Ank: ankyrin repeat ; A: AMP-binding ; C: condensation ; PP: PP-binding

Supplementary Table S4: Adenylation domain containing genes in *Symbiodinium* clades used in this study

| Gene ID<br>(as used in this study)     | Total<br>AA | Pfam domain                              | BLASTP best hit in NCBI<br>database<br>(Accession #) / Organism | E-value | Identities/<br>Similarities<br>(% AA) | Scaffold # | Assembled<br>transcriptome ID |
|----------------------------------------|-------------|------------------------------------------|-----------------------------------------------------------------|---------|---------------------------------------|------------|-------------------------------|
| s112_g4.t1<br>(As112_g4.t1)            | 1489        | A-SAS_6-Pkinase                          | OLP94465.1<br><i>Symbiodinium microadriaticum</i>               | 0       | 83/85                                 | 112.1      | comp36390_c0_seq1             |
| s1249_g3.t2<br>(As1249_g3.t2)          | 1186        | A-DUF1796                                | OLQ07141.1<br><i>Symbiodinium microadriaticum</i>               | 0       | 77/80                                 | 1249.1     | comp19601_c0_seq1             |
| s1272_g6.t1<br>(As1272_g6.t1)          | 1176        | A                                        | OLP80648.1<br><i>Symbiodinium microadriaticum</i>               | 0       | 92/93                                 | 1272.1     | comp45077_c0_seq1             |
| s1794_g4.t1<br>(As1794_g4.t1)          | 2175        | A-MT_31-PP-TE                            | OLQ01805.1<br><i>Symbiodinium microadriaticum</i>               | 0       | 94/95                                 | 1794.1     | comp36046_c0_seq1             |
| s1249_g3.t2<br>(As1249_g3.t2)          | 2400        | A-Thioredoxin_8-A-MT_24                  | OLP92825.1<br><i>Symbiodinium microadriaticum</i>               | 1E-151  | 58/60                                 | 1977.1     | comp33669_c0_seq1             |
| s2138_g2.t1<br>(As2138_g2.t1)          | 1009        | A                                        | OLQ05334.1<br><i>Symbiodinium microadriaticum</i>               | 0       | 95/96                                 | 2138.1     | comp7456_c0_seq1              |
| As3629_g2.t1<br>(As3629_g2.t1)         | 708         | A-PP                                     | OLP84418.1<br><i>Symbiodinium microadriaticum</i>               | 0       | 91/94                                 | 3629.1     | comp23816_c0_seq1             |
| As451_g6.t3<br>(As451_g6.t3)           | 3368        | A-PP-C-A-PP-TE-zf_UBR                    | WP_010249951.1<br><i>Acetivibrio cellulolyticus</i>             | 0       | 30/47                                 | 451.1      | comp20515_c0_seq1             |
| s5334_g1.t7<br>(As5334_g1.t7)          | 2613        | A-PP-C-A-PP-NAD_binding4                 | BAZ14320.1<br><i>Calothrix sp. NIES-4071</i>                    | 1E-151  | 35/53                                 | 5334.1     | comp26380_c0_seq1             |
| As6285_g1.t1<br>(As6285_g1.t1)         | 1215        | A                                        | OLP79924.1<br><i>Symbiodinium microadriaticum</i>               | 0       | 92/94                                 | 6285.1     | comp32724_c0_seq1             |
| As745_g3.t1<br>(As745_g3.t1)           | 1735        | A-PP                                     | OLP85140.1<br><i>Symbiodinium microadriaticum</i>               | 0       | 68/77                                 | 745.1      | comp26832_c1_seq1             |
| symbB1.v1.2.012436.t1<br>(B1012436.t1) | 10601       | See Figure 2<br>(Beedessee et al., 2015) | -                                                               | -       | -                                     | 860.1      | symbB1.comp70898_c0_seq1      |
| symbB1.v1.2.012575.t2<br>(B1012575.t2) | 1893        | A-Ank                                    | OLQ14049.1<br><i>Symbiodinium microadriaticum</i>               | 0       | 71/79                                 | 851.1      | symbB1.comp40116_c0_seq1      |
| symbB1.v1.2.016581.t1<br>(B1016581.t1) | 1169        | A                                        | WP_012411748.1<br><i>Nostoc punctiforme</i>                     | 6E-65   | 32/49                                 | 1253.1     | symbB1.comp14532_c0_seq1      |
| symbB1.v1.2.024196.t1<br>(B1024196.t1) | 1018        | A                                        | OLP94465.1<br><i>Symbiodinium microadriaticum</i>               | 0       | 45/58                                 | 2271.1     | symbB1.comp8955_c0_seq1       |
| symbB1.v1.2.027502.t1<br>(B1027502.t1) | 1014        | A-PP-C                                   | WP_069865021.1<br><i>Pseudomonas sp. CCA 1</i>                  | 6E-94   | 33/51                                 | 2828.1     | symbB1.comp65743_c0_seq1      |
| symbB1.v1.2.030374.t1<br>(B1030374.t1) | 1687        | PseudoU_synth-A-DUF1796-<br>ATP_grasp    | OLP94465.1<br><i>Symbiodinium microadriaticum</i>               | 7E-134  | 83/91                                 | 3260.1     | symbB1.comp61879_c0_seq1      |
| symbB1.v1.2.031573.t1<br>(B1031573.t1) | 1765        | A-PP-zf_CCHC                             | OLP85280.1<br><i>Symbiodinium microadriaticum</i>               | 0       | 70/80                                 | 3629.1     | symbB1.comp17330_c0_seq1      |
| symbB1.v1.2.033616.t1<br>(B1033616.t1) | 1626        | A-PP-A                                   | OLP85280.1<br><i>Symbiodinium microadriaticum</i>               | 0       | 59/69                                 | 4203.1     | symbB1.comp1062_c0_seq1       |
| symbB1.v1.2.034688.t1<br>(B1034688.t1) | 1028        | A                                        | OLP94465.1<br><i>Symbiodinium microadriaticum</i>               | 0       | 47/61                                 | 4523.1     | symbB1.comp15044_c0_seq1      |
| symbB1.v1.2.034833.t1<br>(B1034833.t1) | 4184        | A-RVT2-PP-C-A-TE                         | ABA73589.1<br><i>Pseudomonas fluorescens Pf0-1</i>              | 9E-128  | 30/47                                 | 4570.1     | symbB1.comp56548_c0_seq1      |
| symbB1.v1.2.036245.t1<br>(B1036245.t1) | 1688        | A-PP-C-A                                 | SF164597.1<br><i>Thermoflavimicrobium<br/>dichotomicum</i>      | 0       | 31/48                                 | 5072.1     | symbB1.comp61452_c0_seq1      |
| symbB1.v1.2.039731.t1<br>(B1039731.t1) | 1496        | A                                        | OLQ01805.1<br><i>Symbiodinium microadriaticum</i>               | 0       | 72/81                                 | 6749.1     | symbB1.comp15708_c0_seq1      |
| s1074_g13.t3<br>(Cs1074_g13.t3)        | 1473        | A-PP-KS                                  | OLP83938.1<br><i>Symbiodinium microadriaticum</i>               | 0       | 77/86                                 | 1074.1     | comp14731_c0_seq1             |
| s115_g25.t1<br>(Cs115_g25.t1)          | 1120        | A-A-PP                                   | OLP85280.1<br><i>Symbiodinium microadriaticum</i>               | 0       | 61/72                                 | 115.1      | comp31049_c0_seq1             |
| s1214_g6.t3<br>(Cs1214_g6.t3)          | 962         | A-PP-Ank-Ank                             | OLQ14049.1<br><i>Symbiodinium microadriaticum</i>               | 0       | 63/72                                 | 1214.1     | comp11808_c0_seq1             |
| s193_g13.t1<br>(Cs193_g13.t1)          | 1763        | A-PP-KS-KR-DH                            | OLQ14315.1<br><i>Symbiodinium microadriaticum</i>               | 0       | 55/69                                 | 193.1      | comp32064_c0_seq1             |
| s2146_g10.t1<br>(Cs2146_g10.t1)        | 1232        | A-PP-DUF1796                             | OLQ07141.1<br><i>Symbiodinium microadriaticum</i>               | 0       | 41/54                                 | 2146.1     | comp16423_c0_seq1             |
| s2227_g13.t2<br>(Cs2227_g13.t2)        | 1644        | A-PP                                     | OLQ07141.1<br><i>Symbiodinium microadriaticum</i>               | 0       | 47/61                                 | 2227.1     | comp3247_c0_seq1              |
| s227_g29.t1<br>(Cs227_g29.t1)          | 1212        | PseudoU_synth-A                          | OLQ07141.1<br><i>Symbiodinium microadriaticum</i>               | 3E-160  | 68/78                                 | 227.1      | comp21373_c0_seq1             |



|                               |      |               |                                                   |        |       |        |                   |
|-------------------------------|------|---------------|---------------------------------------------------|--------|-------|--------|-------------------|
| s2601_g7.t1<br>(Cs2601_g7.t1) | 1090 | A             | WP_011613194.1<br><i>Trichodesmium erythraeum</i> | 9E-128 | 45/60 | 2601.1 | comp6114_c1_seq1  |
| s268_g7.t1<br>(Cs268_g7.t1)   | 1195 | A             | OKH30812.1<br><i>Nostoc calcicola FACHB-389</i>   | 5E-59  | 33/48 | 268.1  | comp16997_c0_seq2 |
| s3964_g1.t1<br>(Cs3964_g1.t1) | 1412 | A             | OLP85140.1<br><i>Symbiodinium microadriaticum</i> | 0      | 66/75 | 3964.1 | comp10752_c0_seq1 |
| s4353_g5.t1<br>(Cs4353_g5.t1) | 1185 | A-PP-C        | WP_081001564.1<br><i>Pseudomonas chlororaphis</i> | 1E-106 | 31/48 | 4353.1 | comp21830_c1_seq1 |
| s830_g19.t1<br>(Cs830_g19.t1) | 1642 | A-MT_31-PP-TE | OLP85140.1<br><i>Symbiodinium microadriaticum</i> | 0      | 71/80 | 830.1  | comp23784_c0_seq1 |

C: Condensation; Ank:Anykyrin repeat; A: AMP-binding ; PP: PP-binding ; KR: Ketoreductase ; DH:dehydratase;TE:Thioesterase; MT-methyltransferase

Supplementary Table S5: Prediction scores of ChloroP and TargetP, supported by DeepLoc subcellular localization predictor

|                            | Gene model      | ChloroP (cTP) | CS-score | cTP-length | TargetP (NN scores) | Location | RC | DeepLoc Location prediction |
|----------------------------|-----------------|---------------|----------|------------|---------------------|----------|----|-----------------------------|
| (a) KS domains from Fig. 1 | As190_g19.t1    |               |          |            | 0.81                | M        | 3  | 0.6096(peroxisome)          |
|                            | As988_g13.t1    |               |          |            | 0.851               | M        | 2  | 0.4082(peroxisome)          |
|                            | As4308_g6.t1    | 0.521         | 6.483    | 49         |                     |          |    | 0.4456(plastid)             |
|                            | A572_g26.t3     | 0.524         | 3.138    | 37         |                     |          |    | 0.6408(plastid)             |
|                            | As1323_g8.t1    |               |          |            | 0.591               | M        | 5  | 0.4421(mitochondrion)       |
|                            | B1003781.t1     |               |          |            | 0.972               | S        | 1  | 0.4811 (peroxisome)         |
|                            | B1028834.t1     |               |          |            | 0.93                | S        | 1  | 0.243(cytoplasm)            |
|                            | B1007906.t1     |               |          |            | 0.698               | S        | 5  | 0.5762(peroxisome)          |
|                            | B1013880.t1     |               |          |            | 0.815               | M        | 2  | 0.6716 (peroxisome)         |
|                            | b1013202.t1     |               |          |            | 0.509               | S        | 4  | 0.2777 (mitochondrion)      |
|                            | Cs894_g33.t1    |               |          |            | 0.832               | S        | 2  | 0.4855 (mitotochondrion)    |
|                            | Cs1029_g13.t1   |               |          |            | 0.994               | S        | 1  | 0.2596 (extracellular)      |
|                            | Cs202_g11.t1.t7 | 0.508         | 4.13     | 72         |                     |          |    | 0.3274 (plastid)            |
| (b) AT domains from Fig. 2 | Cs2692_g2.t11   | 0.519         | 11.239   | 46         |                     |          |    | 0.367 (plastid)             |
|                            | B1015532.t1     |               |          |            | 0.741               | M        | 5  | 0.5208 (cytoplasm)          |
|                            | B1012467.t1     |               |          |            | 0.661               | M        | 3  | 0.6246 (mitochondrion)      |

**cTP** tells whether or not this is predicted as a cTP-containing sequence.

**CS-score** is the MEME scoring matrix score for the suggested cleavage site according to ChloroP.

**cTP-length** is the predicted length of the presequence

**NN scores** on which the final prediction of TargetP is based and the location with the highest score is the most likely.

**RC** is the reliability class, from 1 to 5, where 1 indicates the strongest prediction.

Supplementary Table S6: Features of LTR-retrotransposons identified from PKS-associated scaffolds studied in this paper.

| Clade | Scaffold #      | Location        | Length | Strand | Score <sup>a</sup>       | 5'-LTR <sup>b</sup>      | 3'-LTR <sup>c</sup>               | PBS<br>(Primer Binding Sites) <sup>d</sup> | PPT<br>(Polypurine tract) <sup>e</sup> |
|-------|-----------------|-----------------|--------|--------|--------------------------|--------------------------|-----------------------------------|--------------------------------------------|----------------------------------------|
| B1    | 1171.1          | 95013 - 98077   | 3065   | -      | 6                        | 95013 - 95130 Len: 118   | 97960 - 98077 Len: 118            | [14/17] 97872 - 97888 (-AlaCGC)            | [11/15] 95168 - 95182                  |
|       | 2011.1          | 23 - 6079       | 6057   | -      | 6                        | 23 - 173 Len: 151        | 5929 - 6079 Len: 151              | [14/17] 5908 - 5924 (-GlnCTG)              | [13/15] 174 - 188                      |
|       | 5132.1          | 18094 - 25320   | 7227   | +      | 7                        | 18094 - 19213 Len: 1120  | 24159 - 25320 Len: 1162           | [15/18] 19282 - 19299 (MetCAT)             | [11/15] 24111 - 24125                  |
|       | 55.1            | 181361 - 187363 | 6003   | -      | 7                        | 181361 - 181472 Len: 112 | 187250 - 187363 Len: 114          | [15/21] 187188 - 187208 (-IleTAT)          | [11/15] 181516 - 181530                |
|       | 57.1            | 96596 - 100499  | 3904   | -      | 6                        | 96596 - 97893 Len: 1298  | 99189 - 100499 Len: 1311          | [15/25] 99098 - 99122 (-MetCAT)            | [12/15] 97949 - 97963                  |
|       | 991.1           | 10007 - 16876   | 6870   | -      | 6                        | 10007 - 10738 Len: 732   | 16156 - 16876 Len: 721            | [15/18] 16068 - 16085 (-GlnCTG)            | [11/15] 10816 - 10830                  |
|       |                 | 13136 - 16374   | 3239   | +      | 6                        | 13136 - 13346 Len: 211   | 16179 - 16374 Len: 196            | [14/19] 13417 - 13435 (LeuCAG)             | [12/15] 16164 - 16178                  |
|       |                 | 13392 - 16876   | 3485   | -      | 6                        | 13392 - 13882 Len: 491   | 16391 - 16876 Len: 486            | [16/24] 16359 - 16382 (-SerCGA)            | [11/15] 13960 - 13974                  |
|       |                 | 110819 - 118941 | 8123   | +      | 7                        | 110819 - 110926 Len: 108 | 118834 - 118941 Len: 108          | [14/19] 110973 - 110991 (GlnCTG)           | [12/15] 118750 - 118764                |
|       | 214.1           | 10996 - 23070   | 12075  | +      | 6                        | 10996 - 11125 Len: 130   | 22959 - 23070 Len: 112            | [15/19] 11203 - 11221 (AlaTGC)             | [12/15] 22944 - 22958                  |
|       |                 | 233839 - 242959 | 9121   | -      | 7                        | 233839 - 233994 Len: 156 | 242804 - 242959 Len: 156          | [15/19] 242763 - 242781 (-LeuTAG)          | [11/15] 233995 - 234009                |
|       | 5099.1          | 19008 - 25190   | 6183   | -      | 6                        | 19008 - 19160 Len: 153   | 25024 - 25190 Len: 167            | [15/20] 24990 - 25009 (-SerCGA)            | [13/15] 19235 - 19249                  |
|       | 214.1           | 10996 - 23070   | 12075  | +      | 6                        | 10996 - 11125 Len: 130   | 22959 - 23070 Len: 112            | [15/19] 11203 - 11221 (AlaTGC)             | [12/15] 22944 - 22958                  |
|       |                 | 233839 - 242959 | 9121   | -      | 8                        | 233839 - 233994 Len: 156 | 242804 - 242959 Len: 156          | [15/19] 242763 - 242781 (-LeuTAG)          | [11/15] 233995 - 234009                |
|       | 2052.1          | 52858 - 62137   | 9280   | -      | 6                        | 52858 - 52960 Len: 103   | 62036 - 62137 Len: 102            | [15/20] 61936 - 61955 (-AspGTC)            | [11/15] 52966 - 52980                  |
| 31.1  | 384910 - 392457 | 7548            | -      | 6      | 384910 - 385045 Len: 136 | 392322 - 392457 Len: 136 | [14/21] 392224 - 392244 (-SerAGA) | [12/15] 385118 - 385132                    |                                        |
| A3    | 3551.1          | 22815 - 26576   | 3762   | -      | 6                        | 22815 - 22937 Len: 123   | 26463 - 26576 Len: 114            | ND                                         | [13/15] 22997 - 23011                  |
|       |                 | 25224 - 39923   | 14700  | -      | 6                        | 25224 - 25331 Len: 108   | 39818 - 39923 Len: 106            | ND                                         | [11/15] 25347 - 25361                  |
|       |                 | 25824 - 44954   | 19131  | -      | 6.5                      | 25824 - 26076 Len: 253   | 44706 - 44954 Len: 249            | [14/19] 44659 - 44677 (-SerCGA)            | [11/15] 26080 - 26094                  |
|       |                 | 25826 - 45437   | 19612  | -      | 6                        | 25826 - 26560 Len: 735   | 44708 - 45437 Len: 730            | [14/19] 44659 - 44677 (-SerCGA)            | [12/15] 26578 - 26592                  |
|       |                 | 27416 - 46553   | 19138  | -      | 6                        | 27416 - 28184 Len: 769   | 45798 - 46553 Len: 756            | ND                                         | [14/15] 28202 - 28216                  |
|       |                 | 38907 - 44166   | 5260   | +      | 6                        | 38907 - 39910 Len: 1004  | 43214 - 44166 Len: 953            | [14/18] 39930 - 39947 (LeuTAG)             | [12/15] 43138 - 43152                  |
|       |                 | 39072 - 43376   | 4305   | +      | 6                        | 39072 - 39185 Len: 114   | 43264 - 43376 Len: 113            |                                            | [11/15] 43191 - 43205                  |
|       |                 | 39698 - 49594   | 9897   | +      | 6                        | 39698 - 39910 Len: 213   | 49382 - 49594 Len: 213            | [14/18] 39930 - 39947 (LeuTAG)             | [12/15] 49300 - 49314                  |
|       |                 | 40452 - 44835   | 4384   | -      | 6                        | 40452 - 40576 Len: 125   | 44711 - 44835 Len: 125            | [14/19] 44659 - 44677 (-SerCGA)            | [11/15] 40610 - 40624                  |
|       |                 | 43228 - 45094   | 1867   | -      | 6                        | 43228 - 43559 Len: 332   | 44751 - 45094 Len: 344            | [14/19] 44659 - 44677 (-SerCGA)            | [12/15] 43593 - 43607                  |
|       |                 | 44734 - 50473   | 5740   | +      | 6                        | 44734 - 44938 Len: 205   | 50269 - 50473 Len: 205            | ND                                         | [12/15] 50240 - 50254                  |
|       | 2561.1          | 45561 - 57214   | 11654  | -      | 6                        | 45561 - 46004 Len: 444   | 56768 - 57214 Len: 447            | ND                                         | [11/15] 46067 - 46081                  |
|       | 572.1           | 40146 - 44099   | 3954   | +      | 6                        | 40146 - 40852 Len: 707   | 43402 - 44099 Len: 698            | [14/21] 40904 - 40924 (SerAGA)             | [14/15] 43366 - 43380                  |
|       |                 | 42198 - 46411   | 4214   | +      | 6                        | 42198 - 43173 Len: 976   | 45414 - 46411 Len: 998            | [14/18] 43177 - 43194 (LeuTAG)             | [11/15] 45399 - 45413                  |
|       | 42652 - 46411   | 3760            | +      | 7      | 42652 - 43173 Len: 522   | 45907 - 46411 Len: 505   | [14/18] 43177 - 43194 (LeuTAG)    | [13/15] 45881 - 45895                      |                                        |

|        |                 |       |   |     |                          |                          |                                   |                         |
|--------|-----------------|-------|---|-----|--------------------------|--------------------------|-----------------------------------|-------------------------|
|        | 229591 - 231955 | 2365  | - | 6   | 229591 - 229821 Len: 231 | 231739 - 231955 Len: 217 | [14/19] 231658 - 231676 (-MetCAT) | ND                      |
|        | 229591 - 231955 | 2365  | - | 6   | 229591 - 230049 Len: 459 | 231505 - 231955 Len: 451 | [14/19] 231424 - 231442 (-MetCAT) | ND                      |
|        | 229591 - 231955 | 2365  | - | 6   | 229591 - 229935 Len: 345 | 231625 - 231955 Len: 331 | [14/19] 231538 - 231556 (-MetCAT) | ND                      |
|        | 229591 - 231955 | 2366  | - | 7   | 229591 - 230106 Len: 516 | 231448 - 231955 Len: 508 | [14/20] 231376 - 231395 (-MetCAT) | ND                      |
| 1629.1 | 70450 - 79049   | 8600  | - | 6   | 70450 - 70720 Len: 271   | 78779 - 79049 Len: 271   | ND                                | [13/15] 70768 - 70782   |
|        | 241976 - 251263 | 9288  | + | 6   | 241976 - 242420 Len: 445 | 250808 - 251263 Len: 456 | ND                                | [12/15] 250728 - 250742 |
| 190.1  | 144382 - 146079 | 1698  | + | 6   | 144382 - 144603 Len: 222 | 145857 - 146079 Len: 223 | [14/20] 144647 - 144666 (GlnCTG)  | ND                      |
|        | 213011 - 215482 | 2472  | + | 6   | 213011 - 213143 Len: 133 | 215343 - 215482 Len: 140 | [14/20] 213222 - 213241 (LeuAAG)  | [11/15] 215266 - 215280 |
|        | 213011 - 215482 | 2472  | + | 6   | 213011 - 213143 Len: 133 | 215346 - 215482 Len: 137 | [14/20] 213222 - 213241 (LeuAAG)  | [11/15] 215266 - 215280 |
|        | 213059 - 215446 | 2388  | + | 6   | 213059 - 213166 Len: 108 | 215330 - 215446 Len: 117 | [14/20] 213222 - 213241 (LeuAAG)  | [11/15] 215266 - 215280 |
|        | 213059 - 215446 | 2388  | + | 6   | 213059 - 213166 Len: 108 | 215343 - 215446 Len: 104 | [14/20] 213222 - 213241 (LeuAAG)  | [11/15] 215266 - 215280 |
|        | 213059 - 215452 | 2394  | + | 6   | 213059 - 213166 Len: 108 | 215343 - 215452 Len: 110 | [14/20] 213222 - 213241 (LeuAAG)  | [11/15] 215266 - 215280 |
|        | 276622 - 277917 | 1296  | + | 7   | 276622 - 276762 Len: 141 | 277783 - 277917 Len: 135 | [15/21] 276805 - 276825 (LeuAAG)  | [12/15] 277733 - 277747 |
| 41.1   | 96440 - 112431  | 15992 | + | 6   | 96440 - 96548 Len: 109   | 112325 - 112431 Len: 107 | [14/18] 96623 - 96640 (ProTGG)    | [11/15] 112293 - 112307 |
|        | 276004 - 284536 | 8533  | - | 6.5 | 276004 - 276211 Len: 208 | 284327 - 284536 Len: 210 | [17/26] 284291 - 284316 (-ThrCGT) | [12/15] 276223 - 276237 |
|        | 330216 - 339229 | 9014  | - | 6   | 330216 - 330329 Len: 114 | 339115 - 339229 Len: 115 | [14/19] 339047 - 339065 (-LeuTAG) | [11/15] 330374 - 330388 |
|        | 399839 - 410874 | 11036 | - | 6   | 399839 - 399942 Len: 104 | 410771 - 410874 Len: 104 | [14/16] 410694 - 410709 (-IleAAT) | [11/15] 399955 - 399969 |
| 1206.1 | 56613 - 58066   | 1454  | - | 6   | 56613 - 56721 Len: 109   | 57958 - 58066 Len: 109   | [15/19] 57931 - 57949 (-GlnCTG)   | [12/15] 56768 - 56782   |
|        | 56728 - 58457   | 1730  | - | 6   | 56728 - 56840 Len: 113   | 58345 - 58457 Len: 113   | [14/19] 58278 - 58296 (-LeuTAA)   | [12/15] 56856 - 56870   |
| 4164.1 | 59417 - 61467   | 2051  | + | 6   | 59417 - 59730 Len: 314   | 61142 - 61467 Len: 326   | [14/18] 59775 - 59792 (ThrTGT)    | [12/15] 61075 - 61089   |
|        | 61027 - 62264   | 1238  | + | 6   | 61027 - 61137 Len: 111   | 62154 - 62264 Len: 111   | [14/16] 61164 - 61179 (SerTGA)    | [12/15] 62082 - 62096   |
| 126.1  | 72758 - 79309   | 6552  | + | 7   | 72758 - 72931 Len: 174   | 79134 - 79309 Len: 176   | [16/21] 72971 - 72991 (MetCAT)    | [14/15] 79091 - 79105   |
|        | 124617 - 126040 | 1424  | + | 6   | 124617 - 124803 Len: 187 | 125885 - 126040 Len: 156 | [14/19] 124817 - 124835 (TyrGTA)  | [12/15] 125844 - 125858 |
|        | 124694 - 126040 | 1347  | + | 6   | 124694 - 124803 Len: 110 | 125933 - 126040 Len: 108 | [14/19] 124817 - 124835 (TyrGTA)  | [12/15] 125844 - 125858 |
| 1018.1 | 132419 - 152551 | 20133 | - | 6   | 132419 - 132526 Len: 108 | 152444 - 152551 Len: 108 | [14/22] 152344 - 152365 (-SerCGA) | [11/15] 132536 - 132550 |
|        | 153216 - 158216 | 5001  | - | 6   | 153216 - 153342 Len: 127 | 158106 - 158216 Len: 111 | ND                                | [11/15] 153345 - 153359 |
|        | 156331 - 167768 | 11438 | - | 6   | 156331 - 156457 Len: 127 | 167643 - 167768 Len: 126 | [14/20] 167546 - 167565 (-AlaCGC) | ND                      |
|        | 160683 - 177505 | 16823 | - | 6   | 160683 - 160790 Len: 108 | 177398 - 177505 Len: 108 | [14/17] 177316 - 177332 (-GlnCTG) | [12/15] 160854 - 160868 |
| 665.1  | 7795 - 24932    | 17138 | - | 6   | 7795 - 7898 Len: 104     | 24796 - 24932 Len: 137   | [14/18] 24706 - 24723 (-MetCAT)   | [11/15] 7945 - 7959     |
| 138.1  | 159246 - 164831 | 5586  | + | 6   | 159246 - 159740 Len: 495 | 164337 - 164831 Len: 495 | [14/18] 159802 - 159819 (LeuTAA)  | [12/15] 164242 - 164256 |
| 792.1  | 31964 - 34502   | 2539  | + | 6   | 31964 - 32077 Len: 114   | 34391 - 34502 Len: 112   | [15/20] 32114 - 32133 (LeuTAG)    | ND                      |
|        | 98119 - 110925  | 12807 | - | 6   | 98119 - 98439 Len: 321   | 110597 - 110925 Len: 329 | [14/19] 110569 - 110587 (-GluTTC) | [12/15] 98440 - 98454   |
|        | 98119 - 111134  | 13016 | - | 6   | 98119 - 98665 Len: 547   | 110597 - 111134 Len: 538 | [14/19] 110569 - 110587 (-GluTTC) | [11/15] 98666 - 98680   |
| 527.1  | 225586 - 227135 | 1550  | + | 6   | 225586 - 225718 Len: 133 | 227003 - 227135 Len: 133 | ND                                | [12/15] 226949 - 226963 |
| 508.1  | 80141 - 88969   | 8829  | + | 7   | 80141 - 80378 Len: 238   | 88732 - 88969 Len: 238   | [14/18] 80408 - 80425 (SerAGA)    | [12/15] 88678 - 88692   |
|        | 120408 - 128933 | 8526  | - | 6   | 120408 - 120508 Len: 101 | 128833 - 128933 Len: 101 | [16/20] 128779 - 128798 (-PheGAA) | [11/15] 120509 - 120523 |
|        | 120408 - 129053 | 8646  | + | 6   | 120408 - 120508 Len: 101 | 128953 - 129053 Len: 101 | [14/17] 120544 - 120560 (AspGTC)  | [11/15] 128886 - 128900 |

|   |                 |                 |       |   |                          |                          |                                   |                                   |                         |
|---|-----------------|-----------------|-------|---|--------------------------|--------------------------|-----------------------------------|-----------------------------------|-------------------------|
|   |                 | 128938 - 137665 | 8728  | - | 7                        | 128938 - 129053 Len: 116 | 137545 - 137665 Len: 121          | [16/20] 137511 - 137530 (-PheGAA) | [11/15] 129054 - 129068 |
|   |                 | 129137 - 137810 | 8674  | + | 6                        | 129137 - 129251 Len: 115 | 137696 - 137810 Len: 115          | [14/17] 129276 - 129292 (AspGTC)  | [11/15] 137618 - 137632 |
|   |                 | 183849 - 193303 | 9455  | + | 6                        | 183849 - 184136 Len: 288 | 193020 - 193303 Len: 284          | [14/18] 184195 - 184212 (SerTGA)  | ND                      |
| C | 892.1           | 6622 - 26025    | 19404 | - | 6                        | 6622 - 6881 Len: 260     | 25689 - 26025 Len: 337            | [14/18] 25603 - 25620 (-IleTAT)   | [13/15] 6966 - 6980     |
|   |                 | 7371 - 16651    | 9281  | + | 6                        | 7371 - 8903 Len: 1533    | 15110 - 16651 Len: 1542           | ND                                | [12/15] 15016 - 15030   |
|   |                 | 32386 - 41575   | 9190  | - | 6                        | 32386 - 32552 Len: 167   | 41413 - 41575 Len: 163            | [15/20] 41325 - 41344 (-SerCGA)   | [12/15] 32628 - 32642   |
|   |                 | 76453 - 84886   | 8434  | - | 6                        | 76453 - 76627 Len: 175   | 84689 - 84886 Len: 198            | [14/18] 84650 - 84667 (-GlnCTG)   | ND                      |
|   | 894.1           | 60142 - 63238   | 3097  | - | 6                        | 60142 - 60655 Len: 514   | 62741 - 63238 Len: 498            | ND                                | [13/15] 60685 - 60699   |
|   |                 | 60142 - 63304   | 3163  | - | 6                        | 60142 - 60655 Len: 514   | 62807 - 63304 Len: 498            | ND                                | [13/15] 60685 - 60699   |
|   |                 | 84093 - 107701  | 23609 | - | 6                        | 84093 - 86248 Len: 2156  | 105526 - 107701 Len: 2176         | ND                                | [14/15] 86282 - 86296   |
|   |                 | 86137 - 97800   | 11664 | - | 6                        | 86137 - 86248 Len: 112   | 97689 - 97800 Len: 112            | ND                                | [14/15] 86282 - 86296   |
|   |                 | 103043 - 104868 | 1826  | - | 6                        | 103043 - 103196 Len: 154 | 104716 - 104868 Len: 153          | [14/17] 104649 - 104665 (-GlnTTG) | ND                      |
|   |                 | 254187 - 255899 | 1713  | + | 6                        | 254187 - 254467 Len: 281 | 255618 - 255899 Len: 282          | ND                                | [13/15] 255584 - 255598 |
|   |                 | 254187 - 257103 | 2917  | + | 6                        | 254187 - 254370 Len: 184 | 256919 - 257103 Len: 185          | ND                                | [13/15] 256885 - 256899 |
|   |                 | 254191 - 256389 | 2199  | + | 6                        | 254191 - 254643 Len: 453 | 255910 - 256389 Len: 480          | ND                                | [13/15] 255872 - 255886 |
|   |                 | 254191 - 256389 | 2199  | + | 6                        | 254191 - 254741 Len: 551 | 255816 - 256389 Len: 574          | ND                                | [14/15] 255775 - 255789 |
|   | 574.1           | 197963 - 199919 | 1957  | + | 6                        | 197963 - 198067 Len: 105 | 199815 - 199919 Len: 105          | [14/19] 198130 - 198148 (SerCGA)  | [12/15] 199748 - 199762 |
|   |                 | 229375 - 232257 | 2883  | + | 6.5                      | 229375 - 229583 Len: 209 | 232040 - 232257 Len: 218          | [16/20] 231962 - 231981 (-GlnTTG) | [11/15] 229604 - 229618 |
|   |                 | 237751 - 239203 | 1453  | - | 6                        | 237751 - 237899 Len: 149 | 239055 - 239203 Len: 149          | [14/20] 239003 - 239022 (-GluCTC) | [13/15] 237939 - 237953 |
|   | 144.1*          | 71526 - 79598   | 8073  | - | 6                        | 71526 - 71719 Len: 194   | 79410 - 79598 Len: 189            | [15/21] 79321 - 79341 (-LeuTAG)   | [13/15] 71735 - 71749   |
|   |                 | 209207 - 211111 | 1905  | + | 6                        | 209207 - 209330 Len: 124 | 210989 - 211111 Len: 123          | [15/21] 209408 - 209428 (AlaTGC)  | [11/15] 210959 - 210973 |
|   |                 | 209250 - 211111 | 1862  | + | 6                        | 209250 - 209393 Len: 144 | 210968 - 211111 Len: 144          | [15/21] 209408 - 209428 (AlaTGC)  | [11/15] 210938 - 210952 |
|   |                 | 209250 - 211111 | 1862  | + | 6                        | 209250 - 209372 Len: 123 | 210968 - 211111 Len: 144          | [15/21] 209408 - 209428 (AlaTGC)  | [11/15] 210938 - 210952 |
|   |                 | 464327 - 466467 | 2141  | + | 6                        | 464327 - 464439 Len: 113 | 466355 - 466467 Len: 113          | [16/23] 464483 - 464505 (SerCGA)  | [11/15] 466340 - 466354 |
|   |                 | 464472 - 465948 | 1477  | - | 6                        | 464472 - 464629 Len: 158 | 465789 - 465948 Len: 160          | [14/21] 465707 - 465727 (-SerTGA) | [11/15] 464646 - 464660 |
|   |                 | 527399 - 530149 | 2751  | + | 6                        | 527399 - 527896 Len: 498 | 529669 - 530149 Len: 481          | [15/22] 527975 - 527996 (GlnCTG)  | [13/15] 529580 - 529594 |
|   |                 | 527399 - 530158 | 2760  | + | 6                        | 527399 - 527905 Len: 507 | 529669 - 530158 Len: 490          | [15/22] 527975 - 527996 (GlnCTG)  | [13/15] 529580 - 529594 |
|   | 2246.1          | 113 - 2512      | 2400  | + | 6                        | 113 - 385 Len: 273       | 2219 - 2512 Len: 294              | [14/18] 441 - 458 (TyrGTA)        | [11/15] 2176 - 2190     |
|   |                 | 527 - 2646      | 2120  | - | 6                        | 527 - 635 Len: 109       | 2538 - 2646 Len: 109              | [14/20] 2479 - 2498 (-LeuTAA)     | [11/15] 673 - 687       |
|   | 929.1           | 121850 - 123407 | 1558  | + | 6                        | 121850 - 121967 Len: 118 | 123283 - 123407 Len: 125          | [14/23] 122024 - 122046 (GlnCTG)  | ND                      |
|   |                 | 233694 - 235328 | 1635  | + | 7                        | 233694 - 233845 Len: 152 | 235177 - 235328 Len: 152          | [14/19] 233906 - 233924 (AsnGTT)  | [11/15] 235134 - 235148 |
|   | 121.1           | 91055 - 104339  | 13285 | + | 6                        | 91055 - 91247 Len: 193   | 104147 - 104339 Len: 193          | [16/22] 91319 - 91340 (SerCGA)    | [13/15] 104096 - 104110 |
|   |                 | 115223 - 125158 | 9936  | - | 6                        | 115223 - 115379 Len: 157 | 124998 - 125158 Len: 161          | [14/18] 124898 - 124915 (-SerTGA) | [13/15] 115388 - 115402 |
|   | 116875 - 132473 | 15599           | +     | 7 | 116875 - 117139 Len: 265 | 132206 - 132473 Len: 268 | [15/20] 117219 - 117238 (GlnCTG)  | [12/15] 132144 - 132158           |                         |
|   | 117902 - 126724 | 8823            | -     | 6 | 117902 - 118042 Len: 141 | 126577 - 126724 Len: 148 | [14/20] 126506 - 126525 (-LeuCAG) | [11/15] 118082 - 118096           |                         |
|   | 121024 - 122569 | 1546            | +     | 6 | 121024 - 121272 Len: 249 | 122321 - 122569 Len: 249 | [14/19] 121335 - 121353 (MetCAT)  | ND                                |                         |

|         |                 |       |   |     |                          |                          |                                          |                         |
|---------|-----------------|-------|---|-----|--------------------------|--------------------------|------------------------------------------|-------------------------|
|         | 127000 - 133770 | 6771  | - | 6   | 127000 - 127177 Len: 178 | 133593 - 133770 Len: 178 | [14/18] 133563 - 133580 (-TyrGTA)        | [12/15] 127215 - 127229 |
|         | 198329 - 210153 | 11825 | - | 6   | 198329 - 198436 Len: 108 | 210044 - 210153 Len: 110 | [14/16] 210030 - 210045 (-ValAAC ValTAC) | [11/15] 198468 - 198482 |
|         | 384659 - 403461 | 18803 | - | 6   | 384659 - 384758 Len: 100 | 403361 - 403461 Len: 101 | [14/17] 403287 - 403303 (-GlyTCC)        | [13/15] 384769 - 384783 |
| 1154.1  | 69587 - 87034   | 17448 | - | 6   | 69587 - 69692 Len: 106   | 86923 - 87034 Len: 112   | [14/16] 86855 - 86870 (-GluTTC)          | [12/15] 69733 - 69747   |
|         | 197004 - 211504 | 14501 | + | 7   | 197004 - 197360 Len: 357 | 211156 - 211504 Len: 349 | [16/17] 197410 - 197426 (LeuCAA)         | [12/15] 211080 - 211094 |
| 612.1   | 279163 - 287299 | 8137  | - | 6   | 279163 - 279320 Len: 158 | 287149 - 287299 Len: 151 | [15/21] 287078 - 287098 (-GlnCTG)        | [12/15] 279366 - 279380 |
| 1817.1  | 132492 - 141135 | 8644  | + | 7   | 132492 - 132644 Len: 153 | 140982 - 141135 Len: 154 | [15/21] 132713 - 132733 (LeuTAA)         | [11/15] 140940 - 140954 |
| 895.1   | 139108 - 146591 | 7484  | - | 6   | 139108 - 139287 Len: 180 | 146371 - 146591 Len: 221 | [14/18] 146332 - 146349 (-PheGAA)        | ND                      |
| 1080.1* | 9 - 5995        | 5987  | + | 6   | 9 - 128 Len: 120         | 5879 - 5995 Len: 117     | ND                                       | [11/15] 5803 - 5817     |
|         | 9 - 6856        | 6848  | + | 6   | 9 - 136 Len: 128         | 6725 - 6856 Len: 132     | ND                                       | [11/15] 6651 - 6665     |
|         | 105049 - 106815 | 1767  | - | 6   | 105049 - 105166 Len: 118 | 106698 - 106815 Len: 118 | [14/21] 106638 - 106658 (-SerCGA)        | ND                      |
|         | 105049 - 109600 | 4552  | + | 6   | 105049 - 105166 Len: 118 | 109483 - 109600 Len: 118 | ND                                       | [11/15] 109391 - 109405 |
|         | 105049 - 109887 | 4839  | + | 6   | 105049 - 105166 Len: 118 | 109770 - 109887 Len: 118 | ND                                       | [11/15] 109723 - 109737 |
|         | 106135 - 109652 | 3518  | + | 6   | 106135 - 106327 Len: 193 | 109483 - 109652 Len: 170 | ND                                       | [11/15] 109391 - 109405 |
|         | 106322 - 108000 | 1679  | - | 6   | 106322 - 106429 Len: 108 | 107889 - 108000 Len: 112 | ND                                       | [12/15] 106508 - 106522 |
|         | 106363 - 108300 | 1938  | - | 6   | 106363 - 106523 Len: 161 | 108149 - 108300 Len: 152 | ND                                       | [11/15] 106600 - 106614 |
|         | 106363 - 108455 | 2093  | - | 6   | 106363 - 106639 Len: 277 | 108149 - 108455 Len: 307 | ND                                       | [11/15] 106706 - 106720 |
| 684.1   | 67758 - 75155   | 7398  | + | 6   | 67758 - 68154 Len: 397   | 74767 - 75155 Len: 389   | [16/19] 68219 - 68237 (IleTAT)           | [11/15] 74721 - 74735   |
|         | 69889 - 76205   | 6317  | - | 6   | 69889 - 70124 Len: 236   | 75999 - 76205 Len: 207   | [14/21] 75923 - 75943 (-GluCTC)          | [12/15] 70205 - 70219   |
|         | 69889 - 76435   | 6547  | + | 6   | 69889 - 70350 Len: 462   | 75999 - 76435 Len: 437   | [16/27] 70388 - 70414 (ProTGG)           | [11/15] 75936 - 75950   |
|         | 69889 - 76599   | 6711  | - | 6   | 69889 - 70469 Len: 581   | 75999 - 76599 Len: 601   | [14/21] 75923 - 75943 (-GluCTC)          | [12/15] 70550 - 70564   |
|         | 70134 - 76435   | 6302  | + | 6   | 70134 - 70350 Len: 217   | 76215 - 76435 Len: 221   | [16/27] 70388 - 70414 (ProTGG)           | [11/15] 76140 - 76154   |
|         | 70134 - 76599   | 6466  | - | 6   | 70134 - 70469 Len: 336   | 76215 - 76599 Len: 385   | [14/18] 76121 - 76138 (-GlnCTG)          | [12/15] 70550 - 70564   |
|         | 159518 - 160782 | 1265  | - | 6.5 | 159518 - 159635 Len: 118 | 160666 - 160782 Len: 117 | [15/21] 160643 - 160663 (-LeuAAG)        | [11/15] 159701 - 159715 |
|         | 184999 - 187139 | 2141  | - | 6   | 184999 - 185274 Len: 276 | 186891 - 187139 Len: 249 | [15/20] 186792 - 186811 (-ThrCGT)        | [11/15] 185299 - 185313 |
|         | 185026 - 187021 | 1996  | - | 6   | 185026 - 185466 Len: 441 | 186619 - 187021 Len: 403 | ND                                       | [14/15] 185481 - 185495 |
|         | 241203 - 249130 | 7928  | + | 6   | 241203 - 241415 Len: 213 | 248918 - 249130 Len: 213 | [15/19] 241430 - 241448 (PheGAA)         | [13/15] 248898 - 248912 |
| 228.1   | 275218 - 276629 | 1412  | + | 6   | 275218 - 275420 Len: 203 | 276458 - 276629 Len: 172 | ND                                       | [12/15] 276438 - 276452 |
|         | 275429 - 277241 | 1813  | - | 6   | 275429 - 275615 Len: 187 | 277109 - 277241 Len: 133 | ND                                       | [11/15] 275661 - 275675 |
| 357.1   | 62674 - 72364   | 9691  | + | 6   | 62674 - 63129 Len: 456   | 71911 - 72364 Len: 454   | [14/19] 63207 - 63225 (ThrCGT)           | [14/15] 71896 - 71910   |
|         | 149759 - 161813 | 12055 | + | 7   | 149759 - 149917 Len: 159 | 161655 - 161813 Len: 159 | [15/21] 149921 - 149941 (ValCAC)         | [12/15] 161640 - 161654 |
|         | 180238 - 182969 | 2732  | + | 6   | 180238 - 180551 Len: 314 | 182656 - 182969 Len: 314 | ND                                       | [11/15] 182587 - 182601 |
|         | 210322 - 212492 | 2171  | + | 6   | 210322 - 210504 Len: 183 | 212265 - 212492 Len: 228 | [15/20] 210555 - 210574 (MetCAT)         | [12/15] 212213 - 212227 |
|         | 210596 - 212731 | 2136  | + | 7   | 210596 - 210879 Len: 284 | 212473 - 212731 Len: 259 | [14/20] 210882 - 210901 (SerTGA)         | [12/15] 212383 - 212397 |
|         | 210769 - 212731 | 1963  | + | 7   | 210769 - 210879 Len: 111 | 212620 - 212731 Len: 112 | [14/20] 210882 - 210901 (SerTGA)         | [12/15] 212581 - 212595 |
|         | 210769 - 212908 | 2140  | + | 6   | 210769 - 211104 Len: 336 | 212620 - 212908 Len: 289 | ND                                       | [12/15] 212581 - 212595 |

|        |                 |       |   |     |                          |                          |                                   |                         |
|--------|-----------------|-------|---|-----|--------------------------|--------------------------|-----------------------------------|-------------------------|
| 1344.1 | 111723 - 113537 | 1815  | - | 6   | 111723 - 111982 Len: 260 | 113295 - 113537 Len: 243 | [14/18] 113207 - 113224 (-GlnCTG) | [14/15] 111996 - 112010 |
| 1074.1 | 81236 - 82665   | 1430  | - | 6   | 81236 - 81459 Len: 224   | 82476 - 82665 Len: 190   | [15/20] 82453 - 82472 (-LeuTAA)   | [13/15] 81491 - 81505   |
|        | 159010 - 160425 | 1416  | - | 6.5 | 159010 - 159205 Len: 196 | 160249 - 160425 Len: 177 | [14/17] 160157 - 160173 (-IleAAT) | [11/15] 159221 - 159235 |
|        | 159063 - 160349 | 1287  | - | 7   | 159063 - 159181 Len: 119 | 160249 - 160349 Len: 101 | [14/17] 160157 - 160173 (-IleAAT) | [11/15] 159221 - 159235 |
|        | 214814 - 217867 | 3054  | - | 6   | 214814 - 214921 Len: 108 | 217760 - 217867 Len: 108 | ND                                | [11/15] 214922 - 214936 |
| 193.1  | 143198 - 147027 | 3830  | + | 6   | 143198 - 143975 Len: 778 | 146229 - 147027 Len: 799 | [14/19] 143979 - 143997 (GlnCTG)  | [13/15] 146152 - 146166 |
|        | 143278 - 146193 | 2916  | + | 6   | 143278 - 143505 Len: 228 | 145949 - 146193 Len: 245 | [14/18] 143524 - 143541 (IleTAT)  | [12/15] 145853 - 145867 |
|        | 143676 - 147484 | 3809  | + | 6   | 143676 - 143807 Len: 132 | 147328 - 147484 Len: 157 | [15/19] 143835 - 143853 (MetCAT)  | [12/15] 147312 - 147326 |
|        | 143813 - 147027 | 3215  | + | 6   | 143813 - 143975 Len: 163 | 146866 - 147027 Len: 162 | [14/19] 143979 - 143997 (GlnCTG)  | [11/15] 146778 - 146792 |
|        | 189084 - 191040 | 1957  | - | 7   | 189084 - 189277 Len: 194 | 190843 - 191040 Len: 198 | [16/21] 190754 - 190774 (-IleAAT) | [11/15] 189285 - 189299 |
| 24.1   | 242805 - 244398 | 1594  | + | 6   | 242805 - 243036 Len: 232 | 244152 - 244398 Len: 247 | ND                                | [12/15] 244107 - 244121 |
|        | 287257 - 289315 | 2059  | + | 6   | 287257 - 287531 Len: 275 | 289026 - 289315 Len: 290 | ND                                | [11/15] 288963 - 288977 |
|        | 287298 - 289180 | 1883  | - | 6   | 287298 - 287420 Len: 123 | 289064 - 289180 Len: 117 | ND                                | [12/15] 287447 - 287461 |
|        | 460580 - 468901 | 8322  | + | 6   | 460580 - 460755 Len: 176 | 468725 - 468901 Len: 177 | ND                                | [13/15] 468630 - 468644 |
| 429.1  | 89475 - 95162   | 5688  | - | 6   | 89475 - 89620 Len: 146   | 95018 - 95162 Len: 145   | ND                                | [13/15] 89688 - 89702   |
| 2692.1 | 62963 - 64872   | 1910  | + | 6   | 62963 - 63180 Len: 218   | 64634 - 64872 Len: 239   | ND                                | [12/15] 64594 - 64608   |
| 893.1  | 2955 - 10919    | 7965  | - | 6.5 | 2955 - 3075 Len: 121     | 10800 - 10919 Len: 120   | [14/20] 10725 - 10744 (-SerTGA)   | [12/15] 3089 - 3103     |
|        | 75145 - 83093   | 7949  | + | 6   | 75145 - 75279 Len: 135   | 82960 - 83093 Len: 134   | [15/21] 75290 - 75310 (GlnTTG)    | [13/15] 82877 - 82891   |
|        | 85020 - 86568   | 1549  | + | 6   | 85020 - 85166 Len: 147   | 86423 - 86568 Len: 146   | [14/20] 85192 - 85211 (PheGAA)    | [13/15] 86324 - 86338   |
|        | 85020 - 87877   | 2858  | + | 6   | 85020 - 85204 Len: 185   | 87692 - 87877 Len: 186   | [14/18] 85277 - 85294 (SerCGA)    | [14/15] 87609 - 87623   |
|        | 85132 - 88028   | 2897  | + | 6   | 85132 - 85268 Len: 137   | 87891 - 88028 Len: 138   | [14/18] 85277 - 85294 (SerCGA)    | [11/15] 87848 - 87862   |
|        | 85192 - 89954   | 4763  | - | 6   | 85192 - 85938 Len: 747   | 89254 - 89954 Len: 701   | [15/19] 89156 - 89174 (-AlaTGC)   | [11/15] 85957 - 85971   |
|        | 85323 - 89954   | 4632  | + | 6   | 85323 - 85938 Len: 616   | 89370 - 89954 Len: 585   | [14/19] 85987 - 86005 (ProTGG)    | [11/15] 89355 - 89369   |
|        | 85323 - 89980   | 4658  | + | 6   | 85323 - 85964 Len: 642   | 89370 - 89980 Len: 611   | [14/19] 85987 - 86005 (ProTGG)    | [11/15] 89355 - 89369   |
|        | 85796 - 89980   | 4185  | + | 6   | 85796 - 85964 Len: 169   | 89853 - 89980 Len: 128   | [14/19] 85987 - 86005 (ProTGG)    | [11/15] 89838 - 89852   |
|        | 85903 - 87446   | 1544  | + | 6   | 85903 - 86100 Len: 198   | 87249 - 87446 Len: 198   | [15/22] 86155 - 86176 (GlnCTG)    | [12/15] 87177 - 87191   |
|        | 87951 - 89391   | 1441  | - | 6   | 87951 - 88088 Len: 138   | 89254 - 89391 Len: 138   | [15/19] 89156 - 89174 (-AlaTGC)   | [12/15] 88111 - 88125   |
| 118.1  | 14575 - 16472   | 1898  | - | 6   | 14575 - 14758 Len: 184   | 16286 - 16472 Len: 187   | [14/18] 16262 - 16279 (-ArgTCT)   | [11/15] 14811 - 14825   |
|        | 14575 - 16685   | 2111  | - | 6   | 14575 - 14925 Len: 351   | 16286 - 16685 Len: 400   | [14/18] 16262 - 16279 (-ArgTCT)   | [11/15] 14959 - 14973   |
|        | 18699 - 21393   | 2695  | - | 6   | 18699 - 19035 Len: 337   | 21041 - 21393 Len: 353   | ND                                | [11/15] 19036 - 19050   |
|        | 69834 - 71178   | 1345  | + | 6   | 69834 - 69996 Len: 163   | 71021 - 71178 Len: 158   | ND                                | [11/15] 70972 - 70986   |
|        | 76336 - 77823   | 1488  | + | 7   | 76336 - 76493 Len: 158   | 77668 - 77823 Len: 156   | [14/19] 76575 - 76593 (MetCAT)    | [12/15] 77594 - 77608   |
|        | 76336 - 78568   | 2233  | + | 7   | 76336 - 76493 Len: 158   | 78414 - 78568 Len: 155   | [14/19] 76575 - 76593 (MetCAT)    | [12/15] 78390 - 78404   |
|        | 216947 - 236907 | 19961 | + | 6   | 216947 - 217171 Len: 225 | 236693 - 236907 Len: 215 | [14/19] 217179 - 217197 (IleTAT)  | [12/15] 236660 - 236674 |
|        | 402912 - 404459 | 1548  | + | 6   | 402912 - 403012 Len: 101 | 404359 - 404459 Len: 101 | ND                                | [12/15] 404306 - 404320 |
|        | 533681 - 535037 | 1357  | - | 6   | 533681 - 533828 Len: 148 | 534889 - 535037 Len: 149 | ND                                | [14/15] 533888 - 533902 |

|        |                 |      |   |     |                          |                          |                                   |                         |
|--------|-----------------|------|---|-----|--------------------------|--------------------------|-----------------------------------|-------------------------|
|        | 533681 - 535050 | 1370 | - | 6   | 533681 - 533866 Len: 186 | 534889 - 535050 Len: 162 | ND                                | [14/15] 533888 - 533902 |
| 1269.1 | 63723 - 72250   | 8528 | - | 7   | 63723 - 63869 Len: 147   | 72104 - 72250 Len: 147   | [15/21] 72059 - 72079 (-SerAGA)   | [13/15] 63882 - 63896   |
| 1989.1 | 138962 - 140373 | 1412 | + | 6   | 138962 - 139106 Len: 145 | 140238 - 140373 Len: 136 | [15/19] 139110 - 139128 (SerTGA)  | [12/15] 140204 - 140218 |
| 202.1  | 330201 - 338192 | 7992 | - | 6   | 330201 - 330435 Len: 235 | 337955 - 338192 Len: 238 | [14/20] 337863 - 337882 (-ThrCGT) | [12/15] 330483 - 330497 |
|        | 331030 - 333855 | 2826 | - | 6.5 | 331030 - 331345 Len: 316 | 333535 - 333855 Len: 321 | [15/21] 333490 - 333510 (-GlnCTG) | [12/15] 331413 - 331427 |
|        | 335519 - 337527 | 2009 | + | 6   | 335519 - 335941 Len: 423 | 337092 - 337527 Len: 436 | [14/17] 336008 - 336024 (LeuCAA)  | [13/15] 337077 - 337091 |
|        | 418240 - 420681 | 2442 | - | 6   | 418240 - 418807 Len: 568 | 420102 - 420681 Len: 580 | [14/20] 420009 - 420028 (-GluCTC) | [13/15] 418833 - 418847 |

a: Score is an integer varying from 0 to 11.

b & c: Location of the LTRs. 5'LTR and 3'LTR are two similar regions. A typical LTR retrotransposon has a structure called TG.CA box, with TG at the 5' extremity of 5'LTR and CA at the 3' extremity of 3'LTR.

d: The first number in square brackets is number of matched bases and the second is total alignment length. Following is signal positions. String in parentheses is the tRNA type and anti-codon.

e: The first is the number of purines and length of putative PPT.

ND: Not detected.

\*: Only first 9 outputs are shown out of 24



Supplementary Table S7: Features of LTR-retrotransposons identified with NRPS-associated scaffolds studied in this paper.

| Clade     | Scaffold #    | Location        | Length | Strand | Score <sup>a</sup>     | 5'-LTR <sup>b</sup>      | 3'-LTR <sup>c</sup>            | PBS<br>(Primer Binding Sites) <sup>d</sup> | PPT<br>(Polypurine tract) <sup>e</sup> |
|-----------|---------------|-----------------|--------|--------|------------------------|--------------------------|--------------------------------|--------------------------------------------|----------------------------------------|
| <b>A3</b> | 451.1         | 124432 - 127126 | 2695   | +      | 6                      | 124432 - 124613 Len: 182 | 126946 - 127126 Len: 181       | [15/20] 124630 - 124649 (GlnCTG)           | [13/15] 126920 - 126934                |
|           |               | 124768 - 129338 | 4571   | +      | 6                      | 124768 - 124899 Len: 132 | 129207 - 129338 Len: 132       | [14/20] 124958 - 124977 (AlaTGC)           | [12/15] 129110 - 129124                |
|           | 112.1         | 130245 - 133532 | 3288   | +      | 6                      | 130245 - 130356 Len: 112 | 133421 - 133532 Len: 112       | [14/20] 130365 - 130384 (PheGAA)           | [12/15] 133404 - 133418                |
|           |               | 130357 - 133527 | 3171   | -      | 6                      | 130357 - 130471 Len: 115 | 133408 - 133527 Len: 120       | ND                                         | [11/15] 130549 - 130563                |
|           | 1977.1        | 36433 - 43341   | 6909   | -      | 6.5                    | 36433 - 36594 Len: 162   | 43179 - 43341 Len: 163         | [16/24] 43125 - 43148 (-AsnGTT)            | [14/15] 36633 - 36647                  |
|           |               | 122602 - 124406 | 1805   | +      | 6                      | 122602 - 122819 Len: 218 | 124212 - 124406 Len: 195       | [14/19] 122867 - 122885 (LeuTAG)           | [13/15] 124117 - 124131                |
|           | 2138.1        | 6877 - 22893    | 16017  | +      | 6                      | 6877 - 6982 Len: 106     | 22788 - 22893 Len: 106         | [15/19] 7025 - 7043 (LeuTAG)               | [12/15] 22698 - 22712                  |
|           |               | 22900 - 27800   | 4901   | +      | 6.5                    | 22900 - 23005 Len: 106   | 27699 - 27800 Len: 102         | [14/17] 23040 - 23056 (IleTAT)             | [11/15] 27659 - 27673                  |
|           | 745.1         | 22201 - 23780   | 1580   | -      | 6                      | 22201 - 22314 Len: 114   | 23668 - 23780 Len: 113         | [15/22] 23584 - 23605 (-IleAAT)            | [11/15] 22396 - 22410                  |
| <b>B1</b> | 3629.1        | 16587 - 24405   | 7819   | -      | 7                      | 16587 - 16755 Len: 169   | 24237 - 24405 Len: 169         | ND                                         | [12/15] 16756 - 16770                  |
|           | 4570.1        | 19443 - 27781   | 8339   | -      | 7                      | 19443 - 19722 Len: 280   | 27502 - 27781 Len: 280         | ND                                         | [12/15] 19768 - 19782                  |
| <b>C</b>  | 535.1         | 288896 - 297474 | 8579   | +      | 6.5                    | 288896 - 288996 Len: 101 | 297372 - 297474 Len: 103       | [14/19] 289012 - 289030 (MetCAT)           | [12/15] 297357 - 297371                |
|           | 1214.1        | 142212 - 157440 | 15229  | -      | 6                      | 142212 - 142355 Len: 144 | 157290 - 157440 Len: 151       | [15/22] 157211 - 157232 (-AlaCGC)          | [13/15] 142356 - 142370                |
|           | 193.1         | 143198 - 147027 | 3830   | +      | 6                      | 143198 - 143975 Len: 778 | 146229 - 147027 Len: 799       | [14/19] 143979 - 143997 (GlnCTG)           | [13/15] 146152 - 146166                |
|           |               | 143278 - 146193 | 2916   | +      | 6                      | 143278 - 143505 Len: 228 | 145949 - 146193 Len: 245       | [14/18] 143524 - 143541 (IleTAT)           | [12/15] 145853 - 145867                |
|           |               | 143676 - 147484 | 3809   | +      | 6                      | 143676 - 143807 Len: 132 | 147328 - 147484 Len: 157       | [15/19] 143835 - 143853 (MetCAT)           | [12/15] 147312 - 147326                |
|           |               | 143813 - 147027 | 3215   | +      | 6                      | 143813 - 143975 Len: 163 | 146866 - 147027 Len: 162       | [14/19] 143979 - 143997 (GlnCTG)           | [11/15] 146778 - 146792                |
|           |               | 189084 - 191040 | 1957   | -      | 7                      | 189084 - 189277 Len: 194 | 190843 - 191040 Len: 198       | [16/21] 190754 - 190774 (-IleAAT)          | [11/15] 189285 - 189299                |
|           | 2146.1        | 31479 - 36824   | 5346   | -      | 7                      | 31479 - 31731 Len: 253   | 36571 - 36824 Len: 254         | [14/19] 36547 - 36565 (-ProTGG)            | [12/15] 31761 - 31775                  |
|           |               | 32468 - 37643   | 5176   | -      | 6                      | 32468 - 32971 Len: 504   | 37158 - 37643 Len: 486         | [14/22] 37077 - 37098 (-AlaAGC)            | [12/15] 33010 - 33024                  |
|           |               | 35948 - 40886   | 4939   | -      | 6                      | 35948 - 36131 Len: 184   | 40707 - 40886 Len: 180         | [14/20] 40631 - 40650 (-LeuTAA)            | ND                                     |
|           |               | 36018 - 41388   | 5371   | +      | 7                      | 36018 - 36539 Len: 522   | 40877 - 41388 Len: 512         | [15/21] 36608 - 36628 (SerTGA)             | [13/15] 40794 - 40808                  |
|           | 227.1*        | 5759 - 37699    | 1941   | +      | 6                      | 35759 - 36172 Len: 414   | 37285 - 37699 Len: 415         | [15/19] 36253 - 36271 (LeuCAA)             | [11/15] 37226 - 37240                  |
|           |               | 85652 - 91173   | 5522   | -      | 6                      | 85652 - 86139 Len: 488   | 90728 - 91173 Len: 446         | [14/19] 90701 - 90719 (-AlaTGC)            | [11/15] 86156 - 86170                  |
|           |               | 85652 - 91219   | 5568   | -      | 6                      | 85652 - 86139 Len: 488   | 90728 - 91219 Len: 492         | [14/19] 90701 - 90719 (-AlaTGC)            | [11/15] 86156 - 86170                  |
|           |               | 85652 - 91265   | 5614   | -      | 6                      | 85652 - 86093 Len: 442   | 90772 - 91265 Len: 494         | [14/19] 90701 - 90719 (-AlaTGC)            | [11/15] 86156 - 86170                  |
|           | 85652 - 91276 | 5625            | +      | 6      | 85652 - 86075 Len: 424 | 90864 - 91276 Len: 413   | [14/19] 86093 - 86111 (SerCGA) | [11/15] 90781 - 90795                      |                                        |

|       |                 |      |   |   |                          |                          |                                  |                         |
|-------|-----------------|------|---|---|--------------------------|--------------------------|----------------------------------|-------------------------|
|       | 85652 - 91401   | 5750 | + | 6 | 85652 - 85970 Len: 319   | 91102 - 91401 Len: 300   | ND                               | [11/15] 91019 - 91033   |
|       | 85699 - 91081   | 5383 | - | 6 | 85699 - 86139 Len: 441   | 90682 - 91081 Len: 400   | [15/23] 90651 - 90673 (-IleAAT)  | [11/15] 86156 - 86170   |
|       | 85745 - 91127   | 5383 | - | 6 | 85745 - 86139 Len: 395   | 90682 - 91127 Len: 446   | [15/23] 90651 - 90673 (-IleAAT)  | [11/15] 86156 - 86170   |
|       | 85791 - 91035   | 5245 | - | 6 | 85791 - 86139 Len: 349   | 90682 - 91035 Len: 354   | [15/23] 90651 - 90673 (-IleAAT)  | [11/15] 86156 - 86170   |
| 268.1 | 334018 - 342657 | 8640 | + | 8 | 334018 - 334147 Len: 130 | 342526 - 342657 Len: 132 | [16/23] 334160 - 334182 (GlnCTG) | [11/15] 342478 - 342492 |
| 830.1 | 42518 - 44223   | 1706 | - | 6 | 42518 - 42693 Len: 176   | 44044 - 44223 Len: 180   | [14/18] 43968 - 43985 (-IleAAT)  | [11/15] 42695 - 42709   |
|       | 120620 - 122987 | 2368 | + | 6 | 120620 - 120849 Len: 230 | 122781 - 122987 Len: 207 | [14/19] 120862 - 120880 (IleAAT) | [11/15] 122722 - 122736 |
|       | 120652 - 123784 | 3133 | + | 6 | 120652 - 120868 Len: 217 | 123569 - 123784 Len: 216 | [14/18] 120938 - 120955 (LeuTAG) | [11/15] 123527 - 123541 |
|       | 120899 - 123577 | 2679 | + | 7 | 120899 - 121301 Len: 403 | 123213 - 123577 Len: 365 | [14/18] 121338 - 121355 (LeuTAG) | [11/15] 123176 - 123190 |
|       | 120899 - 123577 | 2679 | + | 7 | 120899 - 121166 Len: 268 | 123349 - 123577 Len: 229 | [14/18] 121210 - 121227 (LeuTAG) | [11/15] 123255 - 123269 |
|       | 120899 - 123577 | 2679 | + | 7 | 120899 - 121429 Len: 531 | 123077 - 123577 Len: 501 | [14/18] 121471 - 121488 (LeuTAG) | [11/15] 123040 - 123054 |
|       | 121125 - 123024 | 1900 | + | 6 | 121125 - 121515 Len: 391 | 122653 - 123024 Len: 372 | ND                               | [11/15] 122585 - 122599 |

a: Score is an integer varying from 0 to 11.

b & c: Location of the LTRs. 5'LTR and 3'LTR are two similar regions. A typical LTR retrotransposon has a structure called TG.CA box, with TG at the 5' extremity of 5'LTR and CA at the 3' extremity of 3'LTR.

d: The first number in square brackets is number of matched bases and the second is total alignment length. Following is signal positions. String in parentheses is the tRNA type and anti-codon.

e: The first is the number of purines and length of putative PPT.

ND: Not detected.

\*: Only first 9 outputs are shown out of 24

Supplementary Table S8: Details of NCBI, MMETSP and *Symbiodinium kawagutii* sequences belonging to the Dinoflagellate PKS clade (Green insert) in Fig. 1

| <b>NCBI</b>                       |                                  |
|-----------------------------------|----------------------------------|
| <b>Sequence name</b>              | <b>Accession Number/ gene ID</b> |
| <i>A.spinosum</i> AS3D902         | AIW63286.1                       |
| <i>K.brevis</i> KB5361            | ABQ85800.1                       |
| <i>G.polynesiensis</i> AHM27264.1 | AHM27264.1                       |
| <i>A.spinosum</i> AS3D903         | AIW63287.1                       |
| <i>A.ostenfeldii</i> AFW98413.1   | AFW98413.1                       |
| <i>K.brevis</i> KB2006            | ABQ85797.1                       |
| <i>A.ostenfeldii</i> AFW98412.1   | AFW98412.1                       |
| <i>A.spinosum</i> AS3D904         | AIW63288.1                       |
| <i>H.triquetra</i> AFW98415.1     | AFW98415.1                       |
| <i>S.kawagutii</i> 222406         | Skav222406                       |
| <i>K.brevis</i> KB4825            | ABQ85798.1                       |
| <i>K.brevis</i> KB1008            | ABQ85796.1                       |

| <b>MMETSP</b>                          |                                                                              |
|----------------------------------------|------------------------------------------------------------------------------|
| <b>Sequence name</b>                   | <b>Sequence ID</b>                                                           |
| <i>Symbiodinium</i> A KS0042291333     | CAMPEP_0196899616 /NCGR_PEP_ID=MMETSP1374-20130617 79528_1                   |
| <i>Symbiodinium</i> A KS0042212549     | CAMPEP_0196831228 /NCGR_PEP_ID=MMETSP1374-20130617 1885_1                    |
| <i>Symbiodinium</i> D1a KS 0042383695  | CAMPEP_0196972188 /NCGR_PEP_ID=MMETSP1377-20130617 114813_1                  |
| <i>Symbiodinium</i> A KS0042213687     | CAMPEP_0196832172 /NCGR_PEP_ID=MMETSP1374-20130617 2503_1                    |
| <i>Symbiodinium</i> D1a KS0042406815   | CAMPEP_0196991650 /NCGR_PEP_ID=MMETSP1377-20130617 138647_1                  |
| <i>Symbiodinium</i> A KS0042228871     | CAMPEP_0196845784 /NCGR_PEP_ID=MMETSP1374-20130617 10937_1                   |
| <i>Symbiodinium</i> D1a 0042350567     | CAMPEP_0196945412 /NCGR_PEP_ID=MMETSP1377-20130617 71860_1                   |
| <i>Symbiodinium</i> C1 KS0045394493    | CAMPEP_0199555398 /NCGR_PEP_ID=Symbiodinium-sp-C1-20140214 916_1             |
| <i>Symbiodinium</i> C1 KS0045406663    | CAMPEP_0199566116 /NCGR_PEP_ID=Symbiodinium-sp-C1-20140214 7881_1            |
| <i>Symbiodinium</i> sp-Mp KS0036770103 | CAMPEP_0192565212 /NCGR_PEP_ID=Symbiodinium-sp-Mp-20130822 31_1              |
| <i>Symbiodinium</i> C1a KS0045417207   | CAMPEP_0199575736 /NCGR_PEP_ID=Symbiodinium-sp-C1-20140214 13569_1           |
| <i>Symbiodinium</i> sp-Mp KS0036784927 | CAMPEP_0192578502 /NCGR_PEP_ID=Symbiodinium-sp-Mp-20130822 8950_1            |
| <i>Symbiodinium</i> C1 KS0045402761    | CAMPEP_0199562872 /NCGR_PEP_ID=Symbiodinium-sp-C1-20140214 5679_1            |
| <i>Symbiodinium</i> C1a KS0045408335   | CAMPEP_0199567626 /NCGR_PEP_ID=Symbiodinium-sp-C1-20140214 8745_1            |
| <i>Symbiodinium</i> D1a KS0042408223   | CAMPEP_0196993016 /NCGR_PEP_ID=MMETSP1377-20130617 139351_1                  |
| <i>Symbiodinium</i> sp-Mp KS0036814021 | CAMPEP_0192602342 /NCGR_PEP_ID=Symbiodinium-sp-Mp-20130822 27721_1           |
| <i>Symbiodinium</i> A KS0042218263     | CAMPEP_0196836150 /NCGR_PEP_ID=MMETSP1374-20130617 4963_1                    |
| <i>Symbiodinium</i> D1a KS0042389817   | CAMPEP_0196977200 /NCGR_PEP_ID=MMETSP1377-20130617 122114_1                  |
| <i>Symbiodinium</i> C1 KS0045399549    | CAMPEP_0199560036 /NCGR_PEP_ID=Symbiodinium-sp-C1-20140214 3696_1            |
| <i>A.carterae</i> KS0029207815         | CAMPEP_0186409720 /NCGR_PEP_ID=Amphidinium-carterae-CCMP1314-20130924 551_1  |
| <i>A.carterae</i> KS0029210987         | CAMPEP_0186412490 /NCGR_PEP_ID=Amphidinium-carterae-CCMP1314-20130924 2444_1 |
| <i>A.carterae</i> KS0029207525         | CAMPEP_0186409468 /NCGR_PEP_ID=Amphidinium-carterae-CCMP1314-20130924 381_1  |

|                                   |                                                                               |
|-----------------------------------|-------------------------------------------------------------------------------|
| <i>A.carterae</i> KS0029266881    | CAMPEP 0186460252 /NCGR PEP ID=Amphidinium-carterae-CCMP1314-20130924 62901 1 |
| <i>A.carterae</i> KS0029214519    | CAMPEP 0186415646 /NCGR PEP ID=Amphidinium-carterae-CCMP1314-20130924 4682 1  |
| <i>P.reticulatum</i> KS0008371577 | CAMPEP 0168358974 /NCGR PEP ID=MMETSP0228-20121227 1397 1                     |
| <i>P.reticulatum</i> KS0008381755 | CAMPEP 0168368902 /NCGR PEP ID=MMETSP0228-20121227 6486 1                     |
| <i>P.beii</i> KS0043195877        | CAMPEP 0197625458 /NCGR PEP ID=MMETSP1338-20131121 4820 1                     |
| <i>P.beii</i> KS0043213389        | CAMPEP 0197640526 /NCGR PEP ID=MMETSP1338-20131121 14787 1                    |
| <i>P.beii</i> KS0043208619        | CAMPEP 0197636402 /NCGR PEP ID=MMETSP1338-20131121 11914 1                    |
| <i>G.catenatum</i> KS0005298767   | CAMPEP 0117503450 /NCGR PEP ID=MMETSP0784-20121206 24336 1                    |
| <i>G.catenatum</i> KS0005265677   | CAMPEP 0117471558 /NCGR PEP ID=MMETSP0784-20121206 7791 1                     |
| <i>P.bahamense</i> KS0020712219   | CAMPEP 0179016528 /NCGR PEP ID=MMETSP0796-20121207 3365 1                     |
| <i>P.bahamense</i> KS0020707261   | CAMPEP 0179011850 /NCGR PEP ID=MMETSP0796-20121207 886 1                      |
